# Supplementary material
Source: MDPI journal article supplement (https://www.mdpi.com/2071-1050/15/7/6174)
Supplement: s1 [file s1]

## A. Food groups description

| Group     | Food items included (in Portuguese)                                                                                                                                                                                                                                                                                                                                                                                                                                                                                                                                                                                                                                                                                                                                                                                                                                                                                                                                                                                                                                                                                                                                                                                                                                                                                                                                                                                                                                                                                                                                                                                                                                                                                                                                                                                                                                                                                                                                                                                                                                                                                                                                                                                                                                                                                                                                |
|-----------|--------------------------------------------------------------------------------------------------------------------------------------------------------------------------------------------------------------------------------------------------------------------------------------------------------------------------------------------------------------------------------------------------------------------------------------------------------------------------------------------------------------------------------------------------------------------------------------------------------------------------------------------------------------------------------------------------------------------------------------------------------------------------------------------------------------------------------------------------------------------------------------------------------------------------------------------------------------------------------------------------------------------------------------------------------------------------------------------------------------------------------------------------------------------------------------------------------------------------------------------------------------------------------------------------------------------------------------------------------------------------------------------------------------------------------------------------------------------------------------------------------------------------------------------------------------------------------------------------------------------------------------------------------------------------------------------------------------------------------------------------------------------------------------------------------------------------------------------------------------------------------------------------------------------------------------------------------------------------------------------------------------------------------------------------------------------------------------------------------------------------------------------------------------------------------------------------------------------------------------------------------------------------------------------------------------------------------------------------------------------|
| Beverages | <p> <i>Refresco tang; Bebida alcoólica; Cachaca; Caipirinha; Batida de qualquer sabor; Cerveja; Vinho; Suco; Suco natural de fruta; Suco de laranja; Suco de maracuja; Suco de goiaba; Suco de manga; Suco de uva; Suco de abacaxi; Limonada; Suco de acerola; Suco de morango; Suco natural, mistura de frutas; Suco de pessego; Suco verde; Suco de cupuacu; Suco natural de vegetais; Suco natural, mistura de frutas e vegetais; Suco de tamarindo; Suco detox; Suco de caja/ mangaba/ tapereba e outros regionais; Refresco de caju; Refresco de limao; Refresco de laranja; Refresco; Q-suco; Refresco de maracuja; Refrigerante de cola tradicional; Coca cola tradicional; Refrigerante de guarana tradicional; Refrigerante não especificado; Refrigerante de laranja tradicional; Refrigerante de uva tradicional; Guarana tradicional; Sprite refrigerante tradicional; Refrigerante de limao tradicional; Fanta laranja tradicional; Bebida refrigerante, tipo h2o; Refresco de guarana natural; Ice tea tradicional; Refrigerante de cola light; Toddynho; Leite achocolatado; Leite aromatizado; Bebida achocolatada; Leite de soja com sabor; Leite de soja em po; Cafe; Cafe com leite; Cafe tipo capuccino; Cafe tipo expresso; Cha mate; Chimarrao; Cha diet (preto, camomila, erva cidreira, capim limao, etc); Cha (preto, camomila, erva cidreira, capim limao, etc); Cha verde, cha branco, cha vermelho; Cha, ervas não especificado; Caldo de cana; Energetico; Bebida energetica; Bebida isotonica; Agua de coco; Cevada em po;</i> </p>                                                                                                                                                                                                                                                                                                                                                                                                                                                                                                                                                                                                                                                                                                                                                                                                  |
| Meat      | <p> <i>File mignon; Contrafile; Bisteca bovina; Alcatra; Picanha; Tatu (lagarto redondo); Musculo bovino; Chambaril; Carne marica bovina; Costela bovina; Rabada bovina; Mocoto bovino; Carne moida; Bife; Carne bovina; Bife a milanese; Bife de panela; Carne de panela; Hamburger de carne bovina; Costela; Churrasco; Churrasquinho; Bife a parmegiana; Almondega; Strogonoff / estrogonofe; Pacoca de carne de sol; Costela com aipim / macaxeira / mandioca; Carne com batata, inhame, batata baroa ou aipim; Carne com legumes (exceto batata, inhame e aipim); Carne de boi com legumes; Carne cozida com legumes e batata; Ensopado de carne com legumes e batata; Carne assada recheada; Carne desfiada; Lagarto recheado com cenoura; Lagarto recheado com linguica; Picadinho de carne; Quibe assado / quibe de forno; Strogonoff / estrogonofe de carne; Bisteca suina / bisteca de porco; Costela suina / costela de porco; Carne suina / carne de porco; Carne de porco; Pernil (de porco / suino); Carne de porco com legumes; Parte de galinha ou frango não especificada; Frango em pedacos; Galinha em pedacos; Carne de galinha; Frango desfiado; Peito de galinha ou frango; File de frango; Sobrecoxa / coxa de frango / galinha; Asa de galinha ou frango; Drumete de galinha ou frango; Peito de peru; Chester; Frango a passarinho; Hamburger de frango; Bife de frango ou galinha a parmegiana; Steak de frango; Galinha com arroz; Galinhada; Galinhada caipira; Frango com batata / inhame / batata baroa / aipim; Frango com legumes (exceto batata, inhame e aipim); Frango caipira; Frango ensopado; Frango ou galinha com pequi; Frango ou galinha ao molho pardo / galinha de cabidela; Fricasse de frango ou galinha; Strogonoff / estrogonofe de frango ou galinha; File de peixe; Peixe do mar (em posta, em file, etc); Ceviche de peixe; Sashimi; Peixe de agua doce (em posta, em file, etc); Peixe não especificado (em posta, em file, etc); Sardinha em conserva; Atum em conserva; Salmao em conserva; Peixe salgado (em posta, em file, etc); Bacalhau; Peixe de agua doce salgado (em posta, em file, etc); Bobo de camarao; Caldo de pinto; Camarao com molho branco; Peixe assado com legumes e batatas; Peixe ensopado com batatas; Peixe ao leite de coco; Carne de sol; Carne salgada não especificada;</i> </p> |

| Group           | Food items included (in Portuguese)                                                                                                                                                                                                                                                                                                                                                                                                                                                                                                                                                                                                                                                                                                                                                                                                                                                                                                                                                                                                                                                                                                                                                                                                                                                                                                                                                                                    |
|-----------------|------------------------------------------------------------------------------------------------------------------------------------------------------------------------------------------------------------------------------------------------------------------------------------------------------------------------------------------------------------------------------------------------------------------------------------------------------------------------------------------------------------------------------------------------------------------------------------------------------------------------------------------------------------------------------------------------------------------------------------------------------------------------------------------------------------------------------------------------------------------------------------------------------------------------------------------------------------------------------------------------------------------------------------------------------------------------------------------------------------------------------------------------------------------------------------------------------------------------------------------------------------------------------------------------------------------------------------------------------------------------------------------------------------------------|
|                 | <i>Linguica (suina, bovina, mista, etc); Linguica calabresa; Linguica de frango; Salsicha; Mortadela; Presunto; Salame; Salaminho; Pate (figado, calabres, frango, presunto, etc); Figado bovino; Figado bovino (bife); Lingua bovina; Lingua suina / lingua de porco; Bucho / dobradinha ensopado(a); Coracao de frango; Figado de galinha ou frango; ,</i>                                                                                                                                                                                                                                                                                                                                                                                                                                                                                                                                                                                                                                                                                                                                                                                                                                                                                                                                                                                                                                                           |
| Cereals         | <i>Arroz (polido, parboilizado, agulha, agulhinha, etc); Arroz branco; Arroz integral; Arroz 7 grãos; Risoto; Sushi; Charuto de repolho com frango ; Arroz à grega ; Arroz carreteiro/arroz tropeiro ; Maria isabel; Arroz de leite; Arroz chop suey; Arroz com frango e pequi; Arroz com legumes; Arroz com lentilha; Arroz com macarrão / aletria / alitria / cabelo de anjo; Arroz com salsicha / linguiça; Arroz com frango / arroz com capote; Bolinho de arroz; Temaki; Cuscuz; Pamonha; Milho verde em conserva; Angu de milho; Polenta; Pipoca doce ou salgada; Milho cozido; Cuscuz marroquino; ,</i>                                                                                                                                                                                                                                                                                                                                                                                                                                                                                                                                                                                                                                                                                                                                                                                                         |
| Sweets          | <i>Barra de chocolate; Brigadeiro; Chocolate; Bombom de qualquer marca; Ovo de pascoa; Tablete de chocolate; Chocolate, tablete não especificado; Confete; Chocolate, tablete, ao leite; Chocolate, tablete, branco; Chocolate, tablete, meio amargo; Chocolate, tablete, ao leite, recheado; Achocolatado em po; Canjica; Pudim de leite; Cuscuz com leite; Mousse; Doce de leite; Milk shake; Pudim de qualquer sabor; Curau de milho; Chande de qualquer sabor; Arroz-doce; Leite condensado; Pasta de amendoim; Doce de amendoim; Pacoca; Pacoquinha de amendoim; Goiabada; Doce de frutas em pasta de qualquer sabor; Banana flambada; Doce de frutas em calda de qualquer sabor; Geleia de frutas de qualquer marca ou sabor; Sorvete de qualquer sabor industrializado; Din din; Sorvete de casquinha / cone; Picole de qualquer sabor industrializado; Sorvete à base de iogurte; Rapadura; Sorvete sundae; Melado; Açúcar; Mel; Adocante artificial; Gelatina de qualquer sabor; Bala; Tapioca doce recheada; Gemada; Pizza doce de qualquer sabor; Jujuba; Pave de qualquer sabor; Doce de abobora; Barra de cereais; Pirulito; Crepe / panqueca de fruta com Açúcar e canela; Cocada; Geleia de mocoto; Bala de goma; Marshmallow; Crepe / panqueca de geleia; Churro; Barra de cereais doce; Pastel com recheio doce; Bala de fruta; Chicletes; Doce de frutas em barra ou pasta light; Geleia diet; ,</i> |
| Flour and pasta | <i>Lasanha; Beiju; Farinha de tapioca ; Tapioca de goma ; Tapioca; Farofa; Farofa com carne / linguica/ bacon; Farofa com ovos; Farofa de couve; Farofa pronta; Farofa de banana; Farinha de aveia; Aveia em flocos; Sucrilhos de milho; Cereal matinal de milho em flocos; Farinha lactea; Granola; Panqueca; Lasanha / lasanha de beringela; Crepe; Lazanha; Lasanha / lasanha de frango ou galinha; Miojo; Macarrão instantâneo; Macarrão; Macarronada; Macarrão com carne ; Macarrão com peixe ; Macarrão com salsicha ; Macarrão cremoso/sugo/tomate; Macarrão com frango ou galinha ; Massa/macarrão integral; Macarrão com queijo; Macarrão com legumes ; Macarrão com molho branco; Macarrão com camarão; Yakissoba; Yakissoba de carne; Macarão ao alho e óleo; Macarrão com linguiça; Salada de macarrão; ,</i>                                                                                                                                                                                                                                                                                                                                                                                                                                                                                                                                                                                              |
| Fruits          | <i>Abacaxi; Açaí; Açaí com guaraná e granola; Banana da terra; Banana (ouro, prata, d'água, etc); Laranja (pêra, seleta, lima, da terra, etc); Maçã; Mamão; Papaia ; Manga; Melancia; Tangerina; Mexerica; Uva; Uva passa; Damasco; Fruta seca ou desidratada; Limão (comum, galego, etc); Abacate; Caqui; Melão; Pêra; Pêssego; Pinha (fruta de conde); Goiaba; Ameixa; Cereja; Cajá</i>                                                                                                                                                                                                                                                                                                                                                                                                                                                                                                                                                                                                                                                                                                                                                                                                                                                                                                                                                                                                                              |

| Group             | Food items included (in Portuguese)                                                                                                                                                                                                                                                                                                                                                                                                                                                                                                                                                                                                                                                                                                                                                                                                                                                                                                                                                                        |
|-------------------|------------------------------------------------------------------------------------------------------------------------------------------------------------------------------------------------------------------------------------------------------------------------------------------------------------------------------------------------------------------------------------------------------------------------------------------------------------------------------------------------------------------------------------------------------------------------------------------------------------------------------------------------------------------------------------------------------------------------------------------------------------------------------------------------------------------------------------------------------------------------------------------------------------------------------------------------------------------------------------------------------------|
|                   | <i>manga; Jabuticaba /jaboticaba; Morango; Sapoti; Pequi; Pitanga; Acerola; Kiwi; Abricó; Lichia; Salada de frutas; ,</i>                                                                                                                                                                                                                                                                                                                                                                                                                                                                                                                                                                                                                                                                                                                                                                                                                                                                                  |
| Dairy Products    | <i>Leite de vaca integral; Leite de vaca fresco; Leite em po integral; Leite em po; Leite não especificado pasteurizado; Leite de vaca desnatado; Leite de vaca semidesnatado; Mucilon; Mingau de arroz; Mingau de milho; Mingau de maizena; Mingau (fuba, aveia, farinha, etc); Vitamina; Vitamina de banana; Vitamina de banana com aveia; Vitamina de mamão; Vitamina de abacate; Vitamina de morango; Vitamina mista; Vitamina de fruta com leite e cereal; Queijo prato; Queijo colonial; Queijo muçarela; Mussarela / mucarela; Queijo de minas; Queijo de coalho; Queijo canastra; Queijo ricota; Queijo ralado; Requeijão; Queijo cremoso; Queijo não especificado; Iogurte de qualquer sabor; Iogurte desnatado; Iogurte natural; Coalhada; Creme de leite; Yakult de qualquer sabor; Bebida láctea; Leite fermentado; Leite sem lactose; Kefir; Iogurte de qualquer sabor light; Queijo mussarela / mucarela light; Queijo de minas light; Requeijão light; Queijo não especificado light; ,</i> |
| Legumes           | <i>Purê de abóbora / jerimum / gerimum; Abóbora; Cenoura; Chuchu; Pepino; Picles; Tomate; Cogumelo em conserva; Abobrinha; Jiló; Maxixe; Palmito in natura; Pimentão; Pimenta malagueta; Quiabo; Vagem; Berinjela / beringela; Alho; Vegetais não especificados; Nabo em conserva; Salada de legumes; Salada de legumes e verduras; Batata, cenoura e chuchu; Jardineira de legumes; Legumes gratinados; Refogadinho de legumes; Salada de legumes, verduras e frutas; Cogumelo in natura; ,</i>                                                                                                                                                                                                                                                                                                                                                                                                                                                                                                           |
| Vegetables        | <i>Feijão (preto, mulatinho, roxo, rosinha, etc); Feijão de corda; Feijão verde; Feijoada; Baião de dois; Feijão tropeiro; Tutu; Arroz com feijão; Dobradinha com feijão branco; Feijão com bacon; Feijão com linguiça; Proteína de soja; Tofu; Stroganoff / estrogonofe de carne de soja; Ervilha em grão; Andu; Grão de bico; Lentilha; Ervilha em vagem; Petit pois; ,</i>                                                                                                                                                                                                                                                                                                                                                                                                                                                                                                                                                                                                                              |
| Sauces and spices | <i>Ketchup; Molho de tomate; Mostarda molho; Shoyo; Canela; Sal; ,</i>                                                                                                                                                                                                                                                                                                                                                                                                                                                                                                                                                                                                                                                                                                                                                                                                                                                                                                                                     |
| Oilseeds          | <i>Coco seco ; Chia ; Coco verde ; Castanha do Brasil ; Licuri ; Castanhas não especificadas ; Castanhas e sementes, mistura; Tahini, pasta; Amendoim (em grão) (in natura) ; Castanha do Pará ; Castanha de Caju; Noz ; Amêndoa ; Coco não especificado ; ,</i>                                                                                                                                                                                                                                                                                                                                                                                                                                                                                                                                                                                                                                                                                                                                           |
| Fats and oils     | <i>Margarina com ou sem sal; Leite de coco; Azeite de oliva; Toucinho; Azeitona; Manteiga com ou sem sal; Maionese (molho); Bacon; Oleo de coco; Torresmo; Margarina light; ,</i>                                                                                                                                                                                                                                                                                                                                                                                                                                                                                                                                                                                                                                                                                                                                                                                                                          |
| Eggs              | <i>Ovo de galinha; Ovos mexidos; Omelete; Ovo de codorna; Omelete com legumes; Omelete com carne; Omelete com queijo e presunto; ,</i>                                                                                                                                                                                                                                                                                                                                                                                                                                                                                                                                                                                                                                                                                                                                                                                                                                                                     |

| Group                     | Food items included (in Portuguese)                                                                                                                                                                                                                                                                                                                                                                                                                                                                                                                                                                                                                                                                                                                                                                                                                                                                                                                                                                                                                                                                                                                                                                                                                                                                                                                                                                                                                                                                                                                                                                                                                                        |
|---------------------------|----------------------------------------------------------------------------------------------------------------------------------------------------------------------------------------------------------------------------------------------------------------------------------------------------------------------------------------------------------------------------------------------------------------------------------------------------------------------------------------------------------------------------------------------------------------------------------------------------------------------------------------------------------------------------------------------------------------------------------------------------------------------------------------------------------------------------------------------------------------------------------------------------------------------------------------------------------------------------------------------------------------------------------------------------------------------------------------------------------------------------------------------------------------------------------------------------------------------------------------------------------------------------------------------------------------------------------------------------------------------------------------------------------------------------------------------------------------------------------------------------------------------------------------------------------------------------------------------------------------------------------------------------------------------------|
| Bread and bakery products | <p><i>Pão francês; Pão de sal; Pão com manteiga; Pão de forma industrializado de qualquer marca; Bisnaguinha; Pão com margarina; Torrada de qualquer Pão; Pão não especificado; Pãozinho; Pão careca; Pão de batata; Pão caseiro; Pão de trigo; Pão de hamburger; Pão de milho; Pão para wrap; Torrada doce; Pão integral; Pão arabe integral; Torrada integral; Pão de sal integral; Pão frances integral; Pão doce; Rosca doce; Panetone; Pão de leite; Pão doce com recheio; Pão de mel; Pão doce sem recheio; Bolo de chocolate; Bolo de milho ; Bolo de trigo; Bolo simples; Bolo de cenoura; Bolo de laranja; Bolo de mandioca ; Bolo doce com recheio e cobertura; Bolo de banana; Bolo de fubá; Bolo de tapioca ; Bolo de coco; Bolo de aipim ; Bolo de limao; Filhos (bolinho de farinha de trigo e ovos); Bolo de chocolate com recheio e cobertura; Bolo de cara; Bolo de arroz ; Bolo de cenoura sem recheio com cobertura; Tortas doces de qualquer sabor; Biscoito doce; Bolacha doce; Rosquinha doce; Broa; Biscoito salgado; Bolacha salgada; Biscoito de polvilho; Biscoito não especificado; Biscoito salgado integral; Biscoito recheado; Bolacha recheada; Salgadinho de milho (tipo doritos, fandangos, cheetos); Salgadinho batata chips (tipo ruffles); Chips (salgadinhos); Biscoito waffer / wafer light; Bolo diet simples; Bolacha salgada light; Pão integral light; Brioche; ,</i></p>                                                                                                                                                                                                                                                        |
| Snack foods               | <p><i>Pizza; Pizza calabreza; Pizza de frango com catupiry; Pizza portuguesa; Pizza de queijos; Pizza mucarela / mussarela; Pão de queijo; Tapioca salgada recheada; Nuggets de frango; Salgadinho; Tapioca recheada com queijo; Tapioca recheio não-especificado; Pastel (queijo, carne, palmito, etc); Enroladinho; Tranca salgada recheada; Tapioca recheada com carne e queijo; Rosca recheada; Rissole / rizole (queijo, carne, camarao, etc); Empada (queijo, carne, camarao, etc); Pastel de forno/ pastel assado (queijo, carne, palmito, etc); Mini pastel; Mini chicken empanado; Croissant com recheio salgado; Esfirra; Bolinho de aipim; Coxinha; Quibe; Esfirra de carne; Esfirra de frango; Bolinha de queijo; Cachorro quente; Misto quente ou frio; Pão com queijo; Hamburger (sanduiche); Pão com mortadela; Pão com ovo; Pão com queijo e presunto; Wrap de carne; Sanduiche natural; Sanduiche de carne assada; Sanduiche de queijo prato com presunto; Sanduiche de queijo; Pão com presunto; Pão com carne assada; Pão com salame; Sanduiche de atum; Sanduiche de file; Pão com peito de peru; X-bacon; Sanduiche bauru; Wrap frango ou galinha; Sanduiche de presunto; Sanduiche de mortadela; Pão com rosbife; Americano; Cachorro quente completo; Sanduiche de queijo minas; Sanduiche de queijo prato; Sanduiche de peito de peru; Queijo quente; Tortas salgadas de qualquer sabor; Escondidinho de carne seca; Escondidinho de carne; Cuscuz paulista; Cuscuz de legumes; Quiche de peixes (salmao, atum, sardinha etc); Torta de frango ou galinha; Torta de carne; Torta de peixe / atum / sardinha; Torta de presunto e queijo; ,</i></p> |
| Mixed preparations        | <p><i>Mexido; Creme de queijo; Cozido; Salada de maionese; Batata com molho branco e queijo; Cuscuz de arroz; ,</i></p>                                                                                                                                                                                                                                                                                                                                                                                                                                                                                                                                                                                                                                                                                                                                                                                                                                                                                                                                                                                                                                                                                                                                                                                                                                                                                                                                                                                                                                                                                                                                                    |
| Roots and tubers          | <p><i>Batata doce; Batata inglesa; Batata (não especificada); Purê de batata; Batata palito; Batata palha; Mandioca; Pirão; Inhame; Beterraba; Nabo; ,</i></p>                                                                                                                                                                                                                                                                                                                                                                                                                                                                                                                                                                                                                                                                                                                                                                                                                                                                                                                                                                                                                                                                                                                                                                                                                                                                                                                                                                                                                                                                                                             |
| Soups                     | <p><i>Canja; Caldo de carne; Caldo de feijao; Sopa (legumes, carne, etc); Sopa / creme de abobora; Sopa de feijao; Sopa de frango com legumes; Sopa de legumes; Sopa / caldo de mandioca / mandioquinha / batata baroa / inhame; Sopa de legumes macarrao e carne; Sopa / creme de ervilha; ,</i></p>                                                                                                                                                                                                                                                                                                                                                                                                                                                                                                                                                                                                                                                                                                                                                                                                                                                                                                                                                                                                                                                                                                                                                                                                                                                                                                                                                                      |

| Group            | <i>Food items included (in Portuguese)</i>                                                                                                                                                                                                                                                                                                                                                            |
|------------------|-------------------------------------------------------------------------------------------------------------------------------------------------------------------------------------------------------------------------------------------------------------------------------------------------------------------------------------------------------------------------------------------------------|
| Supplements      | <i>Complemento alimentar de qualquer sabor; Suplemento proteico e outros; Concentrado alimentar diet shake; Diet shake; Sustagem; Vitaminas, minerais e outros; ,</i>                                                                                                                                                                                                                                 |
| Green vegetables | <i>Alface; Couve; Repolho; Repolho roxo; Repolho verde; Vinagrete; Salada ou verdura crua, exceto de fruta; Salada de alface, tomate e cebola; Salada de folhas; Salada de rúcula e tomate seco; Salada de tomate; Chicória; Couve-flor; Mostarda (verdura); Agrião; Acelga; Brócolis; Rúcula; Aspargos fresco; Vegetais folhosos não especificados; Salada ou verdura cozida, exceto de fruta; ,</i> |

## B. Food items by dietary pattern

| Diet  | Food items included (in Portuguese)                                                                                                                                                                                                                                                                                                                                                                                                                                                                                                                                                                                                                                                                                                                                                                                                                                                                                                                                                                                                                                                                                                                                                                                                                                                                                                                                                                                                                                                                                                                                                                                                                                                                                                                                                                                                                                                                                                                                                                                                                                                                                                                                                                                                                                                                                                                                                                                                                                                                                                                                                                                                                                                                                                                                                                                                                                                                                                                                                                                                                                                                                                                                                                                                                                                                                                                                                                                                                                                                                                                                                                                                                                                                                                                                                                                                                                                                                                |
|-------|------------------------------------------------------------------------------------------------------------------------------------------------------------------------------------------------------------------------------------------------------------------------------------------------------------------------------------------------------------------------------------------------------------------------------------------------------------------------------------------------------------------------------------------------------------------------------------------------------------------------------------------------------------------------------------------------------------------------------------------------------------------------------------------------------------------------------------------------------------------------------------------------------------------------------------------------------------------------------------------------------------------------------------------------------------------------------------------------------------------------------------------------------------------------------------------------------------------------------------------------------------------------------------------------------------------------------------------------------------------------------------------------------------------------------------------------------------------------------------------------------------------------------------------------------------------------------------------------------------------------------------------------------------------------------------------------------------------------------------------------------------------------------------------------------------------------------------------------------------------------------------------------------------------------------------------------------------------------------------------------------------------------------------------------------------------------------------------------------------------------------------------------------------------------------------------------------------------------------------------------------------------------------------------------------------------------------------------------------------------------------------------------------------------------------------------------------------------------------------------------------------------------------------------------------------------------------------------------------------------------------------------------------------------------------------------------------------------------------------------------------------------------------------------------------------------------------------------------------------------------------------------------------------------------------------------------------------------------------------------------------------------------------------------------------------------------------------------------------------------------------------------------------------------------------------------------------------------------------------------------------------------------------------------------------------------------------------------------------------------------------------------------------------------------------------------------------------------------------------------------------------------------------------------------------------------------------------------------------------------------------------------------------------------------------------------------------------------------------------------------------------------------------------------------------------------------------------------------------------------------------------------------------------------------------------|
| Vegan | <p>Macarrão com legumes ; Salada de legumes, verduras e frutas; Cuscuz de arroz; Refogadinho de legumes; Legumes gratinados; Bolinho de arroz; Batata, cenoura e chuchu; Arroz de brócolis / couve; Arroz com lentilha; Arroz com legumes; Pão com margarina; Arroz com feijão; Lasanha / lasanha de beringela; Salada de legumes e verduras; Salada de tomate; Salada de legumes; Salada de rúcula e tomate seco; Salada de folhas; Salada de alface, tomate e cebola; Salada ou verdura crua, exceto de fruta; Açaí com guaraná e granola; Açaí; Caldo verde; Farofa de banana; Cuscuz marroquino; Cuscuz de legumes; Arroz à grega ; Sopa / creme de ervilha; Sopa / caldo de mandioca / mandioquinha / batata baroa / inhame; Sopa de legumes; Sopa de feijão; Sopa / creme de abobora; Salada de frutas; Caldo de feijão; Farofa pronta; Farofa de couve; Farofa; Batata palha; Batata palito; Milho cozido; Café tipo expresso; Café; Pipoca doce ou salgada; Macarronada; Salada ou verdura cozida, exceto de fruta; Refresco de limão; Refresco de maracujá; Refresco de laranja; Refresco de caju; Refresco; Suco de pessego; Suco de morango; Suco de maracujá; Suco de manga; Suco de laranja; Suco de goiaba; Suco de cupuacu; Suco de acerola; Suco de abacaxi; Suco; Angu de milho; Óleo de coco; Azeite de oliva; Cerveja; Suco de uva; Suco de tamarindo; Suco de caja/ mangaba/ tapereba e outros regionais; Suco natural, mistura de frutas e vegetais; Suco natural, mistura de frutas; Suco natural de vegetais; Suco natural de fruta; Limonada; Ice tea tradicional; Água; Suco verde; Suco detox; Chá, ervas não especificado; Chá verde, chá branco, chá vermelho; Chá (preto, camomila, erva cidreira, capim limão, etc); Chá diet (preto, camomila, erva cidreira, capim limão, etc); Cevada em pó; Refrigerante não especificado; Chimarrão; Chá mate; Água de coco; Bebida refrigerante, tipo h2o; Água mineral com gás; Água mineral sem gás; Água mineral; Refrigerante de cola light; Refrigerante de uva tradicional; Refrigerante de limão tradicional; Sprite refrigerante tradicional; Refresco de guaraná natural; Guaraná tradicional; Refrigerante de guaraná tradicional; Refrigerante de laranja tradicional; Fanta laranja tradicional; Coca cola tradicional; Refrigerante de cola tradicional; Tapioca; Pão caseiro; Pão para wrap; Torrada integral; Pão não especificado; Pão francês integral; Pão de sal integral; Pão árabe integral; Pão integral; Pão de milho; Pãozinho; Pão de trigo; Pão de sal; Pão francês; Leite de soja em pó; Tofu; Leite de soja com sabor; Nabo em conserva; Picles; Milho verde em conserva; Petit pois; Azeitona; Vinagrete; Gergelim; Leite de coco; Açúcar; Beijú; Amendoim apimentado; Cuscuz; Fruta seca ou desidratada; Melado; Rapadura; Damasco; Lichia; Abricó; Kiwi; Acerola; Pitanga; Pequi; Sapoti; Morango; Jabuticaba / jaboticaba; Cajá manga; Cereja; Ameixa; Goiaba; Jaca; Uva passa; Uva; Pinha (fruta de conde); Fruta de conde; Pêssego; Pêra; Melão; Melancia; Manga; Papaia ; Mamão; Maçã; Caqui; Abacate; Abacaxi; Mexerica; Tangerina; Limão (comum, galego, etc); Laranja (pêra, seleta, lima, da terra, etc); Banana (ouro, prata, d'água, etc); Banana da terra; Vegetais não especificados; Vegetais folhosos não especificados; Aspargos fresco; Alho; Cebola; Ervilha em vagem; Berinjela / beringela; Vagem; Tomate; Quiabo; Pimenta malagueta; Pimentão; Palmito in natura; Maxixe; Jiló; Chuchu; Pepino; Abóbora; Abobrinha; Rúcula; Brócolis; Acelga; Agrião; Repolho verde; Repolho roxo; Repolho; Mostarda (verdura); Couve flor; Couve; Chicória; Alface; Tahini, pasta; Castanhas e sementes, mistura; Castanhas não especificadas ; Coco não especificado ; Noz ; Licuri ; Castanha de Caju; Castanha do Brasil ; Castanha do Pará ; Amêndoa ; Coco verde ; Coco seco ; Massa/macarrão integral; Salada de</p> |

| Diet       | Food items included (in Portuguese)                                                                                                                                                                                                                                                                                                                                                                                                                                                                                                                                                                                                                                                                                                                                                                                                                                                                                                                                                                                                                                                                                                                                                                                                                                                                                                                                                                                                                                                                                                                                                                                                                                                                                                                                                                                                                                                                                                                                                                                                                                                                                                                                                                                                                                                                                                                                                                                                                                                                                                                                                                                                                                                                                                                                                                                                                                                                                                                                                                                                                                                                                                                                                                                                                                                                                                          |
|------------|----------------------------------------------------------------------------------------------------------------------------------------------------------------------------------------------------------------------------------------------------------------------------------------------------------------------------------------------------------------------------------------------------------------------------------------------------------------------------------------------------------------------------------------------------------------------------------------------------------------------------------------------------------------------------------------------------------------------------------------------------------------------------------------------------------------------------------------------------------------------------------------------------------------------------------------------------------------------------------------------------------------------------------------------------------------------------------------------------------------------------------------------------------------------------------------------------------------------------------------------------------------------------------------------------------------------------------------------------------------------------------------------------------------------------------------------------------------------------------------------------------------------------------------------------------------------------------------------------------------------------------------------------------------------------------------------------------------------------------------------------------------------------------------------------------------------------------------------------------------------------------------------------------------------------------------------------------------------------------------------------------------------------------------------------------------------------------------------------------------------------------------------------------------------------------------------------------------------------------------------------------------------------------------------------------------------------------------------------------------------------------------------------------------------------------------------------------------------------------------------------------------------------------------------------------------------------------------------------------------------------------------------------------------------------------------------------------------------------------------------------------------------------------------------------------------------------------------------------------------------------------------------------------------------------------------------------------------------------------------------------------------------------------------------------------------------------------------------------------------------------------------------------------------------------------------------------------------------------------------------------------------------------------------------------------------------------------------------|
|            | <p>macarrão; Proteína de soja; Granola; Purê de batata; Macarrão; Fibra de soja; Tapioca de goma ; Farinha de tapioca ; Cereal matinal de milho em flocos; Sucrilhos de milho; Aveia em flocos; Farinha de aveia; Gengibre; Nabo; Cenoura; Beterraba; Batata (não especificada); Mandioca; Inhame; Batata doce; Batata inglesa; Chia ; Feijão (preto, mulatinho, roxo, rosinha, etc); Lentilha; Grão de bico; Andu; Linhaça ; Feijão verde; Feijão de corda; Ervilha em grão; Amendoim (em grão) (in natura) ; Arroz 7 grãos; Arroz integral; Arroz branco; Arroz (polido, parboilizado, agulha, agulhinha, etc)</p>                                                                                                                                                                                                                                                                                                                                                                                                                                                                                                                                                                                                                                                                                                                                                                                                                                                                                                                                                                                                                                                                                                                                                                                                                                                                                                                                                                                                                                                                                                                                                                                                                                                                                                                                                                                                                                                                                                                                                                                                                                                                                                                                                                                                                                                                                                                                                                                                                                                                                                                                                                                                                                                                                                                         |
| Vegetarian | <p>Strogonoff / estrogonofe de carne de soja; Macarrão cremoso/sugo/tomate; Macarrão com molho branco; Macarrão com legumes ; Macarã ao alho e óleo; Macarrão com queijo; Salada de legumes, verduras e frutas; Cuscuz de arroz; Refogadinho de legumes; Legumes gratinados; Bolinho de arroz; Bolinha de queijo; Batata, cenoura e chuchu; Batata com molho branco e queijo; Arroz de brócolis / couve; Arroz com macarrão / aletria / alitria / cabelo de anjo; Arroz com lentilha; Arroz com legumes; Arroz de leite; Pão com margarina; Pão com manteiga; Arroz com feijão; Lasanha / lasanha de berinjela; Salada de legumes e verduras; Salada de tomate; Salada de legumes; Salada de rúcula e tomate seco; Salada de folhas; Salada de alface, tomate e cebola; Salada ou verdura crua, exceto de fruta; Açaí com guaraná e granola; Açaí; Caldo verde; Omelete com queijo e presunto; Omelete com legumes; Omelete com carne; Omelete; Farofa de banana; Cuscuz marroquino; Cuscuz de legumes; Cuscuz paulista; Arroz à grega ; Sopa / creme de ervilha; Sopa / caldo de mandioca / mandioquinha / batata baroa / inhame; Sopa de legumes; Sopa de feijão; Sopa / creme de abóbora; Salada de frutas; Caldo de feijão; Farofa pronta; Mingau (fuba, aveia, farinha, etc); Farofa de couve; Farofa com ovos; Farofa; Batata palha; Batata palito; Milho cozido; Café tipo capuccino; Café tipo expresso; Café com leite; Café; Pipoca doce ou salgada; Pizza napolitana; Pizza de queijos; Macarronada; Pizza muçarela / mussarela; Panqueca; Salada de maionese; Salada ou verdura cozida, exceto de fruta; Refresco tang; Refresco de limão; Refresco de maracujá; Refresco de laranja; Refresco de caju; Refresco; Vitamina de fruta com leite e cereal; Vitamina mista; Vitamina de morango; Vitamina de abacate; Vitamina de mamão; Vitamina de banana com aveia; Vitamina de banana; Vitamina; Suco de pêssego; Suco de morango; Suco de maracujá; Suco de manga; Suco de laranja; Suco de goiaba; Suco de cupuacu; Suco de acerola; Suco de abacaxi; Suco; Polenta; Angu de milho; Óleo de coco; Azeite de oliva; Cerveja; Suco de uva; Suco de tamarindo; Suco de caja/ mangaba/ tapereba e outros regionais; Suco natural, mistura de frutas e vegetais; Suco natural, mistura de frutas; Suco natural de vegetais; Suco natural de fruta; Limonada; Ice tea tradicional; Água; Suco verde; Suco detox; Chá, ervas não especificado; Chá verde, chá branco, chá vermelho; Chá (preto, camomila, erva cidreira, capim limão, etc); Chá diet (preto, camomila, erva cidreira, capim limão, etc); Cevada em pó; Refrigerante não especificado; Chamarão; Chá mate; Q-suco; Água de coco; Bebida refrigerante, tipo H<sub>2</sub>O; Água mineral com gás; Água mineral sem gás; Água mineral; Refrigerante de cola light; Refrigerante de uva tradicional; Refrigerante de limão tradicional; Sprite refrigerante tradicional; Refresco de guarana natural; Guarana tradicional; Refrigerante de guarana tradicional; Refrigerante de laranja tradicional; Fanta laranja tradicional; Coca cola tradicional; Refrigerante de cola tradicional; Tapioca; Pão caseiro; Pão de batata; Pão para wrap; Crepe; Brioche; Torrada integral; Torrada doce; Torrada de qualquer Pão; Pão não especificado; Pão francês integral; Pão</p> |

| Diet        | Food items included (in Portuguese)                                                                                                                                                                                                                                                                                                                                                                                                                                                                                                                                                                                                                                                                                                                                                                                                                                                                                                                                                                                                                                                                                                                                                                                                                                                                                                                                                                                                                                                                                                                                                                                                                                                                                                                                                                                                                                                                                                                                                                                                                                                                                                                                                                                                                                                                                                                                                                                                                                                                                                                                                                                                                                                                                                                                                                                                                                                                                                                                                                                                                                                                                                                                                                                                                                                           |
|-------------|-----------------------------------------------------------------------------------------------------------------------------------------------------------------------------------------------------------------------------------------------------------------------------------------------------------------------------------------------------------------------------------------------------------------------------------------------------------------------------------------------------------------------------------------------------------------------------------------------------------------------------------------------------------------------------------------------------------------------------------------------------------------------------------------------------------------------------------------------------------------------------------------------------------------------------------------------------------------------------------------------------------------------------------------------------------------------------------------------------------------------------------------------------------------------------------------------------------------------------------------------------------------------------------------------------------------------------------------------------------------------------------------------------------------------------------------------------------------------------------------------------------------------------------------------------------------------------------------------------------------------------------------------------------------------------------------------------------------------------------------------------------------------------------------------------------------------------------------------------------------------------------------------------------------------------------------------------------------------------------------------------------------------------------------------------------------------------------------------------------------------------------------------------------------------------------------------------------------------------------------------------------------------------------------------------------------------------------------------------------------------------------------------------------------------------------------------------------------------------------------------------------------------------------------------------------------------------------------------------------------------------------------------------------------------------------------------------------------------------------------------------------------------------------------------------------------------------------------------------------------------------------------------------------------------------------------------------------------------------------------------------------------------------------------------------------------------------------------------------------------------------------------------------------------------------------------------------------------------------------------------------------------------------------------------|
|             | <p>de sal integral; Pão arabe integral; Pão integral; Pão de milho; Pão de forma industrializado de qualquer marca; Bisnaguinha; Pãozinho; Pão careca; Pão de trigo; Pão de sal; Pão de hamburger; Pão francês; Kefir; Leite sem lactose; Queijo não especificado light; Requeijao light; Queijo de minas light; Queijo mussarela / mucarela light; Iogurte de qualquer sabor light; Leite não especificado pasteurizado; Leite de vaca semidesnatado; Leite de vaca desnatado; Leite de soja em po; Tofu; Bebida achocolatada; Leite aromatizado; Leite achocolatado; Leite com sabor; Queijo não especificado; Queijo cremoso; Requeijao; Queijo polenguinho; Queijo ralado; Leite de soja com sabor; Queijo ricota; Queijo canastra; Queijo de coalho; Queijo de minas; Mussarela / mucarela; Queijo muzarella; Queijo colonial; Queijo prato; Manteiga com ou sem sal; Coalhada; Leite fermentado; Bebida lactea; Yakult de qualquer sabor; Iogurte natural; Iogurte desnatado; Iogurte de qualquer sabor; Creme de leite; Leite em po; Leite em po integral; Leite de vaca fresco; Leite de vaca integral; Ovos mexidos; Ovo de codorna; Ovo de galinha; Nabo em conserva; Picles; Milho verde em conserva; Petit pois; Azeitona; Vinagrete; Gergelim; Creme de queijo; Leite de coco; Toddyinho diet; Açúcar; Pamonha; Beijú; Amendoim apimentado; Cuscuz; Fruta seca ou desidratada; Melado; Toddyinho; Rapadura; Damasco; Lichia; Abriçó; Kiwi; Acerola; Pitanga; Pequi; Sapoti; Morango; Jabuticaba / jaboticaba; Cajá manga; Cereja; Ameixa; Goiaba; Jaca; Uva passa; Uva; Pinha (fruta de conde); Fruta de conde; Pêssego; Pêra; Melão; Melancia; Manga; Papaia ; Mamão; Maçã; Caqui; Abacate; Abacaxi; Mexerica; Tangerina; Limão (comum, galego, etc); Laranja (pêra, seleta, lima, da terra, etc); Banana (ouro, prata, d'água, etc); Banana da terra; Vegetais não especificados; Vegetais folhosos não especificados; Aspargos fresco; Alho; Cebola; Ervilha em vagem; Berinjela / beringela; Vagem; Tomate; Quiabo; Pimenta malagueta; Pimentão; Palmito in natura; Maxixe; Jiló; Chuchu; Pepino; Abóbora; Abobrinha; Rúcula; Brócolis; Acelga; Agrião; Repolho verde; Repolho roxo; Repolho; Mostarda (verdura); Couve flor; Couve; Chicória; Alface; Tahini, pasta; Castanhas e sementes, mistura; Castanhas não especificadas ; Coco não especificado ; Noz ; Licuri ; Castanha de Caju; Castanaha do Brasil ; Castanha do Pará ; Amêndoa ; Coco verde ; Coco seco ; Massa/macarrão integral; Salada de macarrão; Proteína de soja; Macarrão instantâneo; Miojo; Granola; Purê de abóbora / jerimum / gerimum; Purê de batata; Macarrão; Fibra de soja; Farinha lactea; Tapioca de goma ; Farinha de tapioca ; Cereal matinal de milho em flocos; Sucrilhos de milho; Mingau de maizena; Mingau de milho; Aveia em flocos; Farinha de aveia; Mingau de arroz; Mucilon; Gengibre; Nabo; Cenoura; Beterraba; Batata (não especificada); Mandioca; Inhamé; Batata doce; Batata inglesa; Chia ; Feijão (preto, mulatinho, roxo, rosinha, etc); Lentilha; Grão de bico; Andu; Linhaça ; Feijão verde; Feijão de corda; Ervilha em grão; Amendoim (em grão) (in natura) ; Arroz 7 grãos; Arroz integral; Arroz branco; Arroz (polido, parboilizado, agulha, agulhinha, etc)</p> |
| Pescatarian | <p>Torta de peixe / atum / sardinha; Torta de camarão / frutos do mar; Stroganoff / estrogonofe de carne de soja; Macarrão cremoso/sugo/tomate; Macarrão com molho branco; Macarrão com legumes ; Macarão ao alho e óleo; Macarrão com queijo; Macarrão com camarão; Salada de legumes, verduras e frutas; Cuscuz de arroz; Temaki; Refogadinho de legumes; Quiche de peixes (salmao, atum, sardinha etc); Peixe ao leite de coco; Peixe ensopado com batatas; Peixe assado com legumes e batatas; Legumes gratinados; Camarao com molho branco; Bolinho de arroz; Bolinha de queijo; Batata, cenoura e chuchu; Batata com molho branco e queijo; Arroz de brócolis</p>                                                                                                                                                                                                                                                                                                                                                                                                                                                                                                                                                                                                                                                                                                                                                                                                                                                                                                                                                                                                                                                                                                                                                                                                                                                                                                                                                                                                                                                                                                                                                                                                                                                                                                                                                                                                                                                                                                                                                                                                                                                                                                                                                                                                                                                                                                                                                                                                                                                                                                                                                                                                                       |



| Diet | Food items included (in Portuguese)                                                                                                                                                                                                                                                                                                                                                                                                                                                                                                                                                                                                                                                                                                                                                                                                                                                                                                                                                                                                                                                                                                                                                                                                                                                                                                                                                                                                                                                                                                                                                                                                                                                                                                                                                                                                                                                                                                                                                                                                                                                                                                                                                                                                                                                                                                                                                                                                                                                                                                                                                                                                                                                                                                                                                                                                                                                                                                                                                                                                                                                                                                                                                                                                                                                                                                                                                                                                                                                                                                                                                                                                                                                                                                                                                                                                                                                                                                                                                                           |
|------|---------------------------------------------------------------------------------------------------------------------------------------------------------------------------------------------------------------------------------------------------------------------------------------------------------------------------------------------------------------------------------------------------------------------------------------------------------------------------------------------------------------------------------------------------------------------------------------------------------------------------------------------------------------------------------------------------------------------------------------------------------------------------------------------------------------------------------------------------------------------------------------------------------------------------------------------------------------------------------------------------------------------------------------------------------------------------------------------------------------------------------------------------------------------------------------------------------------------------------------------------------------------------------------------------------------------------------------------------------------------------------------------------------------------------------------------------------------------------------------------------------------------------------------------------------------------------------------------------------------------------------------------------------------------------------------------------------------------------------------------------------------------------------------------------------------------------------------------------------------------------------------------------------------------------------------------------------------------------------------------------------------------------------------------------------------------------------------------------------------------------------------------------------------------------------------------------------------------------------------------------------------------------------------------------------------------------------------------------------------------------------------------------------------------------------------------------------------------------------------------------------------------------------------------------------------------------------------------------------------------------------------------------------------------------------------------------------------------------------------------------------------------------------------------------------------------------------------------------------------------------------------------------------------------------------------------------------------------------------------------------------------------------------------------------------------------------------------------------------------------------------------------------------------------------------------------------------------------------------------------------------------------------------------------------------------------------------------------------------------------------------------------------------------------------------------------------------------------------------------------------------------------------------------------------------------------------------------------------------------------------------------------------------------------------------------------------------------------------------------------------------------------------------------------------------------------------------------------------------------------------------------------------------------------------------------------------------------------------------------------------------------|
|      | <p>/ couve; Arroz com macarrão / aletria / alitria / cabelo de anjo; Arroz com lentilha; Arroz com legumes; Arroz de leite; Pão com margarina; Pão com manteiga; Arroz com feijão; Lasanha / lasanha de beringela; Salada de legumes e verduras; Salada de tomate; Salada de legumes; Salada de rúcula e tomate seco; Salada de folhas; Salada de alface, tomate e cebola; Salada ou verdura crua, exceto de fruta; Açaí com guaraná e granola; Açaí; Caldo verde; Pirão; Omelete com queijo e presunto; Omelete com legumes; Omelete com carne; Omelete; Farofa de banana; Cuscuz marroquino; Cuscuz de legumes; Cuscuz paulista; Bobo de camara; Arroz à grega ; Sopa / creme de ervilha; Sopa / caldo de mandioca / mandioquinha / batata baroa / inhame; Sopa de legumes; Sopa de feijão; Sopa / creme de abobora; Salada de frutas; Sushi; Caldo de feijão; Farofa pronta; Risoto; Mingau (fuba, aveia, farinha, etc); Farofa de couve; Farofa com ovos; Farofa; Batata palha; Batata palito; Milho cozido; Cafe tipo capuccino; Cafe tipo expresso; Cafe com leite; Cafe; Pipoca doce ou salgada; Pizza de peixe (atum, salmao, sardinha); Pizza napolitana; Pizza de queijos; Macarronada; Pizza mucarela / mussarela; Panqueca; Salada de maionese; Salada ou verdura cozida, exceto de fruta; Refresco tang; Refresco de limao; Refresco de maracuja; Refresco de laranja; Refresco de caju; Refresco; Vitamina de fruta com leite e cereal; Vitamina mista; Vitamina de morango; Vitamina de abacate; Vitamina de mamao; Vitamina de banana com aveia; Vitamina de banana; Vitamina; Suco de pessego; Suco de morango; Suco de maracuja; Suco de manga; Suco de laranja; Suco de goiaba; Suco de cupuacu; Suco de acerola; Suco de abacaxi; Suco; Polenta; Angu de milho; Oleo de coco; Azeite de oliva; Cerveja; Suco de uva; Suco de tamarindo; Suco de caja/ mangaba/ tapereba e outros regionais; Suco natural, mistura de frutas e vegetais; Suco natural, mistura de frutas; Suco natural de vegetais; Suco natural de fruta; Limonada; Ice tea tradicional; Agua; Suco verde; Suco detox; Cha, ervas não especificado; Cha verde, cha branco, cha vermelho; Cha (preto, camomila, erva cidreira, capim limao, etc); Cha diet (preto, camomila, erva cidreira, capim limao, etc); Cevada em po; Refrigerante não especificado; Chimarrao; Cha mate; Q-suco; Agua de coco; Bebida refrigerante, tipo h2o; Agua mineral com gas; Agua mineral sem gas; Agua mineral; Refrigerante de cola light; Refrigerante de uva tradicional; Refrigerante de limao tradicional; Sprite refrigerante tradicional; Refresco de guarana natural; Guarana tradicional; Refrigerante de guarana tradicional; Refrigerante de laranja tradicional; Fanta laranja tradicional; Coca cola tradicional; Refrigerante de cola tradicional; Tapioca; Pão caseiro; Pão de batata; Pão para wrap; Crepe; Brioche; Torrada integral; Torrada doce; Torrada de qualquer Pão; Pão não especificado; Pão frances integral; Pão de sal integral; Pão arabe integral; Pão integral; Pão de milho; Pão de forma industrializado de qualquer marca; Bisnaguinha; Pãozinho; Pão careca; Pão de trigo; Pão de sal; Pão de hamburger; Pão francês; Kefir; Leite sem lactose; Queijo não especificado light; Requeijao light; Queijo de minas light; Queijo mussarela / mucarela light; Iogurte de qualquer sabor light; Leite não especificado pasteurizado; Leite de vaca semidesnatado; Leite de vaca desnatado; Leite de soja em po; Tofu; Bebida achocolatada; Leite aromatizado; Leite achocolatado; Leite com sabor; Queijo não especificado; Queijo cremoso; Requeijao; Queijo polenguinho; Queijo ralado; Leite de soja com sabor; Queijo ricota; Queijo canastra; Queijo de coalho; Queijo de minas; Mussarela / mucarela; Queijo muzarella; Queijo colonial; Queijo prato; Manteiga com ou sem sal; Coalhada; Leite fermentado; Bebida lactea; Yakult de qualquer sabor; Iogurte natural; Iogurte desnatado; Iogurte</p> |

| Diet        | Food items included (in Portuguese)                                                                                                                                                                                                                                                                                                                                                                                                                                                                                                                                                                                                                                                                                                                                                                                                                                                                                                                                                                                                                                                                                                                                                                                                                                                                                                                                                                                                                                                                                                                                                                                                                                                                                                                                                                                                                                                                                                                                                                                                                                                                                                                                                                                                                                                                                                                                                                                                                                                                                                                                                                                                                                                                |
|-------------|----------------------------------------------------------------------------------------------------------------------------------------------------------------------------------------------------------------------------------------------------------------------------------------------------------------------------------------------------------------------------------------------------------------------------------------------------------------------------------------------------------------------------------------------------------------------------------------------------------------------------------------------------------------------------------------------------------------------------------------------------------------------------------------------------------------------------------------------------------------------------------------------------------------------------------------------------------------------------------------------------------------------------------------------------------------------------------------------------------------------------------------------------------------------------------------------------------------------------------------------------------------------------------------------------------------------------------------------------------------------------------------------------------------------------------------------------------------------------------------------------------------------------------------------------------------------------------------------------------------------------------------------------------------------------------------------------------------------------------------------------------------------------------------------------------------------------------------------------------------------------------------------------------------------------------------------------------------------------------------------------------------------------------------------------------------------------------------------------------------------------------------------------------------------------------------------------------------------------------------------------------------------------------------------------------------------------------------------------------------------------------------------------------------------------------------------------------------------------------------------------------------------------------------------------------------------------------------------------------------------------------------------------------------------------------------------------|
|             | <p><i>de qualquer sabor; Creme de leite; Leite em po; Leite em po integral; Leite de vaca fresco; Leite de vaca integral; Ovos mexidos; Ovo de codorna; Ovo de galinha; Salmao em conserva; Nabo em conserva; Picles; Atum em conserva; Sardinha em conserva; Milho verde em conserva; Petit pois; Azeitona; Peixe não especificado (em posta, em file, etc); Peixe de agua doce salgado (em posta, em file, etc); Peixe de agua doce (em posta, em file, etc); Steak de peixe ; File de peixe; Sashimi; Ceviche de peixe; Bacalhau; Peixe salgado (em posta, em file, etc); Peixe do mar (em posta, em file, etc); Vinagrete; Gergelim; Creme de queijo; Leite de coco; Toddyinho diet; Açúcar; Pamonha; Beiju; Amendoim apimentado; Cuscuz; Fruta seca ou desidratada; Melado; Toddyinho; Rapadura; Damasco; Lichia; Abrió; Kiwi; Acerola; Pitanga; Pequi; Sapoti; Morango; Jabuticaba / jaboticaba; Cajá manga; Cereja; Ameixa; Goiaba; Jaca; Uva passa; Uva; Pinha (fruta de conde); Fruta de conde; Pêssego; Pêra; Melão; Melancia; Manga; Papaia ; Mamão; Maçã; Caqui; Abacate; Abacaxi; Mexerica; Tangerina; Limão (comum, galego, etc); Laranja (pêra, seleta, lima, da terra, etc); Banana (ouro, prata, d'água, etc); Banana da terra; Vegetais não especificados; Vegetais folhosos não especificados; Aspargos fresco; Alho; Cebola; Ervilha em vagem; Berinjela / beringela; Vagem; Tomate; Quiabo; Pimenta malagueta; Pimentão; Palmito in natura; Maxixe; Jiló; Chuchu; Pepino; Abóbora; Abobrinha; Rúcula; Brócolis; Acelga; Agrião; Repolho verde; Repolho roxo; Repolho; Mostarda (verdura); Couve flor; Couve; Chicória; Alface; Tahini, pasta; Castanhas e sementes, mistura; Castanhas não especificadas ; Coco não especificado ; Noz ; Licuri ; Castanha de Caju; Castanaha do Brasil ; Castanha do Pará ; Amêndoa ; Coco verde ; Coco seco ; Massa/macarrão integral; Salada de macarrão; Macarrão com peixe ; Proteína de soja; Macarrão instantâneo; Miojo; Granola; Purê de abóbora / jerimum / gerimum; Purê de batata; Macarrão; Fibra de soja; Farinha lactea; Tapioca de goma ; Farinha de tapioca ; Cereal matinal de milho em flocos; Sucrilhos de milho; Mingau de maizena; Mingau de milho; Aveia em flocos; Farinha de aveia; Mingau de arroz; Mucilon; Gengibre; Nabo; Cenoura; Beterraba; Batata (não especificada); Mandioca; Inhame; Batata doce; Batata inglesa; Chia ; Feijão (preto, mulatinho, roxo, rosinha, etc); Lentilha; Grão de bico; Andu; Linhaça ; Feijão verde; Feijão de corda; Ervilha em grão; Amendoim (em grão) (in natura) ; Arroz 7 grãos; Arroz integral; Arroz branco; Arroz (polido, parboilizado, agulha, agulhinha, etc)</i></p> |
| No red meat | <p><i>Torta de peixe / atum / sardinha; Torta de camarao / frutos do mar; Torta de frango ou galinha; Strogonoff / estrogonofe de frango ou galinha; Strogonoff / estrogonofe de carne de soja; Macarrão cremoso/sugo/tomate; Macarrão com molho branco; Macarrão com legumes ; Macarrão com frango ou galinha ; Macarão ao alho e óleo; Macarrão com queijo; Macarrão com camarão; Salada de legumes, verduras e frutas; Cuscuz de arroz; Temaki; Refogadinho de legumes; Quiche de peixes (salmao, atum, sardinha etc); Peixe ao leite de coco; Peixe ensopado com batatas; Peixe assado com legumes e batatas; Legumes gratinados; Fricasse de frango ou galinha; Frango ou galinha ao molho pardo / galinha de cabidela; Frango ou galinha com pequi; Frango ensopado; Frango caipira; Camarao com molho branco; Caldo de pinto; Bolinho de arroz; Bolinha de queijo; Bife de frango ou galinha a parmegiana; Batata, cenoura e chuchu; Batata com molho branco e queijo; Arroz com frango / arroz com capote; Arroz de brócolis / couve; Arroz com macarrão / aletria / alitria / cabelo de anjo; Arroz com lentilha; Arroz com legumes; Arroz com frango e pequi; Arroz de leite; Arroz carreteiro/arroz tropeiro ; Frango com legumes (exceto batata,inhame e</i></p>                                                                                                                                                                                                                                                                                                                                                                                                                                                                                                                                                                                                                                                                                                                                                                                                                                                                                                                                                                                                                                                                                                                                                                                                                                                                                                                                                                                                                       |

| Diet | Food items included (in Portuguese)                                                                                                                                                                                                                                                                                                                                                                                                                                                                                                                                                                                                                                                                                                                                                                                                                                                                                                                                                                                                                                                                                                                                                                                                                                                                                                                                                                                                                                                                                                                                                                                                                                                                                                                                                                                                                                                                                                                                                                                                                                                                                                                                                                                                                                                                                                                                                                                                                                                                                                                                                                                                                                                                                                                                                                                                                                                                                                                                                                                                                                                                                                                                                                                                                                                                                                                                                                                                                                                                                                                                                                                                                                                                                                                                                                                                                                                                                                                                                                                        |
|------|----------------------------------------------------------------------------------------------------------------------------------------------------------------------------------------------------------------------------------------------------------------------------------------------------------------------------------------------------------------------------------------------------------------------------------------------------------------------------------------------------------------------------------------------------------------------------------------------------------------------------------------------------------------------------------------------------------------------------------------------------------------------------------------------------------------------------------------------------------------------------------------------------------------------------------------------------------------------------------------------------------------------------------------------------------------------------------------------------------------------------------------------------------------------------------------------------------------------------------------------------------------------------------------------------------------------------------------------------------------------------------------------------------------------------------------------------------------------------------------------------------------------------------------------------------------------------------------------------------------------------------------------------------------------------------------------------------------------------------------------------------------------------------------------------------------------------------------------------------------------------------------------------------------------------------------------------------------------------------------------------------------------------------------------------------------------------------------------------------------------------------------------------------------------------------------------------------------------------------------------------------------------------------------------------------------------------------------------------------------------------------------------------------------------------------------------------------------------------------------------------------------------------------------------------------------------------------------------------------------------------------------------------------------------------------------------------------------------------------------------------------------------------------------------------------------------------------------------------------------------------------------------------------------------------------------------------------------------------------------------------------------------------------------------------------------------------------------------------------------------------------------------------------------------------------------------------------------------------------------------------------------------------------------------------------------------------------------------------------------------------------------------------------------------------------------------------------------------------------------------------------------------------------------------------------------------------------------------------------------------------------------------------------------------------------------------------------------------------------------------------------------------------------------------------------------------------------------------------------------------------------------------------------------------------------------------------------------------------------------------------------------------------|
|      | <p> <i>aipim</i>); Frango com batata / inhame / batata baroa / aipim; Pão com margarina; Pão com manteiga; Arroz com feijão; Lasanha / lasanha de frango ou galinha; Lasanha / lasanha de beringela; Salada de legumes e verduras; Salada de tomate; Salada de legumes; Salada de rúcula e tomate seco; Salada de folhas; Salada de alface, tomate e cebola; Salada ou verdura crua, exceto de fruta; Açaí com guaraná e granola; Açaí; Caldo verde; Pirão; Omelete com queijo e presunto; Omelete com legumes; Omelete com carne; Omelete; Galinhada caipira; Galinhada; Galinha com arroz; Farofa de banana; Cuscuz marroquino; Cuscuz de legumes; Cuscuz paulista; Bobo de camara; Arroz à grega ; Charuto de repolho com frango ; Salpicão; Sopa / creme de ervilha; Sopa / caldo de mandioca / mandioquinha / batata baroa / inhame; Sopa de legumes; Sopa de frango com legumes; Sopa de feijão; Sopa / creme de abóbora; Salada de frutas; Sushi; Caldo de feijão; Farofa pronta; Risoto; Mingau (fuba, aveia, farinha, etc); Farofa de couve; Farofa com ovos; Farofa; Batata palha; Batata palito; Milho cozido; Café tipo capuccino; Café tipo expresso; Café com leite; Café; Pipoca doce ou salgada; Pizza de peixe (atum, salmão, sardinha); Pizza de frango com catupiry; Pizza napolitana; Pizza de queijos; Macarronada; Pizza muçarela / mussarela; Panqueca; Salada de maionese; Salada ou verdura cozida, exceto de fruta; Refresco tang; Refresco de limão; Refresco de maracujá; Refresco de laranja; Refresco de caju; Refresco; Vitamina de fruta com leite e cereal; Vitamina mista; Vitamina de morango; Vitamina de abacate; Vitamina de mamão; Vitamina de banana com aveia; Vitamina de banana; Vitamina; Suco de pessego; Suco de morango; Suco de maracujá; Suco de manga; Suco de laranja; Suco de goiaba; Suco de cupuacu; Suco de acerola; Suco de abacaxi; Suco; Esfirra de frango; Polenta; Angu de milho; Coxinha; Óleo de coco; Azeite de oliva; Cerveja; Suco de uva; Suco de tamarindo; Suco de caja/ mangaba/ tapereba e outros regionais; Suco natural, mistura de frutas e vegetais; Suco natural, mistura de frutas; Suco natural de vegetais; Suco natural de fruta; Limonada; Ice tea tradicional; Água; Suco verde; Suco detox; Chá, ervas não especificado; Chá verde, chá branco, chá vermelho; Chá (preto, camomila, erva cidreira, capim limão, etc); Chá diet (preto, camomila, erva cidreira, capim limão, etc); Cevada em pó; Refrigerante não especificado; Chimarrão; Chá mate; Q-suco; Água de coco; Bebida refrigerante, tipo h2o; Água mineral com gás; Água mineral sem gás; Água mineral; Refrigerante de cola light; Refrigerante de uva tradicional; Refrigerante de limão tradicional; Sprite refrigerante tradicional; Refresco de guaraná natural; Guaraná tradicional; Refrigerante de guaraná tradicional; Refrigerante de laranja tradicional; Fanta laranja tradicional; Coca cola tradicional; Refrigerante de cola tradicional; Mini chicken empanado; Linguiça de frango; Hamburger de frango; Tapioca; Pão caseiro; Pão de batata; Pão para wrap; Crepe; Brioche; Torrada integral; Torrada doce; Torrada de qualquer Pão; Pão não especificado; Pão francês integral; Pão de sal integral; Pão árabe integral; Pão integral; Pão de milho; Pão de forma industrializado de qualquer marca; Bisnaguinha; Pãozinho; Pão careca; Pão de trigo; Pão de sal; Pão de hamburger; Pão francês; Kefir; Leite sem lactose; Queijo não especificado light; Requeijão light; Queijo de Minas light; Queijo mussarela / muçarela light; Iogurte de qualquer sabor light; Leite não especificado pasteurizado; Leite de vaca semidesnatado; Leite de vaca desnatado; Leite de soja em pó; Tofu; Bebida achocolatada; Leite aromatizado; Leite achocolatado; Leite com sabor; Queijo não especificado; Queijo cremoso; Requeijão; Queijo polenguinho; Queijo ralado; Leite de soja com sabor; Queijo ricota; Queijo canastra; Queijo de coalho; Queijo de  </p> |

| Diet    | Food items included (in Portuguese)                                                                                                                                                                                                                                                                                                                                                                                                                                                                                                                                                                                                                                                                                                                                                                                                                                                                                                                                                                                                                                                                                                                                                                                                                                                                                                                                                                                                                                                                                                                                                                                                                                                                                                                                                                                                                                                                                                                                                                                                                                                                                                                                                                                                                                                                                                                                                                                                                                                                                                                                                                                                                                                                                                                                                                                                                                                                                                                                                                                                                                                                                                                                                                                                                                                                                                                                                                           |
|---------|---------------------------------------------------------------------------------------------------------------------------------------------------------------------------------------------------------------------------------------------------------------------------------------------------------------------------------------------------------------------------------------------------------------------------------------------------------------------------------------------------------------------------------------------------------------------------------------------------------------------------------------------------------------------------------------------------------------------------------------------------------------------------------------------------------------------------------------------------------------------------------------------------------------------------------------------------------------------------------------------------------------------------------------------------------------------------------------------------------------------------------------------------------------------------------------------------------------------------------------------------------------------------------------------------------------------------------------------------------------------------------------------------------------------------------------------------------------------------------------------------------------------------------------------------------------------------------------------------------------------------------------------------------------------------------------------------------------------------------------------------------------------------------------------------------------------------------------------------------------------------------------------------------------------------------------------------------------------------------------------------------------------------------------------------------------------------------------------------------------------------------------------------------------------------------------------------------------------------------------------------------------------------------------------------------------------------------------------------------------------------------------------------------------------------------------------------------------------------------------------------------------------------------------------------------------------------------------------------------------------------------------------------------------------------------------------------------------------------------------------------------------------------------------------------------------------------------------------------------------------------------------------------------------------------------------------------------------------------------------------------------------------------------------------------------------------------------------------------------------------------------------------------------------------------------------------------------------------------------------------------------------------------------------------------------------------------------------------------------------------------------------------------------------|
|         | <p>minas; Mussarela / mucarela; Queijo muzarella; Queijo colonial; Queijo prato; Manteiga com ou sem sal; Coalhada; Leite fermentado; Bebida lactea; Yakult de qualquer sabor; Iogurte natural; Iogurte desnatado; Iogurte de qualquer sabor; Creme de leite; Leite em po; Leite em po integral; Leite de vaca fresco; Leite de vaca integral; Frango a passarinho; Ovos mexidos; Peito de peru light; Ovo de codorna; Ovo de galinha; Steak de frango; Nuggets de frango; Chester; Peito de peru; Peru em pedaco não especificado; Canja; Fígado de galinha ou frango; Coracao de frango; Moela de galinha ou frango; Drumete de galinha ou frango; Asa de galinha ou frango; Sobrecoxa / coxa de frango / galinha; File de frango; Peito de galinha ou frango; Frango desfiado; Carne de galinha; Galinha em pedacos; Frango em pedacos; Parte de galinha ou frango não especificada; Salmao em conserva; Nabo em conserva; Picles; Atum em conserva; Sardinha em conserva; Milho verde em conserva; Petit pois; Azeitona; Peixe não especificado (em posta, em file, etc); Peixe de agua doce salgado (em posta, em file, etc); Peixe de agua doce (em posta, em file, etc); Steak de peixe ; File de peixe; Sashimi; Ceviche de peixe; Bacalhau; Peixe salgado (em posta, em file, etc); Peixe do mar (em posta, em file, etc); Vinagrete; Gergelim; Creme de queijo; Leite de coco; Toddynho diet; Açúcar; Pamonha; Beiju; Amendoim apimentado; Cuscuz; Fruta seca ou desidratada; Melado; Toddynho; Rapadura; Damasco; Lichia; Abricó; Kiwi; Acerola; Pitanga; Pequii; Sapoti; Morango; Jabuticaba / jaboticaba; Cajá manga; Cereja; Ameixa; Goiaba; Jaca; Uva passa; Uva; Pinha (fruta de conde); Fruta de conde; Pêssego; Pêra; Melão; Melancia; Manga; Papaia ; Mamão; Maçã; Caqui; Abacate; Abacaxi; Mexerica; Tangerina; Limão (comum, galego, etc); Laranja (pêra, seleta, lima, da terra, etc); Banana (ouro, prata, d'água, etc); Banana da terra; Vegetais não especificados; Vegetais folhosos não especificados; Aspargos fresco; Alho; Cebola; Ervilha em vagem; Berinjela / beringela; Vagem; Tomate; Quiabo; Pimenta malagueta; Pimentão; Palmito in natura; Maxixe; Jiló; Chuchu; Pepino; Abóbora; Abobrinha; Rúcula; Brócolis; Acelga; Agrião; Repolho verde; Repolho roxo; Repolho; Mostarda (verdura); Couve flor; Couve; Chicória; Alface; Tahini, pasta; Castanhas e sementes, mistura; Castanhas não especificadas ; Coco não especificado ; Noz ; Licuri ; Castanha de Caju; Castanaha do Brasil ; Castanha do Pará ; Amêndoa ; Coco verde ; Coco seco ; Massa/macarrão integral; Salada de macarrão; Macarrão com peixe ; Proteína de soja; Macarrão instantâneo; Miojo; Granola; Purê de abóbora / jerimum / gerimum; Purê de batata; Macarrão; Fibra de soja; Farinha lactea; Tapioca de goma ; Farinha de tapioca ; Cereal matinal de milho em flocos; Sucrilhos de milho; Mingau de maizena; Mingau de milho; Aveia em flocos; Farinha de aveia; Mingau de arroz; Mucilon; Gengibre; Nabo; Cenoura; Beterraba; Batata (não especificada); Mandioca; Inhame; Batata doce; Batata inglesa; Chia ; Feijão (preto, mulatinho, roxo, rosinha, etc); Lentilha; Grão de bico; Andu; Linhaça ; Feijão verde; Feijão de corda; Ervilha em grão; Amendoim (em gão) (in natura) ; Arroz 7 grãos; Arroz integral; Arroz branco; Arroz (polido, parboilizado, agulha, agulhinha, etc)</p> |
| No beef | <p>Torta de presunto e queijo; Torta de peixe / atum / sardinha; Torta de camarao / frutos do mar; Torta de frango ou galinha; Feijão com bacon; Strogonoff / estrogonofe de frango ou galinha; Strogonoff / estrogonofe de carne de soja; Macarrão cremoso/sugo/tomate; Macarrão com molho branco; Macarrão com legumes ; Macarrão com frango ou galinha ; Macarão ao alho e óleo; Macarrão com queijo; Macarrão com camarão; Salada de legumes, verduras e frutas; Cuscuz de arroz; Temaki; Refogadinho de legumes; Quiche de peixes (salmao, atum, sardinha etc); Peixe ao</p>                                                                                                                                                                                                                                                                                                                                                                                                                                                                                                                                                                                                                                                                                                                                                                                                                                                                                                                                                                                                                                                                                                                                                                                                                                                                                                                                                                                                                                                                                                                                                                                                                                                                                                                                                                                                                                                                                                                                                                                                                                                                                                                                                                                                                                                                                                                                                                                                                                                                                                                                                                                                                                                                                                                                                                                                                             |

| Diet | Food items included (in Portuguese)                                                                                                                                                                                                                                                                                                                                                                                                                                                                                                                                                                                                                                                                                                                                                                                                                                                                                                                                                                                                                                                                                                                                                                                                                                                                                                                                                                                                                                                                                                                                                                                                                                                                                                                                                                                                                                                                                                                                                                                                                                                                                                                                                                                                                                                                                                                                                                                                                                                                                                                                                                                                                                                                                                                                                                                                                                                                                                                                                                                                                                                                                                                                                                                                                                                                                                                                                                                                                                                                                                                                                                                                                                                                                                                                                                                                                                                                                                                                                                                       |
|------|---------------------------------------------------------------------------------------------------------------------------------------------------------------------------------------------------------------------------------------------------------------------------------------------------------------------------------------------------------------------------------------------------------------------------------------------------------------------------------------------------------------------------------------------------------------------------------------------------------------------------------------------------------------------------------------------------------------------------------------------------------------------------------------------------------------------------------------------------------------------------------------------------------------------------------------------------------------------------------------------------------------------------------------------------------------------------------------------------------------------------------------------------------------------------------------------------------------------------------------------------------------------------------------------------------------------------------------------------------------------------------------------------------------------------------------------------------------------------------------------------------------------------------------------------------------------------------------------------------------------------------------------------------------------------------------------------------------------------------------------------------------------------------------------------------------------------------------------------------------------------------------------------------------------------------------------------------------------------------------------------------------------------------------------------------------------------------------------------------------------------------------------------------------------------------------------------------------------------------------------------------------------------------------------------------------------------------------------------------------------------------------------------------------------------------------------------------------------------------------------------------------------------------------------------------------------------------------------------------------------------------------------------------------------------------------------------------------------------------------------------------------------------------------------------------------------------------------------------------------------------------------------------------------------------------------------------------------------------------------------------------------------------------------------------------------------------------------------------------------------------------------------------------------------------------------------------------------------------------------------------------------------------------------------------------------------------------------------------------------------------------------------------------------------------------------------------------------------------------------------------------------------------------------------------------------------------------------------------------------------------------------------------------------------------------------------------------------------------------------------------------------------------------------------------------------------------------------------------------------------------------------------------------------------------------------------------------------------------------------------------------------------------|
|      | <p> <i>leite de coco; Peixe ensopado com batatas; Peixe assado com legumes e batatas; Legumes gratinados; Fricasse de frango ou galinha; Frango ou galinha ao molho pardo / galinha de cabidela; Frango ou galinha com pequi; Frango ensopado; Frango caipira; Carne de porco com legumes; Camarao com molho branco; Caldo de pinto; Bolinho de arroz; Bolinha de queijo; Bife de frango ou galinha a parmegiana; Batata, cenoura e chuchu; Batata com molho branco e queijo; Arroz com frango / arroz com capote; Arroz de brócolis / couve; Arroz com macarrão / aletria / alitria / cabelo de anjo; Arroz com lentilha; Arroz com legumes; Arroz com frango e pequi; Arroz chop suey; Arroz de leite; Arroz carreteiro/arroz tropeiro ; Frango com legumes (exceto batata, inhame e aipim); Frango com batata / inhame / batata baroa / aipim; Pão com margarina; Pão com manteiga; Arroz com feijão; Lasanha / lasanha de frango ou galinha; Lasanha / lasanha de beringela; Salada de legumes e verduras; Salada de tomate; Salada de legumes; Salada de rúcula e tomate seco; Salada de folhas; Salada de alface, tomate e cebola; Salada ou verdura crua, exceto de fruta; Açaí com guaraná e granola; Açaí; Caldo verde; Tutu; Pirão; Omelete com queijo e presunto; Omelete com legumes; Omelete com carne; Omelete; Galinhada caipira; Galinhada; Galinha com arroz; Farofa de banana; Cuscuz marroquino; Cuscuz de legumes; Cuscuz paulista; Bobo de camarao; Arroz à grega ; Charuto de repolho com frango ; Salpicão; Sopa / creme de ervilha; Sopa / caldo de mandioca / mandioquinha / batata baroa / inhame; Sopa de legumes; Sopa de frango com legumes; Sopa de feijao; Sopa / creme de abobora; Salada de frutas; Sushi; Caldo de feijao; Farofa pronta; Risoto; Mingau (fuba, aveia, farinha, etc); Farofa de couve; Farofa com ovos; Farofa; Batata palha; Batata palito; Milho cozido; Cafe tipo capuccino; Cafe tipo expresso; Cafe com leite; Cafe; Pipoca doce ou salgada; Pizza de peixe (atum, salmao, sardinha); Pizza de frango com catupiry; Pizza napolitana; Pizza de queijos; Macarronada; Pizza portuguesa; Pizza presunto; Pizza mucarela / mussarela; Pizza calabreza; Panqueca; Salada de maionese; Salada ou verdura cozida, exceto de fruta; Refresco tang; Refresco de limao; Refresco de maracuja; Refresco de laranja; Refresco de caju; Refresco; Vitamina de fruta com leite e cereal; Vitamina mista; Vitamina de morango; Vitamina de abacate; Vitamina de mamão; Vitamina de banana com aveia; Vitamina de banana; Vitamina; Suco de pessego; Suco de morango; Suco de maracuja; Suco de manga; Suco de laranja; Suco de goiaba; Suco de cupuacu; Suco de acerola; Suco de abacaxi; Suco; Esfirra de frango; Polenta; Angu de milho; Torresmo; Coxinha; Oleo de coco; Azeite de oliva; Cerveja; Suco de uva; Suco de tamarindo; Suco de caja/ mangaba/ tapereba e outros regionais; Suco natural, mistura de frutas e vegetais; Suco natural, mistura de frutas; Suco natural de vegetais; Suco natural de fruta; Limonada; Ice tea tradicional; Agua; Suco verde; Suco detox; Cha, ervas não especificado; Cha verde, cha branco, cha vermelho; Cha (preto, camomila, erva cidreira, capim limao, etc); Cha diet (preto, camomila, erva cidreira, capim limao, etc); Cevada em po; Refrigerante não especificado; Chimarrao; Cha mate; Q-suco; Agua de coco; Bebida refrigerante, tipo h2o; Agua mineral com gas; Agua mineral sem gas; Agua mineral; Refrigerante de cola light; Refrigerante de uva tradicional; Refrigerante de limao tradicional; Sprite refrigerante tradicional; Refresco de guarana natural; Guarana tradicional; Refrigerante de guarana tradicional; Refrigerante de laranja tradicional; Fanta laranja tradicional; Coca cola tradicional; Refrigerante de cola tradicional; Mini chicken empanado; Presunto parma; Presunto; Salaminho; Salame; Mortadela; Linguica de frango; Linguica calabresa; Hamburguer de frango; Bacon; Copa </i> </p> |

| Diet | Food items included (in Portuguese)                                                                                                                                                                                                                                                                                                                                                                                                                                                                                                                                                                                                                                                                                                                                                                                                                                                                                                                                                                                                                                                                                                                                                                                                                                                                                                                                                                                                                                                                                                                                                                                                                                                                                                                                                                                                                                                                                                                                                                                                                                                                                                                                                                                                                                                                                                                                                                                                                                                                                                                                                                                                                                                                                                                                                                                                                                                                                                                                                                                                                                                                                                                                                                                                                                                                                                                                                                                                                                                                                                                                                                                                                                                                                                                                                                                                                                                                                                                                                                                                                     |
|------|---------------------------------------------------------------------------------------------------------------------------------------------------------------------------------------------------------------------------------------------------------------------------------------------------------------------------------------------------------------------------------------------------------------------------------------------------------------------------------------------------------------------------------------------------------------------------------------------------------------------------------------------------------------------------------------------------------------------------------------------------------------------------------------------------------------------------------------------------------------------------------------------------------------------------------------------------------------------------------------------------------------------------------------------------------------------------------------------------------------------------------------------------------------------------------------------------------------------------------------------------------------------------------------------------------------------------------------------------------------------------------------------------------------------------------------------------------------------------------------------------------------------------------------------------------------------------------------------------------------------------------------------------------------------------------------------------------------------------------------------------------------------------------------------------------------------------------------------------------------------------------------------------------------------------------------------------------------------------------------------------------------------------------------------------------------------------------------------------------------------------------------------------------------------------------------------------------------------------------------------------------------------------------------------------------------------------------------------------------------------------------------------------------------------------------------------------------------------------------------------------------------------------------------------------------------------------------------------------------------------------------------------------------------------------------------------------------------------------------------------------------------------------------------------------------------------------------------------------------------------------------------------------------------------------------------------------------------------------------------------------------------------------------------------------------------------------------------------------------------------------------------------------------------------------------------------------------------------------------------------------------------------------------------------------------------------------------------------------------------------------------------------------------------------------------------------------------------------------------------------------------------------------------------------------------------------------------------------------------------------------------------------------------------------------------------------------------------------------------------------------------------------------------------------------------------------------------------------------------------------------------------------------------------------------------------------------------------------------------------------------------------------------------------------------------|
|      | <p>de porco defumada; Carne de charque; Tapioca; Pão caseiro; Pão de batata; Pão para wrap; Crepe; Brioche; Torrada integral; Torrada doce; Torrada de qualquer Pão; Pão não especificado; Pão frances integral; Pão de sal integral; Pão arabe integral; Pão integral; Pão de milho; Pão de forma industrializado de qualquer marca; Bisnaguinha; Pãozinho; Pão careca; Pão de trigo; Pão de sal; Pão de hamburger; Pão francês; Kefir; Leite sem lactose; Queijo não especificado light; Requeijão light; Queijo de minas light; Queijo mussarela / mucarela light; Iogurte de qualquer sabor light; Leite não especificado pasteurizado; Leite de vaca semidesnatado; Leite de vaca desnatado; Leite de soja em po; Tofu; Bebida achocolatada; Leite aromatizado; Leite achocolatado; Leite com sabor; Queijo não especificado; Queijo cremoso; Requeijão; Queijo polenguinho; Queijo ralado; Leite de soja com sabor; Queijo ricota; Queijo canastra; Queijo de coalho; Queijo de minas; Mussarela / mucarela; Queijo muzarella; Queijo colonial; Queijo prato; Manteiga com ou sem sal; Coalhada; Leite fermentado; Bebida lactea; Yakult de qualquer sabor; Iogurte natural; Iogurte desnatado; Iogurte de qualquer sabor; Creme de leite; Leite em po; Leite em po integral; Leite de vaca fresco; Leite de vaca integral; Frango a passarinho; Ovos mexidos; Peito de peru light; Ovo de codorna; Ovo de galinha; Steak de frango; Nuggets de frango; Chester; Peito de peru; Peru em pedaco não especificado; Canja; Figado de galinha ou frango; Coracao de frango; Moela de galinha ou frango; Drumete de galinha ou frango; Asa de galinha ou frango; Sobrecoxa / coxa de frango / galinha; File de frango; Peito de galinha ou frango; Frango desfiado; Carne de galinha; Galinha em pedacos; Frango em pedacos; Parte de galinha ou frango não especificada; Salmao em conserva; Nabo em conserva; Picles; Atum em conserva; Sardinha em conserva; Milho verde em conserva; Petit pois; Azeitona; Peixe não especificado (em posta, em file, etc); Peixe de agua doce salgado (em posta, em file, etc); Peixe de agua doce (em posta, em file, etc); Steak de peixe ; File de peixe; Sashimi; Ceviche de peixe; Bacalhau; Peixe salgado (em posta, em file, etc); Peixe do mar (em posta, em file, etc); Lombo; Sua suina; Pernil (de porco / suino); Carne caprina; Lingua suina / lingua de porco; Carne de porco; Carne suina / carne de porco; Toucinho; Lombo suino / lombo de porco; Costela suina / costela de porco; Bisteca suina / bisteca de porco; Vinagrete; Gergelim; Creme de queijo; Leite de coco; Toddynho diet; Açúcar; Pamonha; Beiju; Amendoim apimentado; Cuscuz; Fruta seca ou desidratada; Melado; Toddynho; Rapadura; Damasco; Lichia; Abricó; Kiwi; Acerola; Pitanga; Pequi; Sapoti; Morango; Jabuticaba / jaboticaba; Cajá manga; Cereja; Ameixa; Goiaba; Jaca; Uva passa; Uva; Pinha (fruta de conde); Fruta de conde; Pêssego; Pêra; Melão; Melancia; Manga; Papaia ; Mamão; Maçã; Caqui; Abacate; Abacaxi; Mexerica; Tangerina; Limão (comum, galego, etc); Laranja (pêra, seleta, lima, da terra, etc); Banana (ouro, prata, d'água, etc); Banana da terra; Vegetais não especificados; Vegetais folhosos não especificados; Aspargos fresco; Alho; Cebola; Ervilha em vagem; Berinjela / beringela; Vagem; Tomate; Quiabo; Pimenta malagueta; Pimentão; Palmito in natura; Maxixe; Jiló; Chuchu; Pepino; Abóbora; Abobrinha; Rúcula; Brócolis; Acelga; Agrião; Repolho verde; Repolho roxo; Repolho; Mostarda (verdura); Couve flor; Couve; Chicória; Alface; Tahini, pasta; Castanhas e sementes, mistura; Castanhas não especificadas ; Coco não especificado ; Noz ; Licuri ; Castanha de Caju; Castanha do Brasil ; Castanha do Pará ; Amêndoa ; Coco verde ; Coco seco ; Massa/macarrão integral; Salada de macarrão; Macarrão com peixe ; Proteína de soja; Macarrão instantâneo; Miojo; Granola; Purê de abóbora / jerimum / gerimum; Purê de batata; Macarrão; Fibra de soja; Farinha lactea;</p> |

| Diet    | Food items included (in Portuguese)                                                                                                                                                                                                                                                                                                                                                                                                                                                                                                                                                                                                                                                                                                                                                                                                                                                                                                                                                                                                                                                                                                                                                                                                                                                                                                                                                                                                                                                                                                                                                                                                                                                                                                                                                                                                                                                                                                                                                                                                                                                                                                                                                                                                                                                                                                                                                                                                                                                                                                                                                                                                                                                                                                                                                                                                                                                                                                                                                                                                                                                                                                                                                                                                                                                                            |
|---------|----------------------------------------------------------------------------------------------------------------------------------------------------------------------------------------------------------------------------------------------------------------------------------------------------------------------------------------------------------------------------------------------------------------------------------------------------------------------------------------------------------------------------------------------------------------------------------------------------------------------------------------------------------------------------------------------------------------------------------------------------------------------------------------------------------------------------------------------------------------------------------------------------------------------------------------------------------------------------------------------------------------------------------------------------------------------------------------------------------------------------------------------------------------------------------------------------------------------------------------------------------------------------------------------------------------------------------------------------------------------------------------------------------------------------------------------------------------------------------------------------------------------------------------------------------------------------------------------------------------------------------------------------------------------------------------------------------------------------------------------------------------------------------------------------------------------------------------------------------------------------------------------------------------------------------------------------------------------------------------------------------------------------------------------------------------------------------------------------------------------------------------------------------------------------------------------------------------------------------------------------------------------------------------------------------------------------------------------------------------------------------------------------------------------------------------------------------------------------------------------------------------------------------------------------------------------------------------------------------------------------------------------------------------------------------------------------------------------------------------------------------------------------------------------------------------------------------------------------------------------------------------------------------------------------------------------------------------------------------------------------------------------------------------------------------------------------------------------------------------------------------------------------------------------------------------------------------------------------------------------------------------------------------------------------------------|
|         | <p><i>Tapioca de goma ; Farinha de tapioca ; Cereal matinal de milho em flocos; Sucrilhos de milho; Mingau de maizena; Mingau de milho; Aveia em flocos; Farinha de aveia; Mingau de arroz; Mucilon; Gengibre; Nabo; Cenoura; Beterraba; Batata (não especificada); Mandioca; Inhame; Batata doce; Batata inglesa; Chia ; Feijão (preto, mulatinho, roxo, rosinha, etc); Lentilha; Grão de bico; Andu; Linhaça ; Feijão verde; Feijão de corda; Ervilha em grão; Amendoim (em grão) (in natura) ; Arroz 7 grãos; Arroz integral; Arroz branco; Arroz (polido, parboilizado, agulha, agulhinha, etc)</i></p>                                                                                                                                                                                                                                                                                                                                                                                                                                                                                                                                                                                                                                                                                                                                                                                                                                                                                                                                                                                                                                                                                                                                                                                                                                                                                                                                                                                                                                                                                                                                                                                                                                                                                                                                                                                                                                                                                                                                                                                                                                                                                                                                                                                                                                                                                                                                                                                                                                                                                                                                                                                                                                                                                                    |
| No pork | <p><i>Torta de peixe / atum / sardinha; Torta de camarão / frutos do mar; Torta de carne; Torta de frango ou galinha; Yakissoba de carne; Strogonoff / estrogonofe de frango ou galinha; Strogonoff / estrogonofe de carne de soja; Strogonoff / estrogonofe de carne; Macarrão cremoso/sugo/tomate; Macarrão com molho branco; Macarrão com legumes ; Macarrão com frango ou galinha ; Macarrão ao alho e óleo; Macarrão com queijo; Macarrão com camarão; Salada de legumes, verduras e frutas; Cuscuz de arroz; Temaki; Refogadinho de legumes; Quiche de peixes (salmao, atum, sardinha etc); Quibe assado / quibe de forno; Picadinho de carne; Peixe ao leite de coco; Peixe ensopado com batatas; Peixe assado com legumes e batatas; Legumes gratinados; Lagarto recheado com linguica; Lagarto recheado com cenoura; Fricasse de frango ou galinha; Frango ou galinha ao molho pardo / galinha de cabidela; Frango ou galinha com pequi; Frango ensopado; Frango caipira; Carne desfiada; Carne assada recheada; Camarão com molho branco; Caldo de pinto; Ensopado de carne com legumes e batata; Carne cozida com legumes e batata; Bolinho de arroz; Bolinha de queijo; Bife de frango ou galinha a parmegiana; Bife a parmegiana; Batata, cenoura e chuchu; Batata com molho branco e queijo; Arroz com frango / arroz com capote; Arroz de brócolis / couve; Arroz com macarrão / aletria / alitria / cabelo de anjo; Arroz com lentilha; Arroz com legumes; Arroz com frango e pequi; Carne de boi com legumes; Arroz de leite; Maria isabel; Arroz carreteiro/arroz tropeiro ; Frango com legumes (exceto batata, inhame e aipim); Frango com batata / inhame / batata baroa / aipim; Carne com legumes (exceto batata, inhame e aipim); Carne com batata, inhame, batata baroa ou aipim; Pão com margarina; Pão com manteiga; Arroz com feijão; Lasanha / lasanha de frango ou galinha; Lasanha / lasanha de beringela; Salada de legumes e verduras; Salada de tomate; Salada de legumes; Salada de rúcula e tomate seco; Salada de folhas; Salada de alface, tomate e cebola; Salada ou verdura crua, exceto de fruta; Costela com aipim / macaxeira / mandioca; Açaí com guaraná e granola; Açaí; Caldo verde; Pirão; Omelete com queijo e presunto; Omelete com legumes; Omelete com carne; Omelete; Galinhada caipira; Galinhada; Galinha com arroz; Farofa de banana; Cuscuz marroquino; Cuscuz de legumes; Cuscuz paulista; Bobo de camarão; Escondidinho de carne; Escondidinho de carne seca; Arroz à grega ; Charuto de repolho com frango ; Salpicão; Sopa / creme de ervilha; Sopa de legumes macarrao e carne; Sopa / caldo de mandioca / mandioquinha / batata baroa / inhame; Sopa de legumes; Sopa de frango com legumes; Sopa de feijao; Sopa / creme de abobora; Sopa (legumes, carne, etc); Salada de frutas; Sushi; Churrasquinho; Churrasco; Baião de dois; Caldo de feijao; Caldo de carne; Farofa pronta; Risoto; Mingau (fuba, aveia, farinha, etc); Farofa de couve; Farofa com ovos; Farofa; Batata palha; Batata palito; Milho cozido; Cafe tipo capuccino; Cafe tipo expresso; Cafe com leite; Cafe; Pipoca doce ou salgada; Costela; Pizza de peixe (atum, salmao, sardinha); Pizza de frango com catupiry; Pizza napolitana; Pizza de queijos; Lasanha;</i></p> |

| Diet | Food items included (in Portuguese)                                                                                                                                                                                                                                                                                                                                                                                                                                                                                                                                                                                                                                                                                                                                                                                                                                                                                                                                                                                                                                                                                                                                                                                                                                                                                                                                                                                                                                                                                                                                                                                                                                                                                                                                                                                                                                                                                                                                                                                                                                                                                                                                                                                                                                                                                                                                                                                                                                                                                                                                                                                                                                                                                                                                                                                                                                                                                                                                                                                                                                                                                                                                                                                                                                                                                                                                                                                                                                                                                                                                                                                                                                                                                                                                                                                                                                                                                                                                                                                                              |
|------|--------------------------------------------------------------------------------------------------------------------------------------------------------------------------------------------------------------------------------------------------------------------------------------------------------------------------------------------------------------------------------------------------------------------------------------------------------------------------------------------------------------------------------------------------------------------------------------------------------------------------------------------------------------------------------------------------------------------------------------------------------------------------------------------------------------------------------------------------------------------------------------------------------------------------------------------------------------------------------------------------------------------------------------------------------------------------------------------------------------------------------------------------------------------------------------------------------------------------------------------------------------------------------------------------------------------------------------------------------------------------------------------------------------------------------------------------------------------------------------------------------------------------------------------------------------------------------------------------------------------------------------------------------------------------------------------------------------------------------------------------------------------------------------------------------------------------------------------------------------------------------------------------------------------------------------------------------------------------------------------------------------------------------------------------------------------------------------------------------------------------------------------------------------------------------------------------------------------------------------------------------------------------------------------------------------------------------------------------------------------------------------------------------------------------------------------------------------------------------------------------------------------------------------------------------------------------------------------------------------------------------------------------------------------------------------------------------------------------------------------------------------------------------------------------------------------------------------------------------------------------------------------------------------------------------------------------------------------------------------------------------------------------------------------------------------------------------------------------------------------------------------------------------------------------------------------------------------------------------------------------------------------------------------------------------------------------------------------------------------------------------------------------------------------------------------------------------------------------------------------------------------------------------------------------------------------------------------------------------------------------------------------------------------------------------------------------------------------------------------------------------------------------------------------------------------------------------------------------------------------------------------------------------------------------------------------------------------------------------------------------------------------------------------------------|
|      | <p>Macarronada; Pizza mucarela / mussarela; Panqueca; Laranja; Salada de maionese; Salada ou verdura cozida, exceto de fruta; Refresco tang; Refresco de limao; Refresco de maracuja; Refresco de laranja; Refresco de caju; Refresco; Vitamina de fruta com leite e cereal; Vitamina mista; Vitamina de morango; Vitamina de abacate; Vitamina de mamão; Vitamina de banana com aveia; Vitamina de banana; Vitamina; Suco de pessego; Suco de morango; Suco de maracuja; Suco de manga; Suco de laranja; Suco de goiaba; Suco de cupuacu; Suco de acerola; Suco de abacaxi; Suco; Esfirra de frango; Esfirra de carne; Polenta; Angu de milho; Pacoca de carne de sol; Quibe; Coxinha; Oleo de coco; Azeite de oliva; Cerveja; Suco de uva; Suco de tamarindo; Suco de caja/ mangaba/ tapereba e outros regionais; Suco natural, mistura de frutas e vegetais; Suco natural, mistura de frutas; Suco natural de vegetais; Suco natural de fruta; Limonada; Ice tea tradicional; Agua; Suco verde; Suco detox; Cha, ervas não especificado; Cha verde, cha branco, cha vermelho; Cha (preto, camomila, erva cidreira, capim limao, etc); Cha diet (preto, camomila, erva cidreira, capim limao, etc); Cevada em po; Refrigerante não especificado; Chimarrao; Cha mate; Q-suco; Agua de coco; Bebida refrigerante, tipo h2o; Agua mineral com gas; Agua mineral sem gas; Agua mineral; Refrigerante de cola light; Refrigerante de uva tradicional; Refrigerante de limao tradicional; Sprite refrigerante tradicional; Refresco de guarana natural; Guarana tradicional; Refrigerante de guarana tradicional; Refrigerante de laranja tradicional; Fanta laranja tradicional; Coca cola tradicional; Refrigerante de cola tradicional; Mini chicken empanado; Hamburger não especificado; Linguiça de frango; Hamburger de frango; Hamburger de carne bovina; Carne de sol; Jaba; Tapioca; Pão caseiro; Pão de batata; Pão para wrap; Crepe; Brioche; Torrada integral; Torrada doce; Torrada de qualquer Pão; Pão não especificado; Pão frances integral; Pão de sal integral; Pão arabe integral; Pão integral; Pão de milho; Pão de forma industrializado de qualquer marca; Bisnaguinha; Pãozinho; Pão careca; Pão de trigo; Pão de sal; Pão de hamburger; Pão francês; Kefir; Leite sem lactose; Queijo não especificado light; Requeijao light; Queijo de minas light; Queijo mussarela / mucarela light; Iogurte de qualquer sabor light; Leite não especificado pasteurizado; Leite de vaca semidesnatado; Leite de vaca desnatado; Leite de soja em po; Tofu; Bebida achocolatada; Leite aromatizado; Leite achocolatado; Leite com sabor; Queijo não especificado; Queijo cremoso; Requeijao; Queijo polenguinho; Queijo ralado; Leite de soja com sabor; Queijo ricota; Queijo canastra; Queijo de coalho; Queijo de minas; Mussarela / mucarela; Queijo muzarella; Queijo colonial; Queijo prato; Manteiga com ou sem sal; Coalhada; Leite fermentado; Bebida lactea; Yakult de qualquer sabor; Iogurte natural; Iogurte desnatado; Iogurte de qualquer sabor; Creme de leite; Leite em po; Leite em po integral; Leite de vaca fresco; Leite de vaca integral; Frango a passarinho; Ovos mexidos; Peito de peru light; Ovo de codorna; Ovo de galinha; Steak de frango; Nuggets de frango; Chester; Peito de peru; Peru em pedaco não especificado; Canja; Fígado de galinha ou frango; Coracao de frango; Moela de galinha ou frango; Drumete de galinha ou frango; Asa de galinha ou frango; Sobrecoxa / coxa de frango / galinha; File de frango; Peito de galinha ou frango; Frango desfiado; Carne de galinha; Galinha em pedacos; Frango em pedacos; Parte de galinha ou frango não especificada; Salmao em conserva; Stroganoff / estrogonofe; Nabo em conserva; Picles; Atum em conserva; Sardinha em conserva; Almondega; Milho verde em conserva; Petit pois; Azeitona; Peixe não especificado (em posta, em file, etc); Peixe de agua doce salgado (em posta, em file, etc); Peixe de agua doce (em posta, em file,</p> |



| Diet       | Food items included (in Portuguese)                                                                                                                                                                                                                                                                                                                                                                                                                                                                                                                                                                                                                                                                                                                                                                                                                                                                                                                                                                                                                                                                                                                                                                                                                                                                                                                                                                                                                                                                                                                                                                                                                                                                                                                                                                                                                                                                                                                                                                                                                                                                                                                                                                                                                                                                                                                                                                                                                                                                                                                                                                                                                                                 |
|------------|-------------------------------------------------------------------------------------------------------------------------------------------------------------------------------------------------------------------------------------------------------------------------------------------------------------------------------------------------------------------------------------------------------------------------------------------------------------------------------------------------------------------------------------------------------------------------------------------------------------------------------------------------------------------------------------------------------------------------------------------------------------------------------------------------------------------------------------------------------------------------------------------------------------------------------------------------------------------------------------------------------------------------------------------------------------------------------------------------------------------------------------------------------------------------------------------------------------------------------------------------------------------------------------------------------------------------------------------------------------------------------------------------------------------------------------------------------------------------------------------------------------------------------------------------------------------------------------------------------------------------------------------------------------------------------------------------------------------------------------------------------------------------------------------------------------------------------------------------------------------------------------------------------------------------------------------------------------------------------------------------------------------------------------------------------------------------------------------------------------------------------------------------------------------------------------------------------------------------------------------------------------------------------------------------------------------------------------------------------------------------------------------------------------------------------------------------------------------------------------------------------------------------------------------------------------------------------------------------------------------------------------------------------------------------------------|
|            | <p><i>etc); Steak de peixe ; File de peixe; Sashimi; Ceviche de peixe; Bacalhau; Peixe salgado (em posta, em file, etc); Peixe do mar (em posta, em file, etc); Carne de panela; Bife de panela; Bife a role; Bife a milanesa; Carne bovina; Bife; Chuleta; Bucho / dobradinha ensopado(a); Carne caprina; Carne moida; Mocoto bovino; Rabada bovina; Lingua bovina; Fígado bovino (bife); Fígado bovino; Dobradinha fresca; Costela bovina; Carne marica bovina; Chamaril; Musculo bovino; Tatu (lagarto redondo); Picanha; Alcatra; Bisteca bovina; Contrafile; File mignon; Vinagrete; Gergelim; Creme de queijo; Leite de coco; Toddyinho diet; Açúcar; Pamonha; Beijú; Amendoim apimentado; Cuscuz; Fruta seca ou desidratada; Melado; Toddyinho; Rapadura; Damasco; Lichia; Abriçó; Kiwi; Acerola; Pitanga; Pequi; Sapoti; Morango; Jabuticaba / jaboticaba; Cajá manga; Cereja; Ameixa; Goiaba; Jaca; Uva passa; Uva; Pinha (fruta de conde); Fruta de conde; Pêssego; Pêra; Melão; Melancia; Manga; Papaia ; Mamão; Maçã; Caqui; Abacate; Abacaxi; Mexerica; Tangerina; Limão (comum, galego, etc); Laranja (pêra, seleta, lima, da terra, etc); Banana (ouro, prata, d'água, etc); Banana da terra; Vegetais não especificados; Vegetais folhosos não especificados; Aspargos fresco; Alho; Cebola; Ervilha em vagem; Berinjela / beringela; Vagem; Tomate; Quiabo; Pimenta malagueta; Pimentão; Palmito in natura; Maxixe; Jiló; Chuchu; Pepino; Abóbora; Abobrinha; Rúcula; Brócolis; Acelga; Agrião; Repolho verde; Repolho roxo; Repolho; Mostarda (verdura); Couve flor; Couve; Chicória; Alface; Tahini, pasta; Castanhas e sementes, mistura; Castanhas não especificadas ; Coco não especificado ; Noz ; Licuri ; Castanha de Caju; Castanaha do Brasil ; Castanha do Pará ; Amêndoa ; Coco verde ; Coco seco ; Massa/macarrão integral; Salada de macarrão; Macarrão com peixe ; Macarrão com carne ; Proteína de soja; Macarrão instantâneo; Miojo; Granola; Purê de abóbora / jerimum / gerimum; Purê de batata; Macarrão; Fibra de soja; Farinha lactea; Tapioca de goma ; Farinha de tapioca ; Cereal matinal de milho em flocos; Sucrilhos de milho; Mingau de maizena; Mingau de milho; Aveia em flocos; Farinha de aveia; Mingau de arroz; Mucilon; Gengibre; Nabo; Cenoura; Beterraba; Batata (não especificada); Mandioca; Inhame; Batata doce; Batata inglesa; Chia ; Feijão (preto, mulatinho, roxo, rosinha, etc); Lentilha; Grão de bico; Andu; Linhaça ; Feijão verde; Feijão de corda; Ervilha em grão; Amendoim (em grão) (in natura) ; Arroz 7 grãos; Arroz integral; Arroz branco; Arroz (polido, parboilizado, agulha, agulhinha, etc)</i></p> |
| Omnivorous | <p><i>Torta de presunto e queijo; Torta de peixe / atum / sardinha; Torta de camarão / frutos do mar; Torta de carne; Torta de frango ou galinha; Feijão com linguiça; Feijão com bacon; Yakissoba de carne; Strogonoff / estrogonofe de frango ou galinha; Strogonoff / estrogonofe de carne de soja; Strogonoff / estrogonofe de carne; Macarrão com salsicha ; Macarrão cremoso/sugo/tomate; Macarrão com molho branco; Macarrão com linguiça; Macarrão com legumes ; Macarrão com frango ou galinha ; Macarão ao alho e óleo; Macarrão com queijo; Macarrão com camarão; Salada de legumes, verduras e frutas; Cuscuz de arroz; Temaki; Refogadinho de legumes; Quiche de peixes (salmao, atum, sardinha etc); Quibe assado / quibe de forno; Picadinho de carne; Peixe ao leite de coco; Peixe ensopado com batatas; Peixe assado com legumes e batatas; Legumes gratinados; Lagarto recheado com linguiça; Lagarto recheado com cenoura; Fricasse de frango ou galinha; Frango ou galinha ao molho pardo / galinha de cabidela; Frango ou galinha com pequi; Frango ensopado; Frango caipira; Jardineira de legumes; Dobradinha com feijão branco; Carne desfiada; Carne de porco com legumes; Carne assada recheada; Camarao com molho branco;</i></p>                                                                                                                                                                                                                                                                                                                                                                                                                                                                                                                                                                                                                                                                                                                                                                                                                                                                                                                                                                                                                                                                                                                                                                                                                                                                                                                                                                                                                       |

| Diet | Food items included (in Portuguese)                                                                                                                                                                                                                                                                                                                                                                                                                                                                                                                                                                                                                                                                                                                                                                                                                                                                                                                                                                                                                                                                                                                                                                                                                                                                                                                                                                                                                                                                                                                                                                                                                                                                                                                                                                                                                                                                                                                                                                                                                                                                                                                                                                                                                                                                                                                                                                                                                                                                                                                                                                                                                                                                                                                                                                                                                                                                                                                                                                                                                                                                                                                                                                                                                                                                                                                                                                                                                                                                                                                                                                                                                                                                                                                                                                                                                                                                                                                                                                                           |
|------|-------------------------------------------------------------------------------------------------------------------------------------------------------------------------------------------------------------------------------------------------------------------------------------------------------------------------------------------------------------------------------------------------------------------------------------------------------------------------------------------------------------------------------------------------------------------------------------------------------------------------------------------------------------------------------------------------------------------------------------------------------------------------------------------------------------------------------------------------------------------------------------------------------------------------------------------------------------------------------------------------------------------------------------------------------------------------------------------------------------------------------------------------------------------------------------------------------------------------------------------------------------------------------------------------------------------------------------------------------------------------------------------------------------------------------------------------------------------------------------------------------------------------------------------------------------------------------------------------------------------------------------------------------------------------------------------------------------------------------------------------------------------------------------------------------------------------------------------------------------------------------------------------------------------------------------------------------------------------------------------------------------------------------------------------------------------------------------------------------------------------------------------------------------------------------------------------------------------------------------------------------------------------------------------------------------------------------------------------------------------------------------------------------------------------------------------------------------------------------------------------------------------------------------------------------------------------------------------------------------------------------------------------------------------------------------------------------------------------------------------------------------------------------------------------------------------------------------------------------------------------------------------------------------------------------------------------------------------------------------------------------------------------------------------------------------------------------------------------------------------------------------------------------------------------------------------------------------------------------------------------------------------------------------------------------------------------------------------------------------------------------------------------------------------------------------------------------------------------------------------------------------------------------------------------------------------------------------------------------------------------------------------------------------------------------------------------------------------------------------------------------------------------------------------------------------------------------------------------------------------------------------------------------------------------------------------------------------------------------------------------------------------------------|
|      | <p>Caldo de pinto; Ensopado de carne com legumes e batata; Carne cozida com legumes e batata; Bolinho de arroz; Bolinha de queijo; Bife de frango ou galinha a parmegiana; Bife a parmegiana; Batata, cenoura e chuchu; Batata com molho branco e queijo; Arroz com frango / arroz com capote; Arroz de brócolis / couve; Arroz com salsicha / linguiça; Arroz com macarrão / aletria / alitria / cabelo de anjo; Arroz com linguiça; Arroz com lentilha; Arroz com legumes; Arroz com frango e pequi; Arroz chop suey; Carne de boi com legumes; Arroz de leite; Maria isabel; Arroz carreteiro/arroz tropeiro ; Frango com legumes (exceto batata, inhame e aipim); Frango com batata / inhame / batata baroa / aipim; Carne com legumes (exceto batata, inhame e aipim); Carne com batata, inhame, batata baroa ou aipim; Pão com margarina; Pão com manteiga; Arroz com feijão; Lasanha / lasanha de frango ou galinha; Lasanha / lasanha de beringela; Salada de legumes e verduras; Salada de tomate; Salada de legumes; Salada de rúcula e tomate seco; Salada de folhas; Salada de alface, tomate e cebola; Salada ou verdura crua, exceto de fruta; Costela com aipim / macaxeira / mandioca; Açaí com guaraná e granola; Açaí; Caldo verde; Tutu; Quiche; Pirão; Omelete com queijo e presunto; Omelete com legumes; Omelete com carne; Omelete; Galinhada caipira; Galinhada; Galinha com arroz; Feijão tropeiro; Farofa de banana; Cuscuz marroquino; Cuscuz de legumes; Cuscuz paulista; Bobo de camara; Escondidinho de carne; Escondidinho de carne seca; Arroz à grega ; Charuto de repolho com frango ; Salpicão; Sopa / creme de ervilha; Sopa de legumes macarrao e carne; Sopa / caldo de mandioca / mandioquinha / batata baroa / inhame; Sopa de legumes; Sopa de frango com legumes; Sopa de feijao; Sopa / creme de abobora; Sopa (legumes, carne, etc); Salada de frutas; Sushi; Churrasquinho; Churrasco; Baião de dois; Caldo de feijao; Caldo de carne; Farofa pronta; Risoto; Mingau (fuba, aveia, farinha, etc); Farofa de couve; Farofa com ovos; Farofa com carne / linguica/ bacon; Farofa; Batata palha; Batata palito; Milho cozido; Café tipo capuccino; Café tipo expresso; Café com leite; Café; Pipoca doce ou salgada; Costela; Pizza de peixe (atum, salmão, sardinha); Pizza de frango com catupiry; Pizza napolitana; Pizza de queijos; Lasanha; Macarronada; Pizza portuguesa; Pizza presunto; Pizza muçarela / mussarela; Pizza calabreza; Panqueca; Lasanha; Pizza; Salada de maionese; Salada ou verdura cozida, exceto de fruta; Refresco tang; Refresco de limão; Refresco de maracujá; Refresco de laranja; Refresco de caju; Refresco; Vitamina de fruta com leite e cereal; Vitamina mista; Vitamina de morango; Vitamina de abacate; Vitamina de mamão; Vitamina de banana com aveia; Vitamina de banana; Vitamina; Suco de pêssego; Suco de morango; Suco de maracujá; Suco de manga; Suco de laranja; Suco de goiaba; Suco de cupuacu; Suco de acerola; Suco de abacaxi; Suco; Esfirra de frango; Esfirra de carne; Polenta; Angu de milho; Pacoca de carne de sol; Quibe; Torresmo; Coxinha; Oleo de coco; Azeite de oliva; Cerveja; Suco de uva; Suco de tamarindo; Suco de caja/ mangaba/ tapereba e outros regionais; Suco natural, mistura de frutas e vegetais; Suco natural, mistura de frutas; Suco natural de vegetais; Suco natural de fruta; Limonada; Ice tea tradicional; Água; Suco verde; Suco detox; Cha, ervas não especificado; Cha verde, cha branco, cha vermelho; Cha (preto, camomila, erva cidreira, capim limão, etc); Cha diet (preto, camomila, erva cidreira, capim limão, etc); Cevada em pó; Refrigerante não especificado; Chimarrao; Cha mate; Q-suco; Água de coco; Bebida refrigerante, tipo h2o; Água mineral com gás; Água mineral sem gás; Água mineral; Refrigerante de cola light; Refrigerante de uva tradicional; Refrigerante de limão tradicional; Sprite refrigerante tradicional; Refresco de guarana natural; Guarana</p> |

| Diet | Food items included (in Portuguese)                                                                                                                                                                                                                                                                                                                                                                                                                                                                                                                                                                                                                                                                                                                                                                                                                                                                                                                                                                                                                                                                                                                                                                                                                                                                                                                                                                                                                                                                                                                                                                                                                                                                                                                                                                                                                                                                                                                                                                                                                                                                                                                                                                                                                                                                                                                                                                                                                                                                                                                                                                                                                                                                                                                                                                                                                                                                                                                                                                                                                                                                                                                                                                                                                                                                                                                                                                                                                                                                                                                                                                                                                                                                                                                                                                                                                                                                                                                                                                                                 |
|------|-------------------------------------------------------------------------------------------------------------------------------------------------------------------------------------------------------------------------------------------------------------------------------------------------------------------------------------------------------------------------------------------------------------------------------------------------------------------------------------------------------------------------------------------------------------------------------------------------------------------------------------------------------------------------------------------------------------------------------------------------------------------------------------------------------------------------------------------------------------------------------------------------------------------------------------------------------------------------------------------------------------------------------------------------------------------------------------------------------------------------------------------------------------------------------------------------------------------------------------------------------------------------------------------------------------------------------------------------------------------------------------------------------------------------------------------------------------------------------------------------------------------------------------------------------------------------------------------------------------------------------------------------------------------------------------------------------------------------------------------------------------------------------------------------------------------------------------------------------------------------------------------------------------------------------------------------------------------------------------------------------------------------------------------------------------------------------------------------------------------------------------------------------------------------------------------------------------------------------------------------------------------------------------------------------------------------------------------------------------------------------------------------------------------------------------------------------------------------------------------------------------------------------------------------------------------------------------------------------------------------------------------------------------------------------------------------------------------------------------------------------------------------------------------------------------------------------------------------------------------------------------------------------------------------------------------------------------------------------------------------------------------------------------------------------------------------------------------------------------------------------------------------------------------------------------------------------------------------------------------------------------------------------------------------------------------------------------------------------------------------------------------------------------------------------------------------------------------------------------------------------------------------------------------------------------------------------------------------------------------------------------------------------------------------------------------------------------------------------------------------------------------------------------------------------------------------------------------------------------------------------------------------------------------------------------------------------------------------------------------------------------------------------------|
|      | <p>tradicional; Refrigerante de guarana tradicional; Refrigerante de laranja tradicional; Fanta laranja tradicional; Coca cola tradicional; Refrigerante de cola tradicional; Mini chicken empanado; Carne salgada não especificada; Pate (figado, calabres, frango, presunto, etc); Hamburger não especificado; Presunto parma; Presunto; Salaminho; Salame; Mortadela; Linguica de frango; Linguica calabresa; Linguica (suína, bovina, mista, etc); Salsicha; Hamburger de frango; Bacon; Copa de porco defumada; Hamburger de carne bovina; Carne de sol; Jaba; Carne de charque; Tapioca; Pão caseiro; Pão de batata; Pão para wrap; Crepe; Brioche; Tortas salgadas de qualquer sabor; Torrada integral; Torrada doce; Torrada de qualquer Pão; Pão não especificado; Pão frances integral; Pão de sal integral; Pão arabe integral; Pão integral; Pão de milho; Pão de forma industrializado de qualquer marca; Bisnaguinha; Pãozinho; Pão careca; Pão de trigo; Pão de sal; Pão de hamburger; Pão francês; Kefir; Leite sem lactose; Queijo não especificado light; Requeijão light; Queijo de minas light; Queijo mussarela / mucarela light; Iogurte de qualquer sabor light; Leite não especificado pasteurizado; Leite de vaca semidesnatado; Leite de vaca desnatado; Leite de soja em po; Tofu; Bebida achocolatada; Leite aromatizado; Leite achocolatado; Leite com sabor; Queijo não especificado; Queijo cremoso; Requeijão; Queijo polenguinho; Queijo ralado; Leite de soja com sabor; Queijo ricota; Queijo canastra; Queijo de coalho; Queijo de minas; Mussarela / mucarela; Queijo muzarella; Queijo colonial; Queijo prato; Manteiga com ou sem sal; Coalhada; Leite fermentado; Bebida lactea; Yakult de qualquer sabor; Iogurte natural; Iogurte desnatado; Iogurte de qualquer sabor; Creme de leite; Leite em po; Leite em po integral; Leite de vaca fresco; Leite de vaca integral; Frango a passarinho; Ovos mexidos; Peito de peru light; Ovo de codorna; Ovo de galinha; Steak de frango; Nuggets de frango; Chester; Peito de peru; Peru em pedaco não especificado; Canja; Figado de galinha ou frango; Coracao de frango; Moela de galinha ou frango; Drumete de galinha ou frango; Asa de galinha ou frango; Sobrecoxa / coxa de frango / galinha; File de frango; Peito de galinha ou frango; Frango desfiado; Carne de galinha; Galinha em pedacos; Frango em pedacos; Parte de galinha ou frango não especificada; Salmao em conserva; Strogonoff / estrogonofe; Nabo em conserva; Picles; Atum em conserva; Sardinha em conserva; Almondega; Cozido; Feijoada; Yakissoba; Milho verde em conserva; Petit pois; Azeitona; Peixe não especificado (em posta, em file, etc); Peixe de agua doce salgado (em posta, em file, etc); Peixe de agua doce (em posta, em file, etc); Steak de peixe ; File de peixe; Sashimi; Ceviche de peixe; Bacalhau; Peixe salgado (em posta, em file, etc); Peixe do mar (em posta, em file, etc); Lombo; Carne de panela; Bife de panela; Bife a role; Bife a milanesa; Carne bovina; Bife; Chuleta; Sua suína; Bucho / dobradinha ensopado(a); Pernil (de porco / suíno); Carne caprina; Lingua suína / lingua de porco; Carne moida; Carne de porco; Carne suína / carne de porco; Toucinho; Lombo suíno / lombo de porco; Costela suína / costela de porco; Bisteca suína / bisteca de porco; Mocoto bovino; Rabada bovina; Lingua bovina; Figado bovino (bife); Figado bovino; Dobradinha fresca; Costela bovina; Carne marica bovina; Chambaril; Musculo bovino; Tatu (lagarto redondo); Picanha; Alcatra; Bisteca bovina; Contrafile; File mignon; Vinagrete; Gergelim; Creme de queijo; Leite de coco; Toddyinho diet; Açúcar; Pamonha; Beiju; Amendoim apimentado; Cuscuz; Fruta seca ou desidratada; Melado; Toddyinho; Rapadura; Damasco; Lichia; Abriçó; Kiwi; Acerola; Pitanga; Pequi; Sapoti; Morango; Jabuticaba / jaboticaba; Cajá manga; Cereja; Ameixa; Goiaba; Jaca; Uva passa; Uva; Pinha (fruta de conde); Fruta de conde; Pêssego;</p> |

| <b>Diet</b> | <b>Food items included (in Portuguese)</b>                                                                                                                                                                                                                                                                                                                                                                                                                                                                                                                                                                                                                                                                                                                                                                                                                                                                                                                                                                                                                                                                                                                                                                                                                                                                                                                                                                                                                                                                                                                                                                                                                                                                  |
|-------------|-------------------------------------------------------------------------------------------------------------------------------------------------------------------------------------------------------------------------------------------------------------------------------------------------------------------------------------------------------------------------------------------------------------------------------------------------------------------------------------------------------------------------------------------------------------------------------------------------------------------------------------------------------------------------------------------------------------------------------------------------------------------------------------------------------------------------------------------------------------------------------------------------------------------------------------------------------------------------------------------------------------------------------------------------------------------------------------------------------------------------------------------------------------------------------------------------------------------------------------------------------------------------------------------------------------------------------------------------------------------------------------------------------------------------------------------------------------------------------------------------------------------------------------------------------------------------------------------------------------------------------------------------------------------------------------------------------------|
|             | <p><i>Pêra; Melão; Melancia; Manga; Papaia ; Mamão; Maçã; Caqui; Abacate; Abacaxi; Mexerica; Tangerina; Limão (comum, galego, etc); Laranja (pêra, seleta, lima, da terra, etc); Banana (ouro, prata, d'água, etc); Banana da terra; Vegetais não especificados; Vegetais folhosos não especificados; Aspargos fresco; Alho; Cebola; Ervilha em vagem; Berinjela / beringela; Vagem; Tomate; Quiabo; Pimenta malagueta; Pimentão; Palmito in natura; Maxixe; Jiló; Chuchu; Pepino; Abóbora; Abobrinha; Rúcula; Brócolis; Acelga; Agrião; Repolho verde; Repolho roxo; Repolho; Mostarda (verdura); Couve flor; Couve; Chicória; Alface; Tahini, pasta; Castanhas e sementes, mistura; Castanhas não especificadas ; Coco não especificado ; Noz ; Licuri ; Castanha de Caju; Castanha do Brasil ; Castanha do Pará ; Amêndoa ; Coco verde ; Coco seco ; Massa/macarrão integral; Salada de macarrão; Macarrão com peixe ; Macarrão com carne ; Proteína de soja; Macarrão instantâneo; Miojo; Granola; Purê de abóbora / jerimum / gerimum; Purê de batata; Macarrão; Fibras de soja; Farinha lactea; Tapioca de goma ; Farinha de tapioca ; Cereal matinal de milho em flocos; Sucrilhos de milho; Mingau de maizena; Mingau de milho; Aveia em flocos; Farinha de aveia; Mingau de arroz; Mucilon; Gengibre; Nabo; Cenoura; Beterraba; Batata (não especificada); Mandioca; Inhame; Batata doce; Batata inglesa; Chia ; Feijão (preto, mulatinho, roxo, rosinha, etc); Lentilha; Grão de bico; Andu; Linhaça ; Feijão verde; Feijão de corda; Ervilha em grão; Amendoim (em grão) (in natura) ; Arroz 7 grãos; Arroz integral; Arroz branco; Arroz (polido, parboilizado, agulha, agulhinha, etc)</i></p> |

### C. Ecoinvent 3.6 Cutoff U process by item

| <b>Process</b>                                                 | <b>Food item (in Portuguese)</b>                                                                                             | <b>GHG Emissions Intensity (kgCO2e/kg)</b> |
|----------------------------------------------------------------|------------------------------------------------------------------------------------------------------------------------------|--------------------------------------------|
| almond production   almond   Cutoff, U - RoW                   | <i>Castanaha do Brasil ; Castanhas não especificadas ; Castanhas e sementes, mistura; Castanha do Pará ; Noz ; Amêndoa ;</i> | 1.54966                                    |
| apple production   apple   Cutoff, U - RoW                     | <i>Maçã;</i>                                                                                                                 | 0.34617                                    |
| apricot production   apricot   Cutoff, U - RoW                 | <i>Damasco; Fruta seca ou desidratada; Abricó;</i>                                                                           | 0.11691                                    |
| aubergine production, open field   aubergine   Cutoff, U - RoW | <i>Berinjela / beringela;</i>                                                                                                | 0.15746                                    |

| Process                                                            | Food item (in Portuguese)                                                                                                                                                                                                                                                                                                                                                                                                                                                                                                      | GHG Emissions Intensity (kgCO <sub>2</sub> e/kg) |
|--------------------------------------------------------------------|--------------------------------------------------------------------------------------------------------------------------------------------------------------------------------------------------------------------------------------------------------------------------------------------------------------------------------------------------------------------------------------------------------------------------------------------------------------------------------------------------------------------------------|--------------------------------------------------|
| avocado production   avocado   Cutoff, U - GLO                     | <i>Abacate;</i>                                                                                                                                                                                                                                                                                                                                                                                                                                                                                                                | 0.48530                                          |
| banana production   banana   Cutoff, U - RoW                       | <i>Banana da terra; Banana (ouro, prata, d'água, etc);</i>                                                                                                                                                                                                                                                                                                                                                                                                                                                                     | 0.21295                                          |
| barley production   barley grain   Cutoff, U - RoW                 | <i>Cevada em po;</i>                                                                                                                                                                                                                                                                                                                                                                                                                                                                                                           | 0.57884                                          |
| Beer, regular (4-5° alcohol)                                       | <i>Cerveja;</i>                                                                                                                                                                                                                                                                                                                                                                                                                                                                                                                | 0.59784                                          |
| bell pepper production, open field   bell pepper   Cutoff, U - RoW | <i>Jiló; Maxixe; Pimentão; Quiabo;</i>                                                                                                                                                                                                                                                                                                                                                                                                                                                                                         | 1.47492                                          |
| Bolognese-style pasta (spaghetti, tagliatelle...), at plant        | <i>Lasanha; Panqueca; Lasanha / lasanha de beringela; Crepe; Lasanha; Lasanha / lasanha de frango ou galinha; Miojo; Macarrão instantâneo; Macarrão; Macarronada; Macarrão com carne ; Macarrão com peixe ; Macarrão com salsicha ; Macarrão cremoso/sugo/tomate; Macarrão com frango ou galinha ; Massa/macarrão integral; Macarrão com queijo; Macarrão com legumes ; Macarrão com molho branco; Macarrão com camarão; Yakissoba; Yakissoba de carne; Macarão ao alho e óleo; Macarrão com linguiça; Salada de macarrão;</i> | 4.42619                                          |
| Bread, french bread                                                | <i>Pão francês; Pão de sal; Pão com manteiga; Pão de forma industrializado de qualquer marca; Bisnaguinha; Pão com margarina; Torrada de qualquer Pão; Pão não especificado; Pãozinho; Pão careca; Pão de batata; Pão caseiro; Pão de trigo; Pão de hamburquer; Pão de milho; Pão para wrap; Torrada doce; Pão integral; Pão arabe integral; Torrada integral; Pão de sal integral; Pão frances integral; Brioche;</i>                                                                                                         | 0.81702                                          |

| Process                                                                                            | Food item (in Portuguese)                                                                                                                                                                                                                                                                                                                                                                      | GHG Emissions Intensity (kgCO <sub>2</sub> e/kg) |
|----------------------------------------------------------------------------------------------------|------------------------------------------------------------------------------------------------------------------------------------------------------------------------------------------------------------------------------------------------------------------------------------------------------------------------------------------------------------------------------------------------|--------------------------------------------------|
| broccoli production   broccoli   Cutoff, U - GLO                                                   | <i>Brócolis;</i>                                                                                                                                                                                                                                                                                                                                                                               | 0.30803                                          |
| butter production, from cow milk   butter, from cow milk   Cutoff, U - GLO                         | <i>Manteiga com ou sem sal;</i>                                                                                                                                                                                                                                                                                                                                                                | 7.33877                                          |
| butter production, from cow milk   buttermilk, from cow milk   Cutoff, U - GLO                     | <i>Yakult de qualquer sabor; Leite fermentado;</i>                                                                                                                                                                                                                                                                                                                                             | 3.22461                                          |
| butter production, from cream, from cow milk   skimmed milk, from cow milk   Cutoff, U - GLO       | <i>Leite de vaca desnatado; Leite de vaca semidesnatado; Leite sem lactose;</i>                                                                                                                                                                                                                                                                                                                | 0.61253                                          |
| cabbage red production   cabbage red   Cutoff, U - GLO                                             | <i>Repolho roxo;</i>                                                                                                                                                                                                                                                                                                                                                                           | 0.16188                                          |
| cabbage white production   cabbage white   Cutoff, U - RoW                                         | <i>Couve; Repolho; Repolho verde;</i>                                                                                                                                                                                                                                                                                                                                                          | 0.15588                                          |
| carrot production   carrot   Cutoff, U - RoW                                                       | <i>Cenoura;</i>                                                                                                                                                                                                                                                                                                                                                                                | 0.11562                                          |
| cashew production   cashew   Cutoff, U - RoW                                                       | <i>Castanha de Caju;</i>                                                                                                                                                                                                                                                                                                                                                                       | 6.87201                                          |
| cauliflower production   cauliflower   Cutoff, U - GLO                                             | <i>Couve-flor;</i>                                                                                                                                                                                                                                                                                                                                                                             | 0.26601                                          |
| cheese production, soft, from cow milk   cheese, from cow milk, fresh, unripened   Cutoff, U - GLO | <i>Queijo prato; Queijo colonial; Queijo muzzarella; Mussarela / mucarela; Queijo de minas; Queijo de coalho; Queijo canastra; Queijo ricota; Queijo ralado; Requeijao; Queijo cremoso; Queijo não especificado; Queijo mussarela / mucarela light; Queijo de minas light; Requeijao light; Queijo não especificado light; Bolinha de queijo; Torta de presunto e queijo; Creme de queijo;</i> | 10.74076                                         |

| Process                                                                      | Food item (in Portuguese)                                                                                                                                                                                                                                                                                                                                                                                                                                                                                                                                                                                                                                                                                                                                                                                                                                                                                                                                                                | GHG Emissions Intensity (kgCO <sub>2</sub> e/kg) |
|------------------------------------------------------------------------------|------------------------------------------------------------------------------------------------------------------------------------------------------------------------------------------------------------------------------------------------------------------------------------------------------------------------------------------------------------------------------------------------------------------------------------------------------------------------------------------------------------------------------------------------------------------------------------------------------------------------------------------------------------------------------------------------------------------------------------------------------------------------------------------------------------------------------------------------------------------------------------------------------------------------------------------------------------------------------------------|--------------------------------------------------|
| chicken production   chicken for slaughtering, live weight   Cutoff, U - GLO | <i>Parte de galinha ou frango não especificada; Frango em pedacos; Galinha em pedacos; Carne de galinha; Frango desfiado; Peito de galinha ou frango; File de frango; Sobrecoxa / coxa de frango / galinha; Asa de galinha ou frango; Drumete de galinha ou frango; Peito de peru; Chester; Frango a passarinho; Hamburguer de frango; Bife de frango ou galinha a parmegiana; Steak de frango; Galinha com arroz; Galinhada; Galinhada caipira; Frango com batata / inhame / batata baroa / aipim; Frango com legumes (exceto batata, inhame e aipim); Frango caipira; Frango ensopado; Frango ou galinha com pequi; Frango ou galinha ao molho pardo / galinha de cabidela; Fricasse de frango ou galinha; Strogonoff / estrogonofe de frango ou galinha; Caldo de pinto; Linguica de frango; Coracao de frango; Figado de galinha ou frango; Nuggets de frango; Mini chicken empanado; Coxinha; Esfirra de frango; Torta de frango ou galinha; Canja; Sopa de frango com legumes;</i> | 2.09925                                          |
| chickpea production   chickpea   Cutoff, U - RoW                             | <i>Grão de bico;</i>                                                                                                                                                                                                                                                                                                                                                                                                                                                                                                                                                                                                                                                                                                                                                                                                                                                                                                                                                                     | 0.69365                                          |
| chilli production   chilli   Cutoff, U - RoW                                 | <i>Pimenta malagueta;</i>                                                                                                                                                                                                                                                                                                                                                                                                                                                                                                                                                                                                                                                                                                                                                                                                                                                                                                                                                                | 0.13074                                          |
| coconut oil production, crude   coconut oil, crude   Cutoff, U - RoW         | <i>Leite de coco; Oleo de coco;</i>                                                                                                                                                                                                                                                                                                                                                                                                                                                                                                                                                                                                                                                                                                                                                                                                                                                                                                                                                      | 2.13740                                          |
| coconut production, dehusked   coconut, dehusked   Cutoff, U - RoW           | <i>Coco seco ; Coco verde ; Coco não especificado ; Água de coco;</i>                                                                                                                                                                                                                                                                                                                                                                                                                                                                                                                                                                                                                                                                                                                                                                                                                                                                                                                    | 0.67509                                          |

| Process                                                                          | Food item (in Portuguese)                                                                                                                                                                                                                                                                                                                                                                                                                  | GHG Emissions Intensity (kgCO <sub>2</sub> e/kg) |
|----------------------------------------------------------------------------------|--------------------------------------------------------------------------------------------------------------------------------------------------------------------------------------------------------------------------------------------------------------------------------------------------------------------------------------------------------------------------------------------------------------------------------------------|--------------------------------------------------|
| coffee green bean production, arabica   coffee, green bean   Cutoff, U - BR      | <i>Cafe; Cafe tipo expresso;</i>                                                                                                                                                                                                                                                                                                                                                                                                           | 4.98493                                          |
| Cola, with sugar and artificial sweetener   at packaging                         | <i>Refrigerante de cola tradicional; Coca cola tradicional; Refrigerante de guarana tradicional; Refrigerante não especificado; Refrigerante de laranja tradicional; Refrigerante de uva tradicional; Guarana tradicional; Sprite refrigerante tradicional; Refrigerante de limao tradicional; Fanta laranja tradicional; Bebida refrigerante, tipo h2o; Refresco de guarana natural; Ice tea tradicional; Refrigerante de cola light;</i> | 0.28355                                          |
| cucumber production   cucumber   Cutoff, U - GLO                                 | <i>Pepino; Pickles;</i>                                                                                                                                                                                                                                                                                                                                                                                                                    | 2.77015                                          |
| demersal fish to generic market for marine fish   fish, marine   Cutoff, U - GLO | <i>Peixe do mar (em posta, em file, etc); Ceviche de peixe; Sashimi; Peixe salgado (em posta, em file, etc); Bacalhau; Bobo de camarao; Camarao com molho branco; Quiche de peixes (salmao, atum, sardinha etc); Torta de peixe / atum / sardinha;</i>                                                                                                                                                                                     | 1.91201                                          |
| Eggs - Input and Output Data imported from Agribalyse 3.0.1                      | <i>Ovo de galinha; Ovos mexidos; Omelete; Ovo de codorna; Omelete com legumes; Omelete com carne; Omelete com queijo e presunto;</i>                                                                                                                                                                                                                                                                                                       | 0.49520                                          |
| fava bean production, organic   fava bean, organic   Cutoff, U - RoW             | <i>Feijão (preto, mulatinho, roxo, rosinha, etc); Feijão de corda; Feijão verde; Feijoada; Baião de dois; Feijão tropeiro; Tutu; Arroz com feijão; Dobradinha com feijão branco; Feijão com bacon; Feijão com linguiça; Andu; Vagem; Caldo de feijao; Sopa de feijao; Sopa / creme de ervilha;</i>                                                                                                                                         | 0.59704                                          |



| Process                                                               | Food item (in Portuguese)                                                                                                                                                                                                           | GHG Emissions Intensity (kgCO <sub>2</sub> e/kg) |
|-----------------------------------------------------------------------|-------------------------------------------------------------------------------------------------------------------------------------------------------------------------------------------------------------------------------------|--------------------------------------------------|
| fish canning, small fish   fish canning, small fish   Cutoff, U - RoW | <i>Sardinha em conserva; Atum em conserva; Salmao em conserva;</i>                                                                                                                                                                  | 4.89196                                          |
| grape production   grape   Cutoff, U - RoW                            | <i>Uva; Uva passa;</i>                                                                                                                                                                                                              | 0.24830                                          |
| kiwi production   kiwi   Cutoff, U - GLO                              | <i>Kiwi;</i>                                                                                                                                                                                                                        | 0.31426                                          |
| lemon production   lemon   Cutoff, U - RoW                            | <i>Limão (comum, galego, etc);</i>                                                                                                                                                                                                  | 0.25392                                          |
| lettuce361 production   lettuce   Cutoff, U - RoW                     | <i>Alface; Salada de folhas; Salada de rúcula e tomate seco; Chicória; Mostarda (verdura); Agrião; Acelga; Rúcula; Vegetais folhosos não especificados;</i>                                                                         | 0.12170                                          |
| linseed production   linseed   Cutoff, U - RoW                        | <i>Chia ;</i>                                                                                                                                                                                                                       | 0.94250                                          |
| maize grain processing, dry milling   maize flour   Cutoff, U - RoW   | <i>Beiju; Farinha de tapioca ; Tapioca de goma ; Tapioca; Farofa; Farofa com carne / linguica/ bacon; Farofa com ovos; Farofa de couve; Farofa pronta; Farofa de banana; Sucrilhos de milho; Cereal matinal de milho em flocos;</i> | 0.34256                                          |
| maize grain production   maize grain   Cutoff, U (copy) - BR-GO       | <i>Cuscuz; Pamonha; Milho verde em conserva; Angu de milho; Polenta; Pipoca doce ou salgada; Milho cozido; Cuscuz marroquino; Cuscuz paulista; Cuscuz de legumes;</i>                                                               | 0.30593                                          |
| mandarin production   mandarin   Cutoff, U - RoW                      | <i>Tangerina; Mexerica;</i>                                                                                                                                                                                                         | 0.43423                                          |
| mango production   mango   Cutoff, U - BR                             | <i>Manga; Goiaba; Cajá manga; Pequi; Salada de frutas;</i>                                                                                                                                                                          | 0.24533                                          |

| Process                                                                                                 | Food item (in Portuguese)                                                                                                                                                                                                                                                                                                                                                                                                                                                                                                                                                                                                                                                                                                                                                                                                                                                                                                                                                                                                                                                                                                                                                                                                                             | GHG Emissions Intensity (kgCO <sub>2</sub> e/kg) |
|---------------------------------------------------------------------------------------------------------|-------------------------------------------------------------------------------------------------------------------------------------------------------------------------------------------------------------------------------------------------------------------------------------------------------------------------------------------------------------------------------------------------------------------------------------------------------------------------------------------------------------------------------------------------------------------------------------------------------------------------------------------------------------------------------------------------------------------------------------------------------------------------------------------------------------------------------------------------------------------------------------------------------------------------------------------------------------------------------------------------------------------------------------------------------------------------------------------------------------------------------------------------------------------------------------------------------------------------------------------------------|--------------------------------------------------|
| market for cattle for slaughtering, live weight   cattle for slaughtering, live weight   Cutoff, U - BR | <i>File mignon; Contrafile; Bisteca bovina; Alcatra; Picanha; Tatu (lagarto redondo); Musculo bovino; Chambaril; Carne marica bovina; Costela bovina; Rabada bovina; Mocoto bovino; Carne moida; Bife; Carne bovina; Bife a milanese; Bife de panela; Carne de panela; Hamburguer de carne bovina; Costela; Churrasco; Churrasquinho; Bife a parmegiana; Almondega; Strogonoff / estrogonofe; Pacoca de carne de sol; Costela com aipim / macaxeira / mandioca; Carne com batata, inhame, batata baroa ou aipim; Carne com legumes (exceto batata, inhame e aipim); Carne de boi com legumes; Carne cozida com legumes e batata; Ensopado de carne com legumes e batata; Carne assada recheada; Carne desfiada; Lagarto recheado com cenoura; Lagarto recheado com linguica; Picadinho de carne; Quibe assado / quibe de forno; Strogonoff / estrogonofe de carne; Carne de sol; Carne salgada não especificada; Linguica (suina, bovina, mista, etc); Pate (figado, calabres, frango, presunto, etc); Figado bovino; Figado bovino (bife); Lingua bovina; Bucho / dobradinha ensopado(a); Quibe; Esfirra de carne; Tortas salgadas de qualquer sabor; Escondidinho de carne seca; Escondidinho de carne; Torta de carne; Caldo de carne; Cozido;</i> | 24.46539                                         |
| melon production   melon   Cutoff, U - GLO                                                              | <i>Melancia; Melão;</i>                                                                                                                                                                                                                                                                                                                                                                                                                                                                                                                                                                                                                                                                                                                                                                                                                                                                                                                                                                                                                                                                                                                                                                                                                               | 0.18940                                          |

| Process                                                                         | Food item (in Portuguese)                                                                                                                                                                                                                                                                                                                                                                                                                                                                                                                | GHG Emissions Intensity (kgCO <sub>2</sub> e/kg) |
|---------------------------------------------------------------------------------|------------------------------------------------------------------------------------------------------------------------------------------------------------------------------------------------------------------------------------------------------------------------------------------------------------------------------------------------------------------------------------------------------------------------------------------------------------------------------------------------------------------------------------------|--------------------------------------------------|
| milk production, from cow   cow milk   Cutoff, U - RoW                          | <i>Leite de vaca integral; Leite de vaca fresco; Leite em po integral; Leite em po; Leite não especificado pasteurizado; Mucilon; Mingau de arroz; Mingau de milho; Mingau de maizena; Mingau (fuba, aveia, farinha, etc); Vitamina; Vitamina de banana; Vitamina de banana com aveia; Vitamina de mamão; Vitamina de abacate; Vitamina de morango; Vitamina mista; Vitamina de fruta com leite e cereal; Coalhada; Kefir; Café com leite; Café tipo capuccino;</i>                                                                      | 1.41312                                          |
| oat production   oat grain   Cutoff, U - RoW                                    | <i>Farinha de aveia; Aveia em flocos; Granola;</i>                                                                                                                                                                                                                                                                                                                                                                                                                                                                                       | 0.68171                                          |
| olive production   olive   Cutoff, U - RoW                                      | <i>Azeite de oliva; Azeitona;</i>                                                                                                                                                                                                                                                                                                                                                                                                                                                                                                        | 0.52682                                          |
| onion production   onion   Cutoff, U - RoW                                      | <i>Alho;</i>                                                                                                                                                                                                                                                                                                                                                                                                                                                                                                                             | 0.29831                                          |
| Orange juice; industrial production                                             | <i>Refresco tang; Suco; Suco natural de fruta; Suco de laranja; Suco de maracujá; Suco de goiaba; Suco de manga; Suco de uva; Suco de abacaxi; Limonada; Suco de acerola; Suco de morango; Suco natural, mistura de frutas; Suco de pessego; Suco verde; Suco de cupuacu; Suco natural de vegetais; Suco natural, mistura de frutas e vegetais; Suco de tamarindo; Suco detox; Suco de caja/ mangaba/ tapereba e outros regionais; Refresco de caju; Refresco de limão; Refresco de laranja; Refresco; Q-suco; Refresco de maracujá;</i> | 0.27807                                          |
| orange production, processing grade   orange, processing grade   Cutoff, U - BR | <i>Laranja (pêra, seleta, lima, da terra, etc); Jaboticaba / jaboticaba; Pitanga; Acerola;</i>                                                                                                                                                                                                                                                                                                                                                                                                                                           | 0.16618                                          |

| Process                                                          | Food item (in Portuguese)                                                                                                                                                                                                                                                                                                                                                                                                                                                                                                                                  | GHG Emissions Intensity (kgCO <sub>2</sub> e/kg) |
|------------------------------------------------------------------|------------------------------------------------------------------------------------------------------------------------------------------------------------------------------------------------------------------------------------------------------------------------------------------------------------------------------------------------------------------------------------------------------------------------------------------------------------------------------------------------------------------------------------------------------------|--------------------------------------------------|
| palm date production   palm date   Cutoff, U – GLO               | <i>Palmito in natura; Açaí; Açaí com guaraná e granola;</i>                                                                                                                                                                                                                                                                                                                                                                                                                                                                                                | 1.49084                                          |
| palm fruit bunch production   palm fruit bunch   Cutoff, U - RoW | <i>Licuri ;</i>                                                                                                                                                                                                                                                                                                                                                                                                                                                                                                                                            | 0.30372                                          |
| papaya production   papaya   Cutoff, U - GLO                     | <i>Mamão; Papaia ;</i>                                                                                                                                                                                                                                                                                                                                                                                                                                                                                                                                     | 0.19822                                          |
| peach production   peach   Cutoff, U - RoW                       | <i>Caqui; Pêssego; Pinha (fruta de conde); Ameixa; Cereja; Sapoti; Lichia;</i>                                                                                                                                                                                                                                                                                                                                                                                                                                                                             | 0.43360                                          |
| peanut production   peanut   Cutoff, U - RoW                     | <i>Amendoim (em grão) (in natura) ;</i>                                                                                                                                                                                                                                                                                                                                                                                                                                                                                                                    | 1.68629                                          |
| pear production   pear   Cutoff, U - RoW                         | <i>Pêra;</i>                                                                                                                                                                                                                                                                                                                                                                                                                                                                                                                                               | 0.39411                                          |
| pineapple production   pineapple   Cutoff, U - GLO               | <i>Abacaxi;</i>                                                                                                                                                                                                                                                                                                                                                                                                                                                                                                                                            | 0.23732                                          |
| Pizza, salami. Adaptado de Agribalyse 3.0.1.                     | <i>Pizza;</i>                                                                                                                                                                                                                                                                                                                                                                                                                                                                                                                                              | 2.92078                                          |
| potato production   potato   Cutoff, U – RoW                     | <i>Vegetais não especificados; Salada de legumes; Salada de legumes e verduras; Batata, cenoura e chuchu; Jardineira de legumes; Legumes gratinados; Refogadinho de legumes; Salada de legumes, verduras e frutas; Batata doce; Batata inglesa; Batata (não especificada); Purê de batata; Batata palito; Batata palha; Mandioca; Pirão; Inhame; Sopa (legumes, carne, etc); Sopa de legumes; Sopa / caldo de mandioca / mandioquinha / batata baroa / inhame; Sopa de legumes macarrao e carne; Salada de maionese; Batata com molho branco e queijo;</i> | 0.20074                                          |

| Process                                                                                  | Food item (in Portuguese)                                                                                                                                                                                                                                                                                                                                                                                                                                                                          | GHG Emissions Intensity (kgCO <sub>2</sub> e/kg) |
|------------------------------------------------------------------------------------------|----------------------------------------------------------------------------------------------------------------------------------------------------------------------------------------------------------------------------------------------------------------------------------------------------------------------------------------------------------------------------------------------------------------------------------------------------------------------------------------------------|--------------------------------------------------|
| protein pea production   protein pea   Cutoff, U - RoW                                   | <i>Ervilha em grão; Lentilha; Ervilha em vagem; Petit pois;</i>                                                                                                                                                                                                                                                                                                                                                                                                                                    | 0.27475                                          |
| radish production   radish   Cutoff, U - GLO                                             | <i>Nabo em conserva; Nabo;</i>                                                                                                                                                                                                                                                                                                                                                                                                                                                                     | 6.62357                                          |
| rice production, non-basmati   rice, non-basmati   Cutoff, U (copy) - RoW                | <i>Arroz (polido, parboilizado, agulha, agulhinha, etc); Arroz branco; Arroz integral; Arroz 7 grãos; Risoto; Sushi; Charuto de repolho com frango ; Arroz à grega ; Arroz carreteiro/arroz tropeiro ; Maria isabel; Arroz de leite; Arroz chop suey; Arroz com frango e pequi; Arroz com legumes; Arroz com lentilha; Arroz com macarrão / aletria / alitria / cabelo de anjo; Arroz com salsicha / linguiça; Arroz com frango / arroz com capote; Bolinho de arroz; Temaki; Cuscuz de arroz;</i> | 1.74770                                          |
| sesame seed production   sesame seed   Cutoff, U - RoW                                   | <i>Tahini, pasta;</i>                                                                                                                                                                                                                                                                                                                                                                                                                                                                              | 2.56562                                          |
| soybean beverage production   soybean beverage   Cutoff, U - RoW                         | <i>Leite de soja com sabor; Leite de soja em po;</i>                                                                                                                                                                                                                                                                                                                                                                                                                                               | 0.56439                                          |
| strawberry production, open field, macro tunnel   strawberry   Cutoff, U - RoW           | <i>Morango;</i>                                                                                                                                                                                                                                                                                                                                                                                                                                                                                    | 0.36052                                          |
| sugar beet production   sugar beet   Cutoff, U - RoW                                     | <i>Beterraba;</i>                                                                                                                                                                                                                                                                                                                                                                                                                                                                                  | 0.05517                                          |
| sugarcane processing, traditional annexed plant   sugar, from sugarcane   Cutoff, U – BR | <i>Rapadura; Melado; Açúcar;</i>                                                                                                                                                                                                                                                                                                                                                                                                                                                                   | 0.12704                                          |
| swine production   swine for slaughtering, live weight   Cutoff, U – RoW                 | <i>Bisteca suína / bisteca de porco; Costela suína / costela de porco; Carne suína / carne de porco; Carne de porco; Pernil (de porco / suíno); Carne de</i>                                                                                                                                                                                                                                                                                                                                       | 6.19325                                          |

| Process                                                                            | Food item (in Portuguese)                                                                                                                                                                                                                                        | GHG Emissions Intensity (kgCO <sub>2</sub> e/kg) |
|------------------------------------------------------------------------------------|------------------------------------------------------------------------------------------------------------------------------------------------------------------------------------------------------------------------------------------------------------------|--------------------------------------------------|
|                                                                                    | <i>porco com legumes; Linguica calabresa; Salsicha; Mortadela; Presunto; Salame; Salaminho; Lingua suína / lingua de porco; Toucinho; Bacon; Torresmo;</i>                                                                                                       |                                                  |
| tap water production, conventional treatment   tap water   Cutoff, U - BR          | <i>Água mineral; Água mineral sem gas; Água mineral com gas; Água;</i>                                                                                                                                                                                           | 0.00028                                          |
| tea production, dried   tea, dried   Cutoff, U - RoW                               | <i>Cha mate; Chamarrao; Cha diet (preto, camomila, erva cidreira, capim limao, etc); Cha (preto, camomila, erva cidreira, capim limao, etc); Cha verde, cha branco, cha vermelho; Cha, ervas não especificadas;</i>                                              | 1.99784                                          |
| tilapia production, extensive aquaculture, in pond   tilapia   Cutoff, U - GLO     | <i>File de peixe; Peixe de água doce (em posta, em file, etc); Peixe não especificado (em posta, em file, etc); Peixe de água doce salgado (em posta, em file, etc); Peixe assado com legumes e batatas; Peixe ensopado com batatas; Peixe ao leite de coco;</i> | 3.22916                                          |
| tofu production   tofu   Cutoff, U - RoW                                           | <i>Proteína de soja; Tofu; Strogonoff / estrogonofe de carne de soja;</i>                                                                                                                                                                                        | 1.46588                                          |
| tomato production, fresh grade, open field   tomato, fresh grade   Cutoff, U - RoW | <i>Vinagrete; Salada ou verdura crua, exceto de fruta; Salada de alface, tomate e cebola; Salada de tomate; Salada ou verdura cozida, exceto de fruta; Tomate;</i>                                                                                               | 0.17790                                          |
| white asparagus production   white asparagus   Cutoff, U - RoW                     | <i>Aspargos fresco;</i>                                                                                                                                                                                                                                          | 0.34751                                          |
| yogurt production, from cow milk   cream, from cow milk   Cutoff, U - RoW          | <i>Creme de leite; Bebida lactea; logurte de qualquer sabor light;</i>                                                                                                                                                                                           | 2.07390                                          |

| Process                                                                    | Food item (in Portuguese)                                                                                                                                   | GHG Emissions Intensity (kgCO <sub>2</sub> e/kg) |
|----------------------------------------------------------------------------|-------------------------------------------------------------------------------------------------------------------------------------------------------------|--------------------------------------------------|
| yogurt production, from cow milk   yogurt, from cow milk   Cutoff, U - RoW | <i>Farinha lactea; logurte de qualquer sabor; logurte desnatado; logurte natural; Toddynho; Leite achocolatado; Leite aromatizado; Bebida achocolatada;</i> | 1.55821                                          |
| zucchini production   zucchini   Cutoff, U - GLO                           | <i>Purê de abóbora / jerimum / gerimum; Abóbora; Chuchu; Abobrinha; Sopa / creme de abobora;</i>                                                            | 0.13763                                          |

## D. List of processes adapted from Agribalyse 3.0.1 to Ecoinvent 3.6 Cutoff, U

| Process                                                                                         | Food item (in Portuguese)                                                                                                                                                                                                                                                                                                                                                                                                                                                                                                       |
|-------------------------------------------------------------------------------------------------|---------------------------------------------------------------------------------------------------------------------------------------------------------------------------------------------------------------------------------------------------------------------------------------------------------------------------------------------------------------------------------------------------------------------------------------------------------------------------------------------------------------------------------|
| Beer, regular (4-5° alcohol), at plant (AGB 3.0)                                                | <i>Cerveja.</i>                                                                                                                                                                                                                                                                                                                                                                                                                                                                                                                 |
| Bolognese-style pasta (spaghetti, tagliatelle...), at plant                                     | <i>Lasanha; Panqueca; Lasanha / lasanha de beringela; Crepe; Lasanha; Lasanha / lasanha de frango ou galinha; Miojo; Macarrão instantâneo; Macarrão; Macarronada; Macarrão com carne ; Macarrão com peixe ; Macarrão com salsicha ; Macarrão cremoso/sugo/tomate; Macarrão com frango ou galinha ; Massa/macarrão integral; Macarrão com queijo; Macarrão com legumes ; Macarrão com molho branco; Macarrão com camarão; Yakissoba; Yakissoba de carne; Macarrão ao alho e óleo; Macarrão com linguiça; Salada de macarrão.</i> |
| Bread, French bread (baguette or ball), with yeast, at plant                                    | <i>Pão francês; Pão de sal; Pão com manteiga; Pão de forma industrializado de qualquer marca; Bisnaguinha; Pão com margarina; Torrada de qualquer Pão; Pão não especificado; Pãozinho; Pão careca; Pão de batata; Pão caseiro; Pão de trigo; Pão de hamburguer; Pão de milho; Pão para wrap; Torrada doce; Pão integral; Pão arabe integral; Torrada integral; Pão de sal integral; Pão frances integral; Brioche.</i>                                                                                                          |
| Cola, with sugar and artificial sweetener(s), processed in FR   Chilled   PET   at distribution | <i>Refrigerante de cola tradicional; Coca cola tradicional; Refrigerante de guarana tradicional; Refrigerante não especificado; Refrigerante de laranja tradicional; Refrigerante de uva tradicional; Guarana tradicional; Sprite refrigerante tradicional; Refrigerante de limao tradicional; Fanta laranja tradicional; Bebida refrigerante, tipo h2o; Refresco de guarana natural; Ice tea tradicional; Refrigerante de cola light.</i>                                                                                      |
| Egg, conventional, indoor production, cage 2012 rules                                           | <i>Ovo de galinha; Ovos mexidos; Omelete; Ovo de codorna; Omelete com legumes; Omelete com carne; Omelete com queijo e presunto.</i>                                                                                                                                                                                                                                                                                                                                                                                            |



| Process                                                          | Food item (in Portuguese)                                                                                                                                                                                                                                                                                                                                                                                                                                                                                                                |
|------------------------------------------------------------------|------------------------------------------------------------------------------------------------------------------------------------------------------------------------------------------------------------------------------------------------------------------------------------------------------------------------------------------------------------------------------------------------------------------------------------------------------------------------------------------------------------------------------------------|
| Orange juice; industrial production; at plant; NFC; 1L (AGB 3.0) | <i>Refresco tang; Suco; Suco natural de fruta; Suco de laranja; Suco de maracuja; Suco de goiaba; Suco de manga; Suco de uva; Suco de abacaxi; Limonada; Suco de acerola; Suco de morango; Suco natural, mistura de frutas; Suco de pessego; Suco verde; Suco de cupuacu; Suco natural de vegetais; Suco natural, mistura de frutas e vegetais; Suco de tamarindo; Suco detox; Suco de caja/ mangaba/ tapereba e outros regionais; Refresco de caju; Refresco de limao; Refresco de laranja; Refresco; Q-suco; Refresco de maracuja.</i> |
| Pizza, chorizo or salami, at plant                               | <i>Pizza; Pizza calabreza; Pizza de frango com catupiry; Pizza portuguesa; Pizza de queijos; Pizza muçarela / mussarela.</i>                                                                                                                                                                                                                                                                                                                                                                                                             |

## E. List of modified Ecoinvent 3.6 Cutoff processes

### Cereals and vegetables

#### rice production, non-basmati | rice, non-basmati | Cutoff, U – RoW

| Flow       | Original provider                                             | Modified provider                                            | Adaptation                 |
|------------|---------------------------------------------------------------|--------------------------------------------------------------|----------------------------|
| Irrigation | market for<br>irrigation  <br>irrigation   Cutoff,<br>U - GLO | market for<br>irrigation  <br>irrigation   Cutoff,<br>U - BR | Link to a new<br>provider. |

#### fava bean production, organic | fava bean, organic | Cutoff, U – RoW

| Flow                                          | Original provider                                                                                                                | Modified provider                                                                                                  | Adaptation                                                                                                                      |
|-----------------------------------------------|----------------------------------------------------------------------------------------------------------------------------------|--------------------------------------------------------------------------------------------------------------------|---------------------------------------------------------------------------------------------------------------------------------|
| Combine harvesting                            | market for combine<br>harvesting  <br>combine harvesting<br>  Cutoff, U - GLO                                                    | combine harvesting<br>  combine<br>harvesting   Cutoff,<br>U - BR                                                  | Link to a new<br>provider.                                                                                                      |
| Drying of bread<br>grain, seed and<br>legumes | market for drying of<br>bread grain, seed<br>and legumes  <br>drying of bread<br>grain, seed and<br>legumes   Cutoff, U<br>- GLO | drying of bread<br>grain, seed and<br>legumes   drying of<br>bread grain, seed<br>and legumes  <br>Cutoff, U - RoW | Link to a new<br>provider. Energy<br>mix updated<br>(provider market<br>group for<br>electricity, low<br>voltage   electricity, |

| Flow                                | Original provider                                                                                      | Modified provider                                                                                     | Adaptation                                  |
|-------------------------------------|--------------------------------------------------------------------------------------------------------|-------------------------------------------------------------------------------------------------------|---------------------------------------------|
|                                     |                                                                                                        |                                                                                                       | low voltage   Cutoff, U – BR)               |
| Fava bean seed, organic, for sowing | market for fava bean seed, organic, for sowing   fava bean seed, organic, for sowing   Cutoff, U - GLO | fava bean seed production, organic, for sowing   fava bean seed, organic, for sowing   Cutoff, U- RoW | Link to a new provider. Energy mix updated. |

**tofu production | tofu | Cutoff, U - RoW**

| Flow                                       | Original provider                                              | Modified provider                                                                           | Adaptation                       |
|--------------------------------------------|----------------------------------------------------------------|---------------------------------------------------------------------------------------------|----------------------------------|
| Electricity, medium voltage                | Mix from various locations.                                    | market group for electricity, medium voltage   electricity, medium voltage   Cutoff, U - BR | Link to a new provider.          |
| Tap water                                  | Mix from various locations.                                    | market for tap water   tap water   Cutoff, U - BR                                           | Link to a new provider.          |
| Soybean, organic (substituído por soybean) | Market for soybean, organic soybean, organic   Cutoff, U - GLO | soybean production   soybean   Cutoff, U -BR-GO                                             | Link to a new flow and provider. |
| Biowaste                                   | market for biowaste   biowaste   Cutoff, U - CH                | market for biowaste   biowaste   Cutoff, U - RoW                                            | Link to a new provider.          |

| Flow                | Original provider                                                     | Modified provider                                                      | Adaptation              |
|---------------------|-----------------------------------------------------------------------|------------------------------------------------------------------------|-------------------------|
| Wastewater, average | market for wastewater, average   wastewater, average   Cutoff, U - CH | market for wastewater, average   wastewater, average   Cutoff, U - RoW | Link to a new provider. |

**protein pea production | protein pea | Cutoff, U – RoW**

| Flow                                    | Original provider                                                                                              | Modified provider                                                                                   | Adaptation                                                                                                                                   |
|-----------------------------------------|----------------------------------------------------------------------------------------------------------------|-----------------------------------------------------------------------------------------------------|----------------------------------------------------------------------------------------------------------------------------------------------|
| Combine harvesting                      | market for combine harvesting   combine harvesting   Cutoff, U - GLO                                           | combine harvesting   combine harvesting   Cutoff, U - BR                                            | Link to a new provider.                                                                                                                      |
| Drying of bread grain, seed and legumes | market for drying of bread grain, seed and legumes   drying of bread grain, seed and legumes   Cutoff, U - GLO | drying of bread grain, seed and legumes   drying of bread grain, seed and legumes   Cutoff, U - RoW | Link to a new provider. Energy mix updated (Provider: market group for electricity, low voltage   electricity, low voltage   Cutoff, U – BR) |
| Fertilising, by broadcaster             | market for fertilising, by broadcaster   fertilising, by                                                       | fertilising, by broadcaster   fertilising, by broadcaster   Cutoff, U - BR                          | Link to a new provider.                                                                                                                      |

| Flow                 | Original provider                                                           | Modified provider                                             | Adaptation                                                                                                                                   |
|----------------------|-----------------------------------------------------------------------------|---------------------------------------------------------------|----------------------------------------------------------------------------------------------------------------------------------------------|
|                      | broadcaster  <br>Cutoff, U - GLO                                            |                                                               |                                                                                                                                              |
| Pea seed, for sowing | market for pea seed, for sowing  <br>pea seed, for sowing   Cutoff, U - GLO | pea seed, for sowing   pea seed, for sowing   Cutoff, U - RoW | Link to a new provider. Energy mix updated (Provider: market group for electricity, low voltage   electricity, low voltage   Cutoff, U – BR) |

#### chickpea production | chickpea | Cutoff, U – RoW

| Flow                 | Original provider                                                           | Modified provider                                             | Adaptation                                                                                                                                   |
|----------------------|-----------------------------------------------------------------------------|---------------------------------------------------------------|----------------------------------------------------------------------------------------------------------------------------------------------|
| Irrigation           | Mix from various locations.                                                 | market for irrigation  <br>irrigation   Cutoff, U - BR        | Link to a new provider.                                                                                                                      |
| Pea seed, for sowing | market for pea seed, for sowing  <br>pea seed, for sowing   Cutoff, U - GLO | pea seed, for sowing   pea seed, for sowing   Cutoff, U - RoW | Link to a new provider. Energy mix updated (Provider: market group for electricity, low voltage   electricity, low voltage   Cutoff, U – BR) |

## Verduras

lettuce<sup>361</sup> production | lettuce | Cutoff, U – GLO; zucchini production | zucchini | Cutoff, U – GLO; cucumber production | cucumber | Cutoff, U - GLO

| Flow                                   | Original provider                                                                      | Modified provider                                                                     | Adaptation                        |
|----------------------------------------|----------------------------------------------------------------------------------------|---------------------------------------------------------------------------------------|-----------------------------------|
| Electricity, low voltage               | market group for electricity, low voltage   electricity, low voltage   Cutoff, U - GLO | market group for electricity, low voltage   electricity, low voltage   Cutoff, U - BR | Link to a new provider.           |
| Fertilising, by broadcaster            | Market for fertilising, by broadcaster   fertilising, by broadcaster   Cutoff, U - GLO | fertilising, by broadcaster   fertilising, by broadcaster   Cutoff, U - BR            | Link to a new provider.           |
| Irrigation                             | market group for irrigation   irrigation   Cutoff, U - GLO                             | market for irrigation   irrigation   Cutoff, U - BR                                   | Link to a new provider.           |
| Tap water                              | market group for tap water   tap water   Cutoff, U - GLO                               | market for tap water   tap water   Cutoff, U - BR                                     | Link to a new provider.           |
| Transport, freight, lorry, unspecified | -                                                                                      | market group for transport, freight, lorry, unspecified   transport, freight,         | New flow. Data From Conab (2019). |

| Flow | Original provider | Modified provider                       | Adaptation |
|------|-------------------|-----------------------------------------|------------|
|      |                   | lorry, unspecified  <br>Cutoff, U - GLO |            |

cabbage white production | cabbage white | Cutoff, U – RoW; cabbage red production | cabbage red | Cutoff, U – GLO; cauliflower production | cauliflower | Cutoff, U – GLO; broccoli production | broccoli | Cutoff, U – GLO;

| Flow                                   | Original provider                                                                      | Modified provider                                                                     | Adaptation                        |
|----------------------------------------|----------------------------------------------------------------------------------------|---------------------------------------------------------------------------------------|-----------------------------------|
| Electricity, low voltage               | Mix from various locations.                                                            | market group for electricity, low voltage   electricity, low voltage   Cutoff, U - BR | Link to a new provider.           |
| Fertilising, by broadcaster            | Market for fertilising, by broadcaster   fertilising, by broadcaster   Cutoff, U - GLO | fertilising, by broadcaster   fertilising, by broadcaster   Cutoff, U - BR            | Link to a new provider.           |
| Irrigation                             | Mix from various locations.                                                            | market for irrigation   irrigation   Cutoff, U - BR                                   | Link to a new provider.           |
| Transport, freight, lorry, unspecified | -                                                                                      | market group for transport, freight, lorry, unspecified   transport, freight,         | New flow. Data From Conab (2019). |

| Flow | Original provider | Modified provider                       | Adaptation |
|------|-------------------|-----------------------------------------|------------|
|      |                   | lorry, unspecified  <br>Cutoff, U - GLO |            |

**white asparagus production | white asparagus | Cutoff, U – RoW**

| Flow                              | Original provider                                                                                               | Modified provider                                                                                               | Adaptation                                        |
|-----------------------------------|-----------------------------------------------------------------------------------------------------------------|-----------------------------------------------------------------------------------------------------------------|---------------------------------------------------|
| Asparagus seedig,<br>for planting | market for<br>asparagus seedling,<br>for planting  <br>asparagus seedling,<br>for planting  <br>Cutoff, U - GLO | asparagus seedling<br>production, for<br>planting  <br>asparagus seedling,<br>for planting  <br>Cutoff, U - RoW | Link to new<br>provider and energy<br>mix update. |
| Fertilising, by<br>broadcaster    | Market for<br>fertilising, by<br>broadcaster  <br>fertilising, by<br>broadcaster  <br>Cutoff, U - GLO           | fertilising, by<br>broadcaster  <br>fertilising, by<br>broadcaster  <br>Cutoff, U - BR                          | Link to a new<br>provider.                        |
| Irrigation                        | Mix from various<br>locations.                                                                                  | market for<br>irrigation  <br>irrigation   Cutoff,<br>U - BR                                                    | Link to a new<br>provider.                        |

**tomato production, fresh grade, open field | tomato, fresh grade | Cutoff, U – RoW**

| Flow | Original provider | Modified provider | Adaptation |
|------|-------------------|-------------------|------------|
|------|-------------------|-------------------|------------|



|                                        |                                                                                        |                                                                                                                    |                                             |
|----------------------------------------|----------------------------------------------------------------------------------------|--------------------------------------------------------------------------------------------------------------------|---------------------------------------------|
| Fertilising, by broadcaster            | Market for fertilising, by broadcaster   fertilising, by broadcaster   Cutoff, U - GLO | fertilising, by broadcaster   fertilising, by broadcaster   Cutoff, U - BR                                         | Link to a new provider.                     |
| mancozeb                               | market for mancozeb   mancozeb   Cutoff, U - GLO                                       |                                                                                                                    | Link to new provider and energy mix update. |
| Irrigation                             | Mix from various locations.                                                            | market for irrigation   irrigation   Cutoff, U - BR                                                                | Link to a new provider.                     |
| Transport, freight, lorry, unspecified | -                                                                                      | market group for transport, freight, lorry, unspecified   transport, freight, lorry, unspecified   Cutoff, U - GLO | New flow. Data From Conab (2019).           |

#### carrot production | carrot | Cutoff, U – RoW

| Flow                                                      | Original provider                                                                           | Modified provider                                                                                    | Adaptation              |
|-----------------------------------------------------------|---------------------------------------------------------------------------------------------|------------------------------------------------------------------------------------------------------|-------------------------|
| application of plant protection product, by field sprayer | market for application of plant protection product, by field sprayer   application of plant | application of plant protection product, by field sprayer   application of plant protection product, | Link to a new provider. |

|                                           |                                                                                                       |                                                                                                                                   |                                                   |
|-------------------------------------------|-------------------------------------------------------------------------------------------------------|-----------------------------------------------------------------------------------------------------------------------------------|---------------------------------------------------|
|                                           | protection product,<br>by field sprayer  <br>Cutoff, U - GLO                                          | by field sprayer  <br>Cutoff, U - BR                                                                                              |                                                   |
| carrot seed, for<br>sowing                | market for carrot<br>seed, for sowing  <br>carrot seed, for<br>sowing   Cutoff, U -<br>GLO            | carrot seed<br>production, for<br>sowing   carrot<br>seed, for sowing  <br>Cutoff, U - RoW                                        | Link to new<br>provider and energy<br>mix update. |
| Fertilising, by<br>broadcaster            | Market for<br>fertilising, by<br>broadcaster  <br>fertilising, by<br>broadcaster  <br>Cutoff, U - GLO | fertilising, by<br>broadcaster  <br>fertilising, by<br>broadcaster  <br>Cutoff, U - BR                                            | Link to a new<br>provider.                        |
| Irrigation                                | Mix from various<br>locations.                                                                        | market for<br>irrigation  <br>irrigation   Cutoff,<br>U - BR                                                                      | Link to a new<br>provider.                        |
| Transport, freight,<br>lorry, unspecified | -                                                                                                     | market group for<br>transport, freight,<br>lorry, unspecified  <br>transport, freight,<br>lorry, unspecified  <br>Cutoff, U - GLO | New flow. Data<br>From Conab (2019).              |

**bell pepper production, open field | bell pepper | Cutoff, U – RoW**

| Flow | Original provider | Modified provider | Adaptation |
|------|-------------------|-------------------|------------|
|------|-------------------|-------------------|------------|

|                                        |                             |                                                                                                                    |                                   |
|----------------------------------------|-----------------------------|--------------------------------------------------------------------------------------------------------------------|-----------------------------------|
| Irrigation                             | Mix from various locations. | market for irrigation   irrigation   Cutoff, U - BR                                                                | Link to a new provider.           |
| Naphtha                                | Mix from various locations. | market for naphtha   naphtha   Cutoff, U - BR                                                                      | Link to a new provider.           |
| Transport, freight, lorry, unspecified | -                           | market group for transport, freight, lorry, unspecified   transport, freight, lorry, unspecified   Cutoff, U - GLO | New flow. Data From Conab (2019). |

**aubergine production, open field | aubergine | Cutoff, U – RoW**

| Flow                                   | Original provider           | Modified provider                                                                                                  | Adaptation                        |
|----------------------------------------|-----------------------------|--------------------------------------------------------------------------------------------------------------------|-----------------------------------|
| Irrigation                             | Mix from various locations. | market for irrigation   irrigation   Cutoff, U - BR                                                                | Link to a new provider.           |
| Transport, freight, lorry, unspecified | -                           | market group for transport, freight, lorry, unspecified   transport, freight, lorry, unspecified   Cutoff, U - GLO | New flow. Data From Conab (2019). |

**onion production | onion | Cutoff, U – RoW**

| Flow                                   | Original provider                                                                        | Modified provider                                                                                                  | Adaptation                        |
|----------------------------------------|------------------------------------------------------------------------------------------|--------------------------------------------------------------------------------------------------------------------|-----------------------------------|
| Irrigation                             | Mix from various locations.                                                              | market for irrigation   irrigation   Cutoff, U - BR                                                                | Link to a new provider.           |
| Onion seedling, for planting           | market for onion seedling, for planting   onion seedling, for planting   Cutoff, U – GLO | market for onion seedling, for planting   onion seedling, for planting   Cutoff, U – GLO                           | Energy mix update.                |
| Transport, freight, lorry, unspecified | -                                                                                        | market group for transport, freight, lorry, unspecified   transport, freight, lorry, unspecified   Cutoff, U - GLO | New flow. Data From Conab (2019). |

#### radish production | radish | Cutoff, U – GLO

| Flow                        | Original provider                                                                      | Modified provider                                                                     | Adaptation              |
|-----------------------------|----------------------------------------------------------------------------------------|---------------------------------------------------------------------------------------|-------------------------|
| Electricity, low voltage    | market group for electricity, low voltage   electricity, low voltage   Cutoff, U - GLO | market group for electricity, low voltage   electricity, low voltage   Cutoff, U - BR | Link to a new provider. |
| Fertilising, by broadcaster | Market for fertilising, by broadcaster                                                 | fertilising, by broadcaster   fertilising, by                                         | Link to a new provider. |

|            |                                                                     |                                                              |                            |
|------------|---------------------------------------------------------------------|--------------------------------------------------------------|----------------------------|
|            | fertilising, by<br>broadcaster  <br>Cutoff, U - GLO                 | broadcaster  <br>Cutoff, U - BR                              |                            |
| Irrigation | market group for<br>irrigation  <br>irrigation   Cutoff,<br>U - GLO | market for<br>irrigation  <br>irrigation   Cutoff,<br>U - BR | Link to a new<br>provider. |
| Tap water  | market group for<br>tap water   tap<br>water   Cutoff, U -<br>GLO   | market for tap<br>water   tap water  <br>Cutoff, U - BR      | Link to a new<br>provider. |

**chilli production | chilli | Cutoff, U – RoW**

| <b>Flow</b> | <b>Original provider</b>       | <b>Modified provider</b>                                     | <b>Adaptation</b>          |
|-------------|--------------------------------|--------------------------------------------------------------|----------------------------|
| Irrigation  | Mix from various<br>locations. | market for<br>irrigation  <br>irrigation   Cutoff,<br>U - BR | Link to a new<br>provider. |

**palm date production | palm date | Cutoff, U – GLO**

| <b>Flow</b> | <b>Original provider</b> | <b>Modified provider</b> | <b>Adaptation</b> |
|-------------|--------------------------|--------------------------|-------------------|
|-------------|--------------------------|--------------------------|-------------------|

|            |                                                                     |                                                              |                            |
|------------|---------------------------------------------------------------------|--------------------------------------------------------------|----------------------------|
| Irrigation | market group for<br>irrigation  <br>irrigation   Cutoff,<br>U - GLO | market for<br>irrigation  <br>irrigation   Cutoff,<br>U - BR | Link to a new<br>provider. |
|------------|---------------------------------------------------------------------|--------------------------------------------------------------|----------------------------|

## Raízes e tubérculos

### potato production | potato | Cutoff, U – RoW

| Flow                           | Original provider                                                                                     | Modified provider                                                                            | Adaptation                                        |
|--------------------------------|-------------------------------------------------------------------------------------------------------|----------------------------------------------------------------------------------------------|---------------------------------------------------|
| Fertilising, by<br>broadcaster | Market for<br>fertilising, by<br>broadcaster  <br>fertilising, by<br>broadcaster  <br>Cutoff, U - GLO | fertilising, by<br>broadcaster  <br>fertilising, by<br>broadcaster  <br>Cutoff, U - BR       | Link to a new<br>provider.                        |
| Irrigation                     | Mix from various<br>locations.                                                                        | market for<br>irrigation  <br>irrigation   Cutoff,<br>U - BR                                 | Link to a new<br>provider.                        |
| Potato grading                 | potato grading  <br>potato grading  <br>Cutoff, U - RoW                                               | potato grading  <br>potato grading  <br>Cutoff, U - RoW                                      | Energy mix update.                                |
| Potato seed, for<br>setting    | market for potato<br>seed, for setting  <br>potato seed, for<br>setting   Cutoff, U -<br>GLO          | potato seed<br>production, for<br>setting   potato<br>seed, for setting  <br>Cutoff, U - RoW | Link to new<br>provider and energy<br>mix update. |

|                                        |   |                                                                                                                    |                                   |
|----------------------------------------|---|--------------------------------------------------------------------------------------------------------------------|-----------------------------------|
| Transport, freight, lorry, unspecified | - | market group for transport, freight, lorry, unspecified   transport, freight, lorry, unspecified   Cutoff, U - GLO | New flow. Data From Conab (2019). |
|----------------------------------------|---|--------------------------------------------------------------------------------------------------------------------|-----------------------------------|

#### **sugar beet production | sugar beet | Cutoff, U – RoW**

| <b>Flow</b>                            | <b>Original provider</b>                                                               | <b>Modified provider</b>                                                                                           | <b>Adaptation</b>                           |
|----------------------------------------|----------------------------------------------------------------------------------------|--------------------------------------------------------------------------------------------------------------------|---------------------------------------------|
| Fertilising, by broadcaster            | Market for fertilising, by broadcaster   fertilising, by broadcaster   Cutoff, U - GLO | fertilising, by broadcaster   fertilising, by broadcaster   Cutoff, U - BR                                         | Link to a new provider.                     |
| sugar beet seed, for sowing            | market for sugar beet seed, for sowing   sugar beet seed, for sowing   Cutoff, U - GLO | sugar beet seed production, for sowing   sugar beet seed, for sowing   Cutoff, U - GLO                             | Link to new provider and energy mix update. |
| Transport, freight, lorry, unspecified | -                                                                                      | market group for transport, freight, lorry, unspecified   transport, freight, lorry, unspecified   Cutoff, U - GLO | New flow. Data From Conab (2019).           |

#### **Frutas**

**pineapple production | pineapple | Cutoff, U – GLO**

| <b>Flow</b>                            | <b>Original provider</b>                                                               | <b>Modified provider</b>                                                                                           | <b>Adaptation</b>                 |
|----------------------------------------|----------------------------------------------------------------------------------------|--------------------------------------------------------------------------------------------------------------------|-----------------------------------|
| Electricity, low voltage               | market group for electricity, low voltage   electricity, low voltage   Cutoff, U - GLO | market group for electricity, low voltage   electricity, low voltage   Cutoff, U - BR                              | Link to a new provider.           |
| Fertilising, by broadcaster            | Market for fertilising, by broadcaster   fertilising, by broadcaster   Cutoff, U - GLO | fertilising, by broadcaster   fertilising, by broadcaster   Cutoff, U - BR                                         | Link to a new provider.           |
| Irrigation                             | market group for irrigation   irrigation   Cutoff, U - GLO                             | market for irrigation   irrigation   Cutoff, U - BR                                                                | Link to a new provider.           |
| Transport, freight, lorry, unspecified | -                                                                                      | market group for transport, freight, lorry, unspecified   transport, freight, lorry, unspecified   Cutoff, U - GLO | New flow. Data From Conab (2019). |

**banana production | banana | Cutoff, U – RoW**

| <b>Flow</b> | <b>Original provider</b> | <b>Modified provider</b> | <b>Adaptation</b> |
|-------------|--------------------------|--------------------------|-------------------|
|-------------|--------------------------|--------------------------|-------------------|



|                                        |                                                                                        |                                                                                                                    |                                   |
|----------------------------------------|----------------------------------------------------------------------------------------|--------------------------------------------------------------------------------------------------------------------|-----------------------------------|
| Electricity, low voltage               | Mix from various locations.                                                            | market group for electricity, low voltage   electricity, low voltage   Cutoff, U - BR                              | Link to a new provider.           |
| Fertilising, by broadcaster            | Market for fertilising, by broadcaster   fertilising, by broadcaster   Cutoff, U - GLO | fertilising, by broadcaster   fertilising, by broadcaster   Cutoff, U - BR                                         | Link to a new provider.           |
| Irrigation                             | Mix from various locations.                                                            | market for irrigation   irrigation   Cutoff, U - BR                                                                | Link to a new provider.           |
| Naphtha                                | Mix from various locations.                                                            | market for naphtha   naphtha   Cutoff, U - BR                                                                      | Link to a new provider.           |
| Transport, freight, lorry, unspecified | -                                                                                      | market group for transport, freight, lorry, unspecified   transport, freight, lorry, unspecified   Cutoff, U - GLO | New flow. Data From Conab (2019). |

**orange production, processing grade | orange, processing grade | Cutoff, U – BR**

| Flow | Original provider | Modified provider | Adaptation |
|------|-------------------|-------------------|------------|
|------|-------------------|-------------------|------------|

|                                        |   |                                                                                                                    |                                   |
|----------------------------------------|---|--------------------------------------------------------------------------------------------------------------------|-----------------------------------|
| Transport, freight, lorry, unspecified | - | market group for transport, freight, lorry, unspecified   transport, freight, lorry, unspecified   Cutoff, U - GLO | New flow. Data From Conab (2019). |
|----------------------------------------|---|--------------------------------------------------------------------------------------------------------------------|-----------------------------------|

**apple production | apple | Cutoff, U – RoW**

| Flow                                                      | Original provider                                                                                                                                  | Modified provider                                                                                                                      | Adaptation              |
|-----------------------------------------------------------|----------------------------------------------------------------------------------------------------------------------------------------------------|----------------------------------------------------------------------------------------------------------------------------------------|-------------------------|
| Application of plant protection product, by field sprayer | market for application of plant protection product, by field sprayer   application of plant protection product, by field sprayer   Cutoff, U - GLO | application of plant protection product, by field sprayer   application of plant protection product, by field sprayer   Cutoff, U - BR | Link to a new provider. |
| Fertilising, by broadcaster                               | Market for fertilising, by broadcaster   fertilising, by broadcaster   Cutoff, U - GLO                                                             | fertilising, by broadcaster   fertilising, by broadcaster   Cutoff, U - BR                                                             | Link to a new provider. |
| Irrigation                                                | Mix from various locations.                                                                                                                        | market for irrigation   irrigation   Cutoff, U - BR                                                                                    | Link to a new provider. |

|                                        |   |                                                                                                                    |                                   |
|----------------------------------------|---|--------------------------------------------------------------------------------------------------------------------|-----------------------------------|
| Transport, freight, lorry, unspecified | - | market group for transport, freight, lorry, unspecified   transport, freight, lorry, unspecified   Cutoff, U - GLO | New flow. Data From Conab (2019). |
|----------------------------------------|---|--------------------------------------------------------------------------------------------------------------------|-----------------------------------|

**papaya production | papaya | Cutoff, U – GLO**

| Flow                                   | Original provider                                                                      | Modified provider                                                                     | Adaptation                        |
|----------------------------------------|----------------------------------------------------------------------------------------|---------------------------------------------------------------------------------------|-----------------------------------|
| Electricity, low voltage               | market group for electricity, low voltage   electricity, low voltage   Cutoff, U - GLO | market group for electricity, low voltage   electricity, low voltage   Cutoff, U - BR | Link to a new provider.           |
| Fertilising, by broadcaster            | Market for fertilising, by broadcaster   fertilising, by broadcaster   Cutoff, U - GLO | fertilising, by broadcaster   fertilising, by broadcaster   Cutoff, U - BR            | Link to a new provider.           |
| Irrigation                             | market group for irrigation   irrigation   Cutoff, U - GLO                             | market for irrigation   irrigation   Cutoff, U - BR                                   | Link to a new provider.           |
| Transport, freight, lorry, unspecified | -                                                                                      | market group for transport, freight, lorry, unspecified   transport, freight,         | New flow. Data From Conab (2019). |

|  |  |                                         |  |
|--|--|-----------------------------------------|--|
|  |  | lorry, unspecified  <br>Cutoff, U - GLO |  |
|--|--|-----------------------------------------|--|

#### mango production | mango | Cutoff, U – BR

| Flow                                      | Original provider | Modified provider                                                                                                                 | Adaptation                           |
|-------------------------------------------|-------------------|-----------------------------------------------------------------------------------------------------------------------------------|--------------------------------------|
| Transport, freight,<br>lorry, unspecified | -                 | market group for<br>transport, freight,<br>lorry, unspecified  <br>transport, freight,<br>lorry, unspecified  <br>Cutoff, U - GLO | New flow. Data<br>From Conab (2019). |

#### melon production | melon | Cutoff, U – GLO

| Flow                           | Original provider                                                                                     | Modified provider                                                                                 | Adaptation                 |
|--------------------------------|-------------------------------------------------------------------------------------------------------|---------------------------------------------------------------------------------------------------|----------------------------|
| Electricity, low<br>voltage    | market group for<br>electricity, low<br>voltage   electricity,<br>low voltage  <br>Cutoff, U - GLO    | market group for<br>electricity, low<br>voltage   electricity,<br>low voltage  <br>Cutoff, U - BR | Link to a new<br>provider. |
| Fertilising, by<br>broadcaster | Market for<br>fertilising, by<br>broadcaster  <br>fertilising, by<br>broadcaster  <br>Cutoff, U - GLO | fertilising, by<br>broadcaster  <br>fertilising, by<br>broadcaster  <br>Cutoff, U - BR            | Link to a new<br>provider. |
| Irrigation                     | market group for<br>irrigation                                                                        | market for<br>irrigation                                                                          | Link to a new<br>provider. |

|                                           |                                 |                                                                                                                                   |                                      |
|-------------------------------------------|---------------------------------|-----------------------------------------------------------------------------------------------------------------------------------|--------------------------------------|
|                                           | irrigation   Cutoff,<br>U - GLO | irrigation   Cutoff,<br>U - BR                                                                                                    |                                      |
| Transport, freight,<br>lorry, unspecified | -                               | market group for<br>transport, freight,<br>lorry, unspecified  <br>transport, freight,<br>lorry, unspecified  <br>Cutoff, U - GLO | New flow. Data<br>From Conab (2019). |

**mandarin production | mandarin | Cutoff, U – RoW**

| <b>Flow</b>                                                     | <b>Original provider</b>                                                                                                                                                | <b>Modified provider</b>                                                                                                                                 | <b>Adaptation</b>          |
|-----------------------------------------------------------------|-------------------------------------------------------------------------------------------------------------------------------------------------------------------------|----------------------------------------------------------------------------------------------------------------------------------------------------------|----------------------------|
| Application of plant<br>protection product,<br>by field sprayer | market for<br>application of plant<br>protection product,<br>by field sprayer  <br>application of plant<br>protection product,<br>by field sprayer  <br>Cutoff, U - GLO | application of plant<br>protection product,<br>by field sprayer  <br>application of plant<br>protection product,<br>by field sprayer  <br>Cutoff, U - BR | Link to a new<br>provider. |
| Fertilising, by<br>broadcaster                                  | Market for<br>fertilising, by<br>broadcaster  <br>fertilising, by<br>broadcaster  <br>Cutoff, U - GLO                                                                   | fertilising, by<br>broadcaster  <br>fertilising, by<br>broadcaster  <br>Cutoff, U - BR                                                                   | Link to a new<br>provider. |
| Irrigation                                                      | market group for<br>irrigation                                                                                                                                          | market for<br>irrigation                                                                                                                                 | Link to a new<br>provider. |

|                                           |                                 |                                                                                                                                   |                                      |
|-------------------------------------------|---------------------------------|-----------------------------------------------------------------------------------------------------------------------------------|--------------------------------------|
|                                           | irrigation   Cutoff,<br>U - GLO | irrigation   Cutoff,<br>U - BR                                                                                                    |                                      |
| Transport, freight,<br>lorry, unspecified | -                               | market group for<br>transport, freight,<br>lorry, unspecified  <br>transport, freight,<br>lorry, unspecified  <br>Cutoff, U - GLO | New flow. Data<br>From Conab (2019). |

**grape production | grape | Cutoff, U – RoW**

| <b>Flow</b>                               | <b>Original provider</b>                                            | <b>Modified provider</b>                                                                          | <b>Adaptation</b>                    |
|-------------------------------------------|---------------------------------------------------------------------|---------------------------------------------------------------------------------------------------|--------------------------------------|
| Electricity, low<br>voltage               | Mix from various<br>locations.                                      | market group for<br>electricity, low<br>voltage   electricity,<br>low voltage  <br>Cutoff, U - BR | Link to a new<br>provider.           |
| Fertilising, by<br>broadcaster            | Mix from various<br>locations.                                      | fertilising, by<br>broadcaster  <br>fertilising, by<br>broadcaster  <br>Cutoff, U - BR            | Link to a new<br>provider.           |
| Irrigation                                | market group for<br>irrigation  <br>irrigation   Cutoff,<br>U - GLO | market for<br>irrigation  <br>irrigation   Cutoff,<br>U - BR                                      | Link to a new<br>provider.           |
| Transport, freight,<br>lorry, unspecified | -                                                                   | market group for<br>transport, freight,<br>lorry, unspecified                                     | New flow. Data<br>From Conab (2019). |

|  |  |                                                                |  |
|--|--|----------------------------------------------------------------|--|
|  |  | transport, freight,<br>lorry, unspecified  <br>Cutoff, U - GLO |  |
|--|--|----------------------------------------------------------------|--|

**apricot production | apricot | Cutoff, U – RoW**

| <b>Flow</b>                                               | <b>Original provider</b>                                                                                                                           | <b>Modified provider</b>                                                                                                               | <b>Adaptation</b>       |
|-----------------------------------------------------------|----------------------------------------------------------------------------------------------------------------------------------------------------|----------------------------------------------------------------------------------------------------------------------------------------|-------------------------|
| Application of plant protection product, by field sprayer | market for application of plant protection product, by field sprayer   application of plant protection product, by field sprayer   Cutoff, U - GLO | application of plant protection product, by field sprayer   application of plant protection product, by field sprayer   Cutoff, U - BR | Link to a new provider. |
| Fertilising, by broadcaster                               | Market for fertilising, by broadcaster   fertilising, by broadcaster   Cutoff, U - GLO                                                             | fertilising, by broadcaster   fertilising, by broadcaster   Cutoff, U - BR                                                             | Link to a new provider. |
| Irrigation                                                | Mix from various locations.                                                                                                                        | market for irrigation   irrigation   Cutoff, U - BR                                                                                    | Link to a new provider. |
| Transport, tractor and trailer, agricultural              | market for transport, tractor and trailer, agricultural                                                                                            | market for transport, tractor and trailer, agricultural                                                                                | Link to a new provider. |

|  |                                                               |                                                                |  |
|--|---------------------------------------------------------------|----------------------------------------------------------------|--|
|  | transport, tractor and trailer, agricultural   Cutoff, U - CH | transport, tractor and trailer, agricultural   Cutoff, U - RoW |  |
|--|---------------------------------------------------------------|----------------------------------------------------------------|--|

#### lemon production | lemon | Cutoff, U – RoW

| Flow                                                      | Original provider                                                                                                                                  | Modified provider                                                                                                                      | Adaptation              |
|-----------------------------------------------------------|----------------------------------------------------------------------------------------------------------------------------------------------------|----------------------------------------------------------------------------------------------------------------------------------------|-------------------------|
| Application of plant protection product, by field sprayer | market for application of plant protection product, by field sprayer   application of plant protection product, by field sprayer   Cutoff, U - GLO | application of plant protection product, by field sprayer   application of plant protection product, by field sprayer   Cutoff, U - BR | Link to a new provider. |
| Fertilising, by broadcaster                               | Market for fertilising, by broadcaster   fertilising, by broadcaster   Cutoff, U - GLO                                                             | fertilising, by broadcaster   fertilising, by broadcaster   Cutoff, U - BR                                                             | Link to a new provider. |
| Irrigation                                                | Mix from various locations.                                                                                                                        | market for irrigation   irrigation   Cutoff, U - BR                                                                                    | Link to a new provider. |
| Transport, tractor and trailer, agricultural              | market for transport, tractor and trailer,                                                                                                         | market for transport, tractor and trailer,                                                                                             | Link to a new provider. |



|                                           |                                                                                          |                                                                                                                                   |                                      |
|-------------------------------------------|------------------------------------------------------------------------------------------|-----------------------------------------------------------------------------------------------------------------------------------|--------------------------------------|
|                                           | agricultural  <br>transport, tractor<br>and trailer,<br>agricultural  <br>Cutoff, U - CH | agricultural  <br>transport, tractor<br>and trailer,<br>agricultural  <br>Cutoff, U - RoW                                         |                                      |
| Transport, freight,<br>lorry, unspecified | -                                                                                        | market group for<br>transport, freight,<br>lorry, unspecified  <br>transport, freight,<br>lorry, unspecified  <br>Cutoff, U - GLO | New flow. Data<br>From Conab (2019). |

**avocado production | avocado | Cutoff, U – GLO**

| <b>Flow</b>                    | <b>Original provider</b>                                                                              | <b>Modified provider</b>                                                                          | <b>Adaptation</b>          |
|--------------------------------|-------------------------------------------------------------------------------------------------------|---------------------------------------------------------------------------------------------------|----------------------------|
| Electricity, low<br>voltage    | market group for<br>electricity, low<br>voltage   electricity,<br>low voltage  <br>Cutoff, U - GLO    | market group for<br>electricity, low<br>voltage   electricity,<br>low voltage  <br>Cutoff, U - BR | Link to a new<br>provider. |
| Fertilising, by<br>broadcaster | Market for<br>fertilising, by<br>broadcaster  <br>fertilising, by<br>broadcaster  <br>Cutoff, U - GLO | fertilising, by<br>broadcaster  <br>fertilising, by<br>broadcaster  <br>Cutoff, U - BR            | Link to a new<br>provider. |
| Irrigation                     | market group for<br>irrigation                                                                        | market for<br>irrigation                                                                          | Link to a new<br>provider. |

|                                           |                                 |                                                                                                                                   |                                      |
|-------------------------------------------|---------------------------------|-----------------------------------------------------------------------------------------------------------------------------------|--------------------------------------|
|                                           | irrigation   Cutoff,<br>U - GLO | irrigation   Cutoff,<br>U - BR                                                                                                    |                                      |
| Transport, freight,<br>lorry, unspecified | -                               | market group for<br>transport, freight,<br>lorry, unspecified  <br>transport, freight,<br>lorry, unspecified  <br>Cutoff, U - GLO | New flow. Data<br>From Conab (2019). |

**pear production | pear | Cutoff, U – RoW**

| <b>Flow</b>                                                     | <b>Original provider</b>                                                                                                                                                | <b>Modified provider</b>                                                                                                                                 | <b>Adaptation</b>          |
|-----------------------------------------------------------------|-------------------------------------------------------------------------------------------------------------------------------------------------------------------------|----------------------------------------------------------------------------------------------------------------------------------------------------------|----------------------------|
| Application of plant<br>protection product,<br>by field sprayer | market for<br>application of plant<br>protection product,<br>by field sprayer  <br>application of plant<br>protection product,<br>by field sprayer  <br>Cutoff, U - GLO | application of plant<br>protection product,<br>by field sprayer  <br>application of plant<br>protection product,<br>by field sprayer  <br>Cutoff, U - BR | Link to a new<br>provider. |
| Fertilising, by<br>broadcaster                                  | Market for<br>fertilising, by<br>broadcaster  <br>fertilising, by<br>broadcaster  <br>Cutoff, U - GLO                                                                   | fertilising, by<br>broadcaster  <br>fertilising, by<br>broadcaster  <br>Cutoff, U - BR                                                                   | Link to a new<br>provider. |
| Irrigation                                                      | Mix from various<br>locations.                                                                                                                                          | market for<br>irrigation                                                                                                                                 | Link to a new<br>provider. |

|                                                    |                                                                                                                                              |                                                                                                                                               |                                      |
|----------------------------------------------------|----------------------------------------------------------------------------------------------------------------------------------------------|-----------------------------------------------------------------------------------------------------------------------------------------------|--------------------------------------|
|                                                    |                                                                                                                                              | irrigation   Cutoff,<br>U - BR                                                                                                                |                                      |
| Transport, tractor<br>and trailer,<br>agricultural | market for<br>transport, tractor<br>and trailer,<br>agricultural  <br>transport, tractor<br>and trailer,<br>agricultural  <br>Cutoff, U - CH | market for<br>transport, tractor<br>and trailer,<br>agricultural  <br>transport, tractor<br>and trailer,<br>agricultural  <br>Cutoff, U - RoW | Link to a new<br>provider.           |
| Transport, freight,<br>lorry, unspecified          | -                                                                                                                                            | market group for<br>transport, freight,<br>lorry, unspecified  <br>transport, freight,<br>lorry, unspecified  <br>Cutoff, U - GLO             | New flow. Data<br>From Conab (2019). |

**peach production | peach | Cutoff, U – RoW**

| Flow                                                            | Original provider                                                                                                                                                       | Modified provider                                                                                                                                        | Adaptation                 |
|-----------------------------------------------------------------|-------------------------------------------------------------------------------------------------------------------------------------------------------------------------|----------------------------------------------------------------------------------------------------------------------------------------------------------|----------------------------|
| Application of plant<br>protection product,<br>by field sprayer | market for<br>application of plant<br>protection product,<br>by field sprayer  <br>application of plant<br>protection product,<br>by field sprayer  <br>Cutoff, U - GLO | application of plant<br>protection product,<br>by field sprayer  <br>application of plant<br>protection product,<br>by field sprayer  <br>Cutoff, U - BR | Link to a new<br>provider. |

|                                              |                                                                                                                         |                                                                                                                          |                                   |
|----------------------------------------------|-------------------------------------------------------------------------------------------------------------------------|--------------------------------------------------------------------------------------------------------------------------|-----------------------------------|
| Fertilising, by broadcaster                  | Market for fertilising, by broadcaster   fertilising, by broadcaster   Cutoff, U - GLO                                  | fertilising, by broadcaster   fertilising, by broadcaster   Cutoff, U - BR                                               | Link to a new provider.           |
| Irrigation                                   | Mix from various locations.                                                                                             | market for irrigation   irrigation   Cutoff, U - BR                                                                      | Link to a new provider.           |
| Transport, tractor and trailer, agricultural | market for transport, tractor and trailer, agricultural   transport, tractor and trailer, agricultural   Cutoff, U - CH | market for transport, tractor and trailer, agricultural   transport, tractor and trailer, agricultural   Cutoff, U - RoW | Link to a new provider.           |
| Transport, freight, lorry, unspecified       | -                                                                                                                       | market group for transport, freight, lorry, unspecified   transport, freight, lorry, unspecified   Cutoff, U - GLO       | New flow. Data From Conab (2019). |

| Flow | Original provider | Modified provider | Adaptation |
|------|-------------------|-------------------|------------|
|------|-------------------|-------------------|------------|

|                                        |                                                                                        |                                                                                                                    |                                   |
|----------------------------------------|----------------------------------------------------------------------------------------|--------------------------------------------------------------------------------------------------------------------|-----------------------------------|
| Electricity, low voltage               | market group for electricity, low voltage   electricity, low voltage   Cutoff, U - GLO | market group for electricity, low voltage   electricity, low voltage   Cutoff, U - BR                              | Link to a new provider.           |
| Fertilising, by broadcaster            | Market for fertilising, by broadcaster   fertilising, by broadcaster   Cutoff, U - GLO | fertilising, by broadcaster   fertilising, by broadcaster   Cutoff, U - BR                                         | Link to a new provider.           |
| Irrigation                             | market group for irrigation   irrigation   Cutoff, U - GLO                             | market for irrigation   irrigation   Cutoff, U - BR                                                                | Link to a new provider.           |
| Transport, freight, lorry, unspecified | -                                                                                      | market group for transport, freight, lorry, unspecified   transport, freight, lorry, unspecified   Cutoff, U - GLO | New flow. Data From Conab (2019). |

**strawberry production, open field, macro tunnel | strawberry | Cutoff, U – RoW**

| Flow       | Original provider           | Modified provider                                   | Adaptation              |
|------------|-----------------------------|-----------------------------------------------------|-------------------------|
| Irrigation | Mix from various locations. | market for irrigation   irrigation   Cutoff, U - BR | Link to a new provider. |

|                                        |                                                                                                    |                                                                                                                            |                                             |
|----------------------------------------|----------------------------------------------------------------------------------------------------|----------------------------------------------------------------------------------------------------------------------------|---------------------------------------------|
| Strawberry seedling, for planting      | market for strawberry seedling, for planting   strawberry seedling, for planting   Cutoff, U - GLO | strawberry seedling production, in unheated greenhouse, for planting   strawberry seedling, for planting   Cutoff, U - RoW | Link to new provider and energy mix update. |
| Transport, freight, lorry, unspecified | -                                                                                                  | market group for transport, freight, lorry, unspecified   transport, freight, lorry, unspecified   Cutoff, U - GLO         | New flow. Data From Conab (2019).           |

## Oleaginosas

### coconut production, dehusked | coconut, dehusked | Cutoff, U – RoW

| Flow                                         | Original provider                                       | Modified provider                                       | Adaptation              |
|----------------------------------------------|---------------------------------------------------------|---------------------------------------------------------|-------------------------|
| Irrigation                                   | Mix from various locations.                             | market for irrigation   irrigation   Cutoff, U - BR     | Link to a new provider. |
| Transport, tractor and trailer, agricultural | market for transport, tractor and trailer, agricultural | market for transport, tractor and trailer, agricultural | Link to a new provider. |

|                                        |                                                               |                                                                                                                    |                                   |
|----------------------------------------|---------------------------------------------------------------|--------------------------------------------------------------------------------------------------------------------|-----------------------------------|
|                                        | transport, tractor and trailer, agricultural   Cutoff, U - CH | transport, tractor and trailer, agricultural   Cutoff, U - RoW                                                     |                                   |
| Transport, freight, lorry, unspecified | -                                                             | market group for transport, freight, lorry, unspecified   transport, freight, lorry, unspecified   Cutoff, U - GLO | New flow. Data From Conab (2019). |

**cashew production | cashew | Cutoff, U – RoW**

| Flow                                         | Original provider                                                                                                       | Modified provider                                                                                                        | Adaptation              |
|----------------------------------------------|-------------------------------------------------------------------------------------------------------------------------|--------------------------------------------------------------------------------------------------------------------------|-------------------------|
| Irrigation                                   | Mix from various locations.                                                                                             | market for irrigation   irrigation   Cutoff, U - BR                                                                      | Link to a new provider. |
| Transport, tractor and trailer, agricultural | market for transport, tractor and trailer, agricultural   transport, tractor and trailer, agricultural   Cutoff, U - CH | market for transport, tractor and trailer, agricultural   transport, tractor and trailer, agricultural   Cutoff, U - RoW | Link to a new provider. |

**peanut production | peanut | Cutoff, U – RoW**

| Flow | Original provider | Modified provider | Adaptation |
|------|-------------------|-------------------|------------|
|------|-------------------|-------------------|------------|

|                                                           |                                                                                                                                                    |                                                                                                                                        |                         |
|-----------------------------------------------------------|----------------------------------------------------------------------------------------------------------------------------------------------------|----------------------------------------------------------------------------------------------------------------------------------------|-------------------------|
| Application of plant protection product, by field sprayer | market for application of plant protection product, by field sprayer   application of plant protection product, by field sprayer   Cutoff, U - GLO | application of plant protection product, by field sprayer   application of plant protection product, by field sprayer   Cutoff, U - BR | Link to a new provider. |
| Combine harversting                                       | market for combine harvesting   combine harvesting   Cutoff, U - GLO                                                                               | combine harvesting   combine harvesting   Cutoff, U - BR                                                                               | Link to a new provider. |
| Fertilising, by broadcaster                               | Market for fertilising, by broadcaster   fertilising, by broadcaster   Cutoff, U - GLO                                                             | fertilising, by broadcaster   fertilising, by broadcaster   Cutoff, U - BR                                                             | Link to a new provider. |
| Irrigation                                                | Mix from various locations.                                                                                                                        | market for irrigation   irrigation   Cutoff, U - BR                                                                                    | Link to a new provider. |
| Transport, tractor and trailer, agricultural              | market for transport, tractor and trailer, agricultural   transport, tractor and trailer,                                                          | market for transport, tractor and trailer, agricultural   transport, tractor and trailer,                                              | Link to a new provider. |



|  |                                  |                                   |  |
|--|----------------------------------|-----------------------------------|--|
|  | agricultural  <br>Cutoff, U - CH | agricultural  <br>Cutoff, U - RoW |  |
|--|----------------------------------|-----------------------------------|--|

#### linseed production | linseed | Cutoff, U – RoW

| Flow                                                      | Original provider                                                                                                                                  | Modified provider                                                                                                                      | Adaptation              |
|-----------------------------------------------------------|----------------------------------------------------------------------------------------------------------------------------------------------------|----------------------------------------------------------------------------------------------------------------------------------------|-------------------------|
| Application of plant protection product, by field sprayer | market for application of plant protection product, by field sprayer   application of plant protection product, by field sprayer   Cutoff, U - GLO | application of plant protection product, by field sprayer   application of plant protection product, by field sprayer   Cutoff, U - BR | Link to a new provider. |
| Combine harvester                                         | market for combine harvesting   combine harvesting   Cutoff, U - GLO                                                                               | combine harvesting   combine harvesting   Cutoff, U - BR                                                                               | Link to a new provider. |
| Fertilising, by broadcaster                               | Market for fertilising, by broadcaster   fertilising, by broadcaster   Cutoff, U - GLO                                                             | fertilising, by broadcaster   fertilising, by broadcaster   Cutoff, U - BR                                                             | Link to a new provider. |
| Irrigation                                                | Mix from various locations.                                                                                                                        | market for irrigation   irrigation   Cutoff, U - BR                                                                                    | Link to a new provider. |

|                                              |                                                                                                                         |                                                                                                                          |                                             |
|----------------------------------------------|-------------------------------------------------------------------------------------------------------------------------|--------------------------------------------------------------------------------------------------------------------------|---------------------------------------------|
| Linseed seed, for sowing                     | market for linseed seed, for sowing   linseed seed, for sowing   Cutoff, U - GLO                                        | linseed seed production, for sowing   linseed seed, for sowing   Cutoff, U - RoW                                         | Link to new provider and energy mix update. |
| Transport, tractor and trailer, agricultural | market for transport, tractor and trailer, agricultural   transport, tractor and trailer, agricultural   Cutoff, U - CH | market for transport, tractor and trailer, agricultural   transport, tractor and trailer, agricultural   Cutoff, U - RoW | Link to a new provider.                     |

**sesame seed production | sesame seed | Cutoff, U – RoW**

| <b>Flow</b>                                  | <b>Original provider</b>                                                                                                | <b>Modified provider</b>                                                                                                 | <b>Adaptation</b>       |
|----------------------------------------------|-------------------------------------------------------------------------------------------------------------------------|--------------------------------------------------------------------------------------------------------------------------|-------------------------|
| Irrigation                                   | Mix from various locations.                                                                                             | market for irrigation   irrigation   Cutoff, U - BR                                                                      | Link to a new provider. |
| Transport, tractor and trailer, agricultural | market for transport, tractor and trailer, agricultural   transport, tractor and trailer, agricultural   Cutoff, U - CH | market for transport, tractor and trailer, agricultural   transport, tractor and trailer, agricultural   Cutoff, U - RoW | Link to a new provider. |

**almond production | almond | Cutoff, U – RoW**

| <b>Flow</b>                                               | <b>Original provider</b>                                                                                                                           | <b>Modified provider</b>                                                                                                               | <b>Adaptation</b>       |
|-----------------------------------------------------------|----------------------------------------------------------------------------------------------------------------------------------------------------|----------------------------------------------------------------------------------------------------------------------------------------|-------------------------|
| Application of plant protection product, by field sprayer | market for application of plant protection product, by field sprayer   application of plant protection product, by field sprayer   Cutoff, U - GLO | application of plant protection product, by field sprayer   application of plant protection product, by field sprayer   Cutoff, U - BR | Link to a new provider. |
| Fertilising, by broadcaster                               | Market for fertilising, by broadcaster   fertilising, by broadcaster   Cutoff, U - GLO                                                             | fertilising, by broadcaster   fertilising, by broadcaster   Cutoff, U - BR                                                             | Link to a new provider. |
| Irrigation                                                | Mix from various locations.                                                                                                                        | market for irrigation   irrigation   Cutoff, U - BR                                                                                    | Link to a new provider. |
| Transport, tractor and trailer, agricultural              | market for transport, tractor and trailer, agricultural   transport, tractor and trailer, agricultural   Cutoff, U - CH                            | market for transport, tractor and trailer, agricultural   transport, tractor and trailer, agricultural   Cutoff, U - RoW               | Link to a new provider. |

**palm fruit bunch production | palm fruit bunch | Cutoff, U – RoW**

| <b>Flow</b>                                               | <b>Original provider</b>                                                                                                                           | <b>Modified provider</b>                                                                                                               | <b>Adaptation</b>                           |
|-----------------------------------------------------------|----------------------------------------------------------------------------------------------------------------------------------------------------|----------------------------------------------------------------------------------------------------------------------------------------|---------------------------------------------|
| Application of plant protection product, by field sprayer | market for application of plant protection product, by field sprayer   application of plant protection product, by field sprayer   Cutoff, U - GLO | application of plant protection product, by field sprayer   application of plant protection product, by field sprayer   Cutoff, U - BR | Link to a new provider.                     |
| Dolomite                                                  | market for dolomite   dolomite   Cutoff, U - RER                                                                                                   | dolomite production   dolomite   Cutoff, U - RoW                                                                                       | Link to new provider and energy mix update. |
| Fertilising, by broadcaster                               | Market for fertilising, by broadcaster   fertilising, by broadcaster   Cutoff, U - GLO                                                             | fertilising, by broadcaster   fertilising, by broadcaster   Cutoff, U - BR                                                             | Link to a new provider.                     |
| Irrigation                                                | Mix from various locations.                                                                                                                        | market for irrigation   irrigation   Cutoff, U - BR                                                                                    | Link to a new provider.                     |
| Lime                                                      | market for lime   lime   Cutoff, U - RER                                                                                                           | lime production, milled, loose   lime   Cutoff, U - RoW                                                                                | Link to new provider and energy mix update. |

|                                              |                                                                                                                         |                                                                                                                          |                         |
|----------------------------------------------|-------------------------------------------------------------------------------------------------------------------------|--------------------------------------------------------------------------------------------------------------------------|-------------------------|
| Transport, tractor and trailer, agricultural | market for transport, tractor and trailer, agricultural   transport, tractor and trailer, agricultural   Cutoff, U - CH | market for transport, tractor and trailer, agricultural   transport, tractor and trailer, agricultural   Cutoff, U - RoW | Link to a new provider. |
|----------------------------------------------|-------------------------------------------------------------------------------------------------------------------------|--------------------------------------------------------------------------------------------------------------------------|-------------------------|

## Flour and pasta

### maize grain processing, dry milling | maize flour | Cutoff, U – RoW

| Flow                                   | Original provider                                                            | Modified provider                                                                     | Adaptation                                  |
|----------------------------------------|------------------------------------------------------------------------------|---------------------------------------------------------------------------------------|---------------------------------------------|
| Building, multi-storey                 | market for building, multi-storey   building, multi-storey   Cutoff, U - GLO | building construction, multi-storey   building, multi-storey   Cutoff, U - RoW        | Link to new provider and energy mix update. |
| Electricity, low voltage               | Mix from various locations.                                                  | market group for electricity, low voltage   electricity, low voltage   Cutoff, U - BR | Link to a new provider.                     |
| Industrial machine, heavy, unspecified | market for industrial machine, heavy, unspecified   industrial               | market for industrial machine, heavy, unspecified   industrial machine,               | Link to a new provider.                     |

|             |                                                              |                                                             |                            |
|-------------|--------------------------------------------------------------|-------------------------------------------------------------|----------------------------|
|             | machine, heavy,<br>unspecified  <br>Cutoff, U - RER          | heavy, unspecified  <br>Cutoff, U - RoW                     |                            |
| Maize grain | market for maize<br>grain   maize grain<br>  Cutoff, U - RoW | market for maize<br>grain   maize grain<br>  Cutoff, U - BR | Link to a new<br>provider. |
| Tap water   | Mix from various<br>locations.                               | market for tap<br>water   tap water  <br>Cutoff, U - BR     | Link to a new<br>provider. |

**oat production | oat grain | Cutoff, U – RoW**

| <b>Flow</b>                                                     | <b>Original provider</b>                                                                                                                                                | <b>Modified provider</b>                                                                                                                                 | <b>Adaptation</b>                                 |
|-----------------------------------------------------------------|-------------------------------------------------------------------------------------------------------------------------------------------------------------------------|----------------------------------------------------------------------------------------------------------------------------------------------------------|---------------------------------------------------|
| Application of plant<br>protection product,<br>by field sprayer | market for<br>application of plant<br>protection product,<br>by field sprayer  <br>application of plant<br>protection product,<br>by field sprayer  <br>Cutoff, U - GLO | application of plant<br>protection product,<br>by field sprayer  <br>application of plant<br>protection product,<br>by field sprayer  <br>Cutoff, U - BR | Link to a new<br>provider.                        |
| Combine harvesting                                              | market for combine<br>harvesting  <br>combine harvesting<br>  Cutoff, U - GLO                                                                                           | combine harvesting<br>  combine<br>harvesting   Cutoff,<br>U - BR                                                                                        | Link to a new<br>provider.                        |
| Drying of bread<br>grain, seed and<br>legumes                   | market for drying of<br>bread grain, seed<br>and legumes  <br>drying of bread                                                                                           | drying of bread<br>grain, seed and<br>legumes   drying of<br>bread grain, seed                                                                           | Link to new<br>provider and energy<br>mix update. |

|                                              |                                                                                                                         |                                                                                                                          |                                             |
|----------------------------------------------|-------------------------------------------------------------------------------------------------------------------------|--------------------------------------------------------------------------------------------------------------------------|---------------------------------------------|
|                                              | grain, seed and legumes   Cutoff, U - GLO                                                                               | and legumes   Cutoff, U - RoW                                                                                            |                                             |
| Fertilising, by broadcaster                  | Market for fertilising, by broadcaster   fertilising, by broadcaster   Cutoff, U - GLO                                  | fertilising, by broadcaster   fertilising, by broadcaster   Cutoff, U - BR                                               | Link to a new provider.                     |
| Lime                                         | market for lime   lime   Cutoff, U - RER                                                                                | lime production, milled, loose   lime   Cutoff, U - RoW                                                                  | Link to new provider and energy mix update. |
| Transport, tractor and trailer, agricultural | market for transport, tractor and trailer, agricultural   transport, tractor and trailer, agricultural   Cutoff, U - CH | market for transport, tractor and trailer, agricultural   transport, tractor and trailer, agricultural   Cutoff, U - RoW | Link to a new provider.                     |

## Meat

**swine production | swine for slaughtering, live weight | Cutoff, U – RoW**

| Flow | Original provider | Modified provider | Adaptation |
|------|-------------------|-------------------|------------|
|------|-------------------|-------------------|------------|

|                                                                    |                                                                                                                                                                      |                                                                                                                                            |                                             |
|--------------------------------------------------------------------|----------------------------------------------------------------------------------------------------------------------------------------------------------------------|--------------------------------------------------------------------------------------------------------------------------------------------|---------------------------------------------|
| barley grain, feed                                                 | market for barley grain, feed   barley grain, feed   Cutoff, U - GLO                                                                                                 | barley grain, feed production   barley grain, feed   Cutoff, U - RoW                                                                       | Link to new provider and energy mix update. |
| limestone, crushed, washed                                         | market for limestone, crushed, washed   limestone, crushed, washed   Cutoff, U - CH                                                                                  | limestone production, crushed, washed   limestone, crushed, washed   Cutoff, U - RoW                                                       | Link to new provider and energy mix update. |
| maize grain, feed                                                  | market for maize grain, feed   maize grain, feed   Cutoff, U - RoW                                                                                                   | maize grain, feed production   maize grain, feed   Cutoff, U - RoW                                                                         | Link to new provider and energy mix update. |
| oat grain                                                          | market for oat grain   oat grain   Cutoff, U - GLO                                                                                                                   | oat production   oat grain   Cutoff, U - RoW                                                                                               | Link to new provider and energy mix update. |
| operation, housing system, pig, fully-slatted floor, per pig place | market for operation, housing system, pig, fully-slatted floor, per pig place   operation, housing system, pig, fully-slatted floor, per pig place   Cutoff, U - GLO | operation, housing system, pig, fully-slatted floor   operation, housing system, pig, fully-slatted floor, per pig place   Cutoff, U - RoW | Link to new provider and energy mix update. |



|                                        |                                                                                                                    |                                                                                |                                                                                                                                           |
|----------------------------------------|--------------------------------------------------------------------------------------------------------------------|--------------------------------------------------------------------------------|-------------------------------------------------------------------------------------------------------------------------------------------|
| rape meal                              | market for rape meal   rape meal   Cutoff, U - GLO                                                                 | rape oil mill operation   rape meal   Cutoff, U - RoW                          | Link to new provider and energy mix update.                                                                                               |
| sodium chloride, powder                | market for sodium chloride, powder   sodium chloride, powder   Cutoff, U - GLO                                     | sodium chloride production, powder   sodium chloride, powder   Cutoff, U - RoW | Link to new provider and energy mix update.                                                                                               |
| Soybean, feed                          | market for soybean, feed   soybean, feed   Cutoff, U - GLO                                                         | soybean, feed production   soybean, feed   Cutoff, U - RoW                     | Link to new provider and energy mix update.                                                                                               |
| wheat grain, feed                      | market for wheat grain, feed   wheat grain, feed   Cutoff, U - GLO                                                 | wheat grain, feed production   wheat grain, feed   Cutoff, U - RoW             | Link to new provider and energy mix update.                                                                                               |
| whey                                   | market for whey   whey   Cutoff, U - GLO                                                                           | tofu production   whey   Cutoff, U - RoW                                       | Link to new provider and energy mix update.                                                                                               |
| transport, freight, lorry, unspecified | market group for transport, freight, lorry, unspecified   transport, freight, lorry, unspecified   Cutoff, U - GLO | -                                                                              | New flow. Amount data from process market for swine for slaughtering, live weight   swine for slaughtering, live weight   Cutoff, U - GLO |

**chicken production | chicken for slaughtering, live weight | Cutoff, U – GLO**

| <b>Flow</b>                            | <b>Original provider</b>                                                                                           | <b>Modified provider</b>                                                               | <b>Adaptation</b>                                                                                                                             |
|----------------------------------------|--------------------------------------------------------------------------------------------------------------------|----------------------------------------------------------------------------------------|-----------------------------------------------------------------------------------------------------------------------------------------------|
| electricity, low voltage               | market group for electricity, low voltage   electricity, high voltage   Cutoff, U - GLO                            | market group for electricity, low voltage   electricity, high voltage   Cutoff, U - BR | Link to a new provider.                                                                                                                       |
| energy feed, gross                     | market for energy feed, gross   energy feed, gross   Cutoff, U - ZA                                                | market for energy feed, gross   energy feed, gross   Cutoff, U - RoW                   | Link to a new provider.                                                                                                                       |
| shed                                   | market for shed   shed   Cutoff, U - GLO                                                                           | shed construction   shed   Cutoff, U - RoW                                             | Link to new provider and energy mix update.                                                                                                   |
| transport, freight, lorry, unspecified | market group for transport, freight, lorry, unspecified   transport, freight, lorry, unspecified   Cutoff, U - GLO | -                                                                                      | New flow. Amount data from process market for chicken for slaughtering, live weight   chicken for slaughtering, live weight   Cutoff, U - GLO |

**demersal fish to generic market for marine fish | fish, marine | Cutoff, U – GLO**

| <b>Flow</b> | <b>Original provider</b> | <b>Modified provider</b> | <b>Adaptation</b> |
|-------------|--------------------------|--------------------------|-------------------|
|-------------|--------------------------|--------------------------|-------------------|

|                                        |                                                                                                                                                                                                                                                                                                    |                                                                                                      |                                                                                     |
|----------------------------------------|----------------------------------------------------------------------------------------------------------------------------------------------------------------------------------------------------------------------------------------------------------------------------------------------------|------------------------------------------------------------------------------------------------------|-------------------------------------------------------------------------------------|
| demersal fish, fresh                   | <p>hake, capture by trawler and landing whole, fresh   demersal fish, fresh   Cutoff, U – NA</p> <p>hake, capture by trawler and landing whole, fresh   demersal fish, fresh   Cutoff, U – ES</p> <p>hake, capture by trawler and landing whole, fresh   demersal fish, fresh   Cutoff, U - PE</p> | <p>hake, capture by trawler and landing whole, fresh   demersal fish, fresh   Cutoff, U – RoW</p>    | Link to new provider and energy mix update.                                         |
| demersal fish, fresh                   | <p>hake, capture by long liner and landing whole, fresh   demersal fish, fresh   Cutoff, U - RER</p>                                                                                                                                                                                               | <p>hake, capture by long liner and landing whole, fresh   demersal fish, fresh   Cutoff, U - RoW</p> | Link to new provider and energy mix update.                                         |
| transport, freight, lorry, unspecified | <p>market for transport, freight, lorry with refrigeration machine, cooling   transport, freight,</p>                                                                                                                                                                                              | -                                                                                                    | New flow. Amount data from process market for demersal fish, fresh   demersal fish, |

|  |                                                                      |  |                            |
|--|----------------------------------------------------------------------|--|----------------------------|
|  | lorry with<br>refrigeration<br>machine, cooling  <br>Cutoff, U - GLO |  | fresh   Cutoff, U -<br>GLO |
|--|----------------------------------------------------------------------|--|----------------------------|

**fish canning, small fish | fish canning, small fish | Cutoff, U – RoW**

| <b>Flow</b>                 | <b>Original provider</b>                                                      | <b>Modified provider</b>                                                                           | <b>Adaptation</b>                                 |
|-----------------------------|-------------------------------------------------------------------------------|----------------------------------------------------------------------------------------------------|---------------------------------------------------|
| Electricity, low<br>voltage | Mix from various<br>locations.                                                | market group for<br>electricity, low<br>voltage   electricity,<br>low voltage  <br>Cutoff, U - BR  | Link to a new<br>provider.                        |
| fish canning plant          | market for fish<br>canning plant   fish<br>canning plant  <br>Cutoff, U - GLO | fish canning plant<br>construction and<br>maintenance   fish<br>canning plant  <br>Cutoff, U - RoW | Link to new<br>provider and energy<br>mix update. |
| Fish, marine                | -                                                                             | demersal fish to<br>generic market for<br>marine fish   fish,<br>marine   Cutoff, U –<br>GLO       | New flow. Energy<br>mix update.                   |

**tilapia production, extensive aquaculture, in pond | tilapia | Cutoff, U – GLO**

| <b>Flow</b> | <b>Original provider</b> | <b>Modified provider</b> | <b>Adaptation</b> |
|-------------|--------------------------|--------------------------|-------------------|
|-------------|--------------------------|--------------------------|-------------------|

|                                                               |                                                                                          |                                                                                                                         |                                                                                   |
|---------------------------------------------------------------|------------------------------------------------------------------------------------------|-------------------------------------------------------------------------------------------------------------------------|-----------------------------------------------------------------------------------|
| Concrete, normal                                              | Mix from various locations.                                                              | market for concrete, normal   concrete, normal   Cutoff, U - BR                                                         | Link to a new provider.                                                           |
| Electricity, medium voltage                                   | Mix from various locations.                                                              | market group for electricity, medium voltage   electricity, medium voltage   Cutoff, U - BR                             | Link to a new provider.                                                           |
| quicklime, milled, packed                                     | market for quicklime, milled, packed   quicklime, milled, packed   Cutoff, U - RER       | market for quicklime, milled, packed   quicklime, milled, packed   Cutoff, U - RoW                                      | Link to a new provider.                                                           |
| tilapia feed, 24-28% protein                                  | market for tilapia feed, 24-28% protein   tilapia feed, 24-28% protein   Cutoff, U - GLO | tilapia feed production, commercial   tilapia feed, 24-28% protein   Cutoff, U - RoW                                    | Link to new provider and energy mix update.                                       |
| transport, freight, lorry with refrigeration machine, cooling | -                                                                                        | market for transport, freight, lorry with refrigeration machine, cooling   transport, freight, lorry with refrigeration | New flow. Amount data from process market for tilapia   tilapia   Cutoff, U - GLO |

|  |  |                                       |  |
|--|--|---------------------------------------|--|
|  |  | machine, cooling  <br>Cutoff, U - GLO |  |
|--|--|---------------------------------------|--|

**sheep production, for meat | sheep for slaughtering, live weight | Cutoff, U – RoW**

| <b>Flow</b>                 | <b>Original provider</b>                                                                                                                       | <b>Modified provider</b>                                                   | <b>Adaptation</b>                           |
|-----------------------------|------------------------------------------------------------------------------------------------------------------------------------------------|----------------------------------------------------------------------------|---------------------------------------------|
| Fertilising, by broadcaster | Market for fertilising, by broadcaster   fertilising, by broadcaster   Cutoff, U - GLO                                                         | fertilising, by broadcaster   fertilising, by broadcaster   Cutoff, U - BR | Link to a new provider.                     |
| Irrigation                  | Mix from various locations.                                                                                                                    | market for irrigation   irrigation   Cutoff, U - BR                        | Link to a new provider.                     |
| Lime                        | market for lime   lime   Cutoff, U - RER                                                                                                       | lime production, milled, loose   lime   Cutoff, U - RoW                    | Link to new provider and energy mix update. |
| Lime, packed                | market for lime, packed   lime, packed   Cutoff, U - Europe without Switzerland<br><br>market for lime, packed   lime, packed   Cutoff, U - CH | market for lime, packed   lime, packed   Cutoff, U - RoW                   | Link to a new provider.                     |

|                                        |                                                       |                                                                                                                    |                                                                                                                                                 |
|----------------------------------------|-------------------------------------------------------|--------------------------------------------------------------------------------------------------------------------|-------------------------------------------------------------------------------------------------------------------------------------------------|
| Maize grain                            | market for maize grain   maize grain   Cutoff, U - ZA | market for maize grain   maize grain   Cutoff, U - BR                                                              | Link to a new provider.                                                                                                                         |
| transport, freight, lorry, unspecified | -                                                     | market group for transport, freight, lorry, unspecified   transport, freight, lorry, unspecified   Cutoff, U - GLO | New flow. Amount data from process <i>market for sheep for slaughtering, live weight   sheep for slaughtering, live weight   Cutoff, U- GLO</i> |

## Dairy products

**milk production, from cow | cow milk | Cutoff, U – RoW**

| Flow               | Original provider                                                    | Modified provider                                                    | Adaptation                                  |
|--------------------|----------------------------------------------------------------------|----------------------------------------------------------------------|---------------------------------------------|
| barley grain, feed | market for barley grain, feed   barley grain, feed   Cutoff, U - GLO | barley grain, feed production   barley grain, feed   Cutoff, U - RoW | Link to new provider and energy mix update. |

|                                                           |                                                                                                                      |                                                                                                                        |                                             |
|-----------------------------------------------------------|----------------------------------------------------------------------------------------------------------------------|------------------------------------------------------------------------------------------------------------------------|---------------------------------------------|
| electricity, low voltage                                  | Mix from various locations.                                                                                          | market group for electricity, low voltage   electricity, low voltage   Cutoff, U - BR                                  | Link to a new provider.                     |
| limestone, crushed, washed                                | market for limestone, crushed, washed   limestone, crushed, washed   Cutoff, U - CH                                  | limestone production, crushed, washed   limestone, crushed, washed   Cutoff, U - RoW                                   | Link to new provider and energy mix update. |
| Maize grain, feed                                         | market for maize grain, feed   maize grain, feed   Cutoff, U - RoW                                                   | maize grain, feed production   maize grain, feed   Cutoff, U - RoW                                                     | Link to new provider and energy mix update. |
| Maize silage                                              | market for maize silage   maize silage   Cutoff, U - RoW                                                             | market for maize silage   maize silage   Cutoff, U - BR                                                                | Link to a new provider.                     |
| Oat grain                                                 | market for oat grain   oat grain   Cutoff, U - GLO                                                                   | oat production   oat grain   Cutoff, U - RoW                                                                           | Link to new provider and energy mix update. |
| operation, housing system, cattle, loose, per animal unit | market for operation, housing system, cattle, loose, per animal unit   operation, housing system, cattle, loose, per | operation, housing system, cattle, loose   operation, housing system, cattle, loose, per animal unit   Cutoff, U - RoW | Link to new provider and energy mix update. |



|                                                          |                                                                                                                                                  |                                                                                                                      |                                             |
|----------------------------------------------------------|--------------------------------------------------------------------------------------------------------------------------------------------------|----------------------------------------------------------------------------------------------------------------------|---------------------------------------------|
|                                                          | animal unit  <br>Cutoff, U - GLO                                                                                                                 |                                                                                                                      |                                             |
| operation, housing system, cattle, tied, per animal unit | market for operation, housing system, cattle, tied, per animal unit   operation, housing system, cattle, tied, per animal unit   Cutoff, U - GLO | operation, housing system, cattle, tied   operation, housing system, cattle, tied, per animal unit   Cutoff, U - RoW | Link to new provider and energy mix update. |
| Rape meal                                                | market for rape meal   rape meal   Cutoff, U - GLO                                                                                               | rape oil mill operation   rape meal   Cutoff, U - RoW                                                                | Link to new provider and energy mix update. |
| sodium chloride, powder                                  | market for sodium chloride, powder   sodium chloride, powder   Cutoff, U - GLO                                                                   | sodium chloride production, powder   sodium chloride, powder   Cutoff, U - RoW                                       | Link to new provider and energy mix update. |
| Soybean, feed                                            | market for soybean, feed   soybean, feed   Cutoff, U - GLO                                                                                       | soybean, feed production   soybean, feed   Cutoff, U - RoW                                                           | Link to new provider and energy mix update. |
| straw                                                    | market for straw   straw   Cutoff, U - RER                                                                                                       | market for straw   straw   Cutoff, U - RoW                                                                           | Link to a new provider.                     |

|                                        |                                                                                                            |                                                                                                                    |                                                                                            |
|----------------------------------------|------------------------------------------------------------------------------------------------------------|--------------------------------------------------------------------------------------------------------------------|--------------------------------------------------------------------------------------------|
| wood chips, dry, measured as dry mass  | market for wood chips, dry, measured as dry mass   wood chips, dry, measured as dry mass   Cutoff, U - RER | market for wood chips, dry, measured as dry mass   wood chips, dry, measured as dry mass   Cutoff, U - RoW         | Link to a new provider.                                                                    |
| transport, freight, lorry, unspecified | -                                                                                                          | market group for transport, freight, lorry, unspecified   transport, freight, lorry, unspecified   Cutoff, U - GLO | New flow. Amount data from process <i>market for cow milk / cow milk / Cutoff, U - GLO</i> |

**butter production, from cream, from cow milk | skimmed milk, from cow milk | Cutoff, U – GLO**

| Flow                        | Original provider                                                        | Modified provider                                                         | Adaptation                                  |
|-----------------------------|--------------------------------------------------------------------------|---------------------------------------------------------------------------|---------------------------------------------|
| cream, from cow milk        | market for cream, from cow milk   cream, from cow milk   Cutoff, U - GLO | yogurt production, from cow milk   cream, from cow milk   Cutoff, U - RoW | Link to new provider and energy mix update. |
| dairy                       | market for dairy   dairy   Cutoff, U - GLO                               | dairy construction   dairy   Cutoff, U - GLO                              | Link to new provider and energy mix update. |
| electricity, medium voltage | market group for electricity, medium voltage   electricity,              | market group for electricity, medium voltage   electricity,               | Link to a new provider.                     |

|                                                         |                                                                                                                                                      |                                                                                                                                                      |                            |
|---------------------------------------------------------|------------------------------------------------------------------------------------------------------------------------------------------------------|------------------------------------------------------------------------------------------------------------------------------------------------------|----------------------------|
|                                                         | medium voltage  <br>Cutoff, U - GLO                                                                                                                  | medium voltage  <br>Cutoff, U - BR                                                                                                                   |                            |
| nitric acid, without<br>water, in 50%<br>solution state | market for nitric<br>acid, without water,<br>in 50% solution<br>state   nitric acid,<br>without water, in<br>50% solution state  <br>Cutoff, U - RER | market for nitric<br>acid, without water,<br>in 50% solution<br>state   nitric acid,<br>without water, in<br>50% solution state  <br>Cutoff, U - RoW | Link to a new<br>provider. |
| Tap water                                               | market group for<br>tap water   tap<br>water   Cutoff, U -<br>GLO                                                                                    | market for tap<br>water   tap water  <br>Cutoff, U - BR                                                                                              | Link to a new<br>provider. |

**cheese production, soft, from cow milk | cheese, from cow milk, fresh, unripened |  
Cutoff, U – GLO**

| <b>Flow</b>             | <b>Original provider</b>                                                             | <b>Modified provider</b>                                                              | <b>Adaptation</b>                                 |
|-------------------------|--------------------------------------------------------------------------------------|---------------------------------------------------------------------------------------|---------------------------------------------------|
| Cow milk                | market for cow milk<br>  cow milk   Cutoff,<br>U - GLO                               | milk production,<br>from cow   cow<br>milk   Cutoff, U -<br>RoW                       | Provider energy mix<br>updated.                   |
| cream, from cow<br>milk | market for cream,<br>from cow milk  <br>cream, from cow<br>milk   Cutoff, U -<br>GLO | yogurt production,<br>from cow milk  <br>cream, from cow<br>milk   Cutoff, U -<br>RoW | Link to a new<br>provider. Energy<br>mix updated. |

|                                                   |                                                                                                                                    |                                                                                                                                    |                                                                                                                                                          |
|---------------------------------------------------|------------------------------------------------------------------------------------------------------------------------------------|------------------------------------------------------------------------------------------------------------------------------------|----------------------------------------------------------------------------------------------------------------------------------------------------------|
| dairy                                             | market for dairy   dairy   Cutoff, U - GLO                                                                                         | dairy construction   dairy   Cutoff, U - GLO                                                                                       | Link to new provider and energy mix update.                                                                                                              |
| electricity, medium voltage                       | market group for electricity, medium voltage   electricity, medium voltage   Cutoff, U - GLO                                       | market group for electricity, medium voltage   electricity, medium voltage   Cutoff, U - BR                                        | Link to a new provider.                                                                                                                                  |
| nitric acid, without water, in 50% solution state | market for nitric acid, without water, in 50% solution state   nitric acid, without water, in 50% solution state   Cutoff, U - RER | market for nitric acid, without water, in 50% solution state   nitric acid, without water, in 50% solution state   Cutoff, U - RoW | Link to a new provider.                                                                                                                                  |
| Tap water                                         | market group for tap water   tap water   Cutoff, U - GLO                                                                           | market for tap water   tap water   Cutoff, U - BR                                                                                  | Link to a new provider.                                                                                                                                  |
| transport, freight, lorry, unspecified            | -                                                                                                                                  | market group for transport, freight, lorry, unspecified   transport, freight, lorry, unspecified   Cutoff, U - GLO                 | New flow. Amount data from process <i>market for cheese, from cow milk, fresh, unripened   cheese, from cow milk, fresh, unripened   Cutoff, U - GLO</i> |

**yogurt production, from cow milk | cream, from cow milk | Cutoff, U – RoW**

| <b>Flow</b>                                             | <b>Original provider</b>                                                                                                                             | <b>Modified provider</b>                                                                                                                             | <b>Adaptation</b>               |
|---------------------------------------------------------|------------------------------------------------------------------------------------------------------------------------------------------------------|------------------------------------------------------------------------------------------------------------------------------------------------------|---------------------------------|
| Cow milk                                                | market for cow milk<br>  cow milk   Cutoff,<br>U - GLO                                                                                               | milk production,<br>from cow   cow<br>milk   Cutoff, U -<br>RoW                                                                                      | Provider energy mix<br>updated. |
| electricity, medium<br>voltage                          | Mix from various<br>locations.                                                                                                                       | market group for<br>electricity, medium<br>voltage   electricity,<br>medium voltage  <br>Cutoff, U - BR                                              | Link to a new<br>provider.      |
| heat, district or<br>industrial, natural<br>gas         | market group for<br>heat, district or<br>industrial, natural<br>gas   heat, district<br>or industrial,<br>natural gas   Cutoff,<br>U - RER           | market for heat,<br>district or industrial,<br>natural gas   heat,<br>district or industrial,<br>natural gas   Cutoff,<br>U - RoW                    | Link to a new<br>provider.      |
| nitric acid, without<br>water, in 50%<br>solution state | market for nitric<br>acid, without water,<br>in 50% solution<br>state   nitric acid,<br>without water, in<br>50% solution state  <br>Cutoff, U - RER | market for nitric<br>acid, without water,<br>in 50% solution<br>state   nitric acid,<br>without water, in<br>50% solution state  <br>Cutoff, U - RoW | Link to a new<br>provider.      |
| sugar, from<br>sugarcane                                | market for sugar,<br>from sugarcane  <br>sugar, from                                                                                                 | sugarcane<br>processing, modern<br>annexed plant  <br>sugar, from                                                                                    | Link to a new<br>provider.      |

|                  |                                                                                                                                                                                     |                                                                           |                                                   |
|------------------|-------------------------------------------------------------------------------------------------------------------------------------------------------------------------------------|---------------------------------------------------------------------------|---------------------------------------------------|
|                  | sugarcane   Cutoff,<br>U - GLO                                                                                                                                                      | sugarcane   Cutoff,<br>U - BR                                             |                                                   |
| Tap water        | market group for<br>tap water   tap<br>water   Cutoff, U -<br>GLO                                                                                                                   | market for tap<br>water   tap water  <br>Cutoff, U - BR                   | Link to a new<br>provider.                        |
| water, deionised | market for water,<br>deionised   water,<br>deionised   Cutoff,<br>U - Europe without<br>Switzerland<br><br>market for water,<br>deionised   water,<br>deionised   Cutoff,<br>U - CH | market for water,<br>deionised   water,<br>deionised   Cutoff,<br>U - RoW | Link to a new<br>provider.                        |
| Wheat grain      | market for wheat<br>grain   wheat grain<br>  Cutoff, U - ZA                                                                                                                         | market for wheat<br>grain   wheat grain<br>  Cutoff, U - RoW              | Link to a new<br>provider.                        |
| whey             | market for whey  <br>whey   Cutoff, U -<br>GLO                                                                                                                                      | tofu production  <br>whey   Cutoff, U -<br>RoW                            | Link to a new<br>provider. Energy<br>mix updated. |

**yogurt production, from cow milk | yogurt, from cow milk | Cutoff, U – RoW**

| Flow | Original provider | Modified provider | Adaptation |
|------|-------------------|-------------------|------------|
|------|-------------------|-------------------|------------|

|                                                         |                                                                                                                                                |                                                                                                                                                |                              |
|---------------------------------------------------------|------------------------------------------------------------------------------------------------------------------------------------------------|------------------------------------------------------------------------------------------------------------------------------------------------|------------------------------|
| ammonia, liquid                                         | market for ammonia, liquid   ammonia, liquid   Cutoff, U - RER                                                                                 | market for ammonia, liquid   ammonia, liquid   Cutoff, U - RoW                                                                                 | Link to a new provider.      |
| Cow milk                                                | market for cow milk   cow milk   Cutoff, U - GLO                                                                                               | milk production, from cow   cow milk   Cutoff, U - RoW                                                                                         | Provider energy mix updated. |
| electricity, medium voltage                             | Mix from various locations.                                                                                                                    | market group for electricity, medium voltage   electricity, medium voltage   Cutoff, U - BR                                                    | Link to a new provider.      |
| heat, district or industrial, natural gas               | market group for heat, district or industrial, natural gas   heat, district or industrial, natural gas   Cutoff, U - RER                       | market for heat, district or industrial, natural gas   heat, district or industrial, natural gas   Cutoff, U - RoW                             | Link to a new provider.      |
| hydrogen peroxide, without water, in 50% solution state | market for hydrogen peroxide, without water, in 50% solution state   hydrogen peroxide, without water, in 50% solution state   Cutoff, U - RER | market for hydrogen peroxide, without water, in 50% solution state   hydrogen peroxide, without water, in 50% solution state   Cutoff, U - RoW | Link to a new provider.      |

|                                                           |                                                                                                                                                    |                                                                                                                                                    |                         |
|-----------------------------------------------------------|----------------------------------------------------------------------------------------------------------------------------------------------------|----------------------------------------------------------------------------------------------------------------------------------------------------|-------------------------|
| nitric acid, without water, in 50% solution state         | market for nitric acid, without water, in 50% solution state   nitric acid, without water, in 50% solution state   Cutoff, U - RER                 | market for nitric acid, without water, in 50% solution state   nitric acid, without water, in 50% solution state   Cutoff, U - RoW                 | Link to a new provider. |
| propylene glycol, liquid                                  | market for propylene glycol, liquid   propylene glycol, liquid   Cutoff, U - RER                                                                   | market for propylene glycol, liquid   propylene glycol, liquid   Cutoff, U - RoW                                                                   | Link to a new provider. |
| sodium hypochlorite, without water, in 15% solution state | market for sodium hypochlorite, without water, in 15% solution state   sodium hypochlorite, without water, in 15% solution state   Cutoff, U - RER | market for sodium hypochlorite, without water, in 15% solution state   sodium hypochlorite, without water, in 15% solution state   Cutoff, U - RoW | Link to a new provider. |
| sugar, from sugarcane                                     | market for sugar, from sugarcane   sugar, from sugarcane   Cutoff, U - GLO                                                                         | sugarcane processing, modern annexed plant   sugar, from sugarcane   Cutoff, U - BR                                                                | Link to a new provider. |



|                                        |                                                                                                                                                                |                                                                                                                    |                                                                                                                    |
|----------------------------------------|----------------------------------------------------------------------------------------------------------------------------------------------------------------|--------------------------------------------------------------------------------------------------------------------|--------------------------------------------------------------------------------------------------------------------|
| Tap water                              | market group for tap water   tap water   Cutoff, U - GLO                                                                                                       | market for tap water   tap water   Cutoff, U - BR                                                                  | Link to a new provider.                                                                                            |
| transport, freight, lorry, unspecified | -                                                                                                                                                              | market group for transport, freight, lorry, unspecified   transport, freight, lorry, unspecified   Cutoff, U - GLO | New flow. Amount data from process <i>market for yogurt, from cow milk   yogurt, from cow milk   Cutoff, U-GLO</i> |
| water, deionised                       | market for water, deionised   water, deionised   Cutoff, U - Europe without Switzerland<br><br>market for water, deionised   water, deionised   Cutoff, U - CH | market for water, deionised   water, deionised   Cutoff, U - RoW                                                   | Link to a new provider.                                                                                            |
| Wheat grain                            | market for wheat grain   wheat grain   Cutoff, U - ZA                                                                                                          | market for wheat grain   wheat grain   Cutoff, U - RoW                                                             | Link to a new provider.                                                                                            |
| whey                                   | market for whey   whey   Cutoff, U - GLO                                                                                                                       | tofu production   whey   Cutoff, U - RoW                                                                           | Link to a new provider. Energy mix updated.                                                                        |

**butter production, from cow milk | buttermilk, from cow milk | Cutoff, U – GLO**

| <b>Flow</b>                                       | <b>Original provider</b>                                                                                                           | <b>Modified provider</b>                                                                                                           | <b>Adaptation</b>                           |
|---------------------------------------------------|------------------------------------------------------------------------------------------------------------------------------------|------------------------------------------------------------------------------------------------------------------------------------|---------------------------------------------|
| Cow milk                                          | market for cow milk   cow milk   Cutoff, U - GLO                                                                                   | milk production, from cow   cow milk   Cutoff, U - RoW                                                                             | Provider energy mix updated.                |
| dairy                                             | market for dairy   dairy   Cutoff, U - GLO                                                                                         | dairy construction   dairy   Cutoff, U - GLO                                                                                       | Link to new provider and energy mix update. |
| electricity, medium voltage                       | market group for electricity, medium voltage   electricity, medium voltage   Cutoff, U - GLO                                       | market group for electricity, medium voltage   electricity, medium voltage   Cutoff, U - BR                                        | Link to a new provider.                     |
| nitric acid, without water, in 50% solution state | market for nitric acid, without water, in 50% solution state   nitric acid, without water, in 50% solution state   Cutoff, U - RER | market for nitric acid, without water, in 50% solution state   nitric acid, without water, in 50% solution state   Cutoff, U - RoW | Link to a new provider.                     |
| Tap water                                         | market group for tap water   tap water   Cutoff, U - GLO                                                                           | market for tap water   tap water   Cutoff, U - BR                                                                                  | Link to a new provider.                     |

**butter production, from cow milk | butter, from cow milk | Cutoff, U – GLO**

| Flow                                              | Original provider                                                                                                                  | Modified provider                                                                                                                  | Adaptation                                                                                    |
|---------------------------------------------------|------------------------------------------------------------------------------------------------------------------------------------|------------------------------------------------------------------------------------------------------------------------------------|-----------------------------------------------------------------------------------------------|
| Cow milk                                          | market for cow milk<br>  cow milk   Cutoff, U - GLO                                                                                | milk production,<br>from cow   cow milk   Cutoff, U - RoW                                                                          | Provider energy mix updated.                                                                  |
| dairy                                             | market for dairy   dairy   Cutoff, U - GLO                                                                                         | dairy construction   dairy   Cutoff, U - GLO                                                                                       | Link to new provider and energy mix update.                                                   |
| electricity, medium voltage                       | market group for electricity, medium voltage   electricity, medium voltage   Cutoff, U - GLO                                       | market group for electricity, medium voltage   electricity, medium voltage   Cutoff, U - BR                                        | Link to a new provider.                                                                       |
| nitric acid, without water, in 50% solution state | market for nitric acid, without water, in 50% solution state   nitric acid, without water, in 50% solution state   Cutoff, U - RER | market for nitric acid, without water, in 50% solution state   nitric acid, without water, in 50% solution state   Cutoff, U - RoW | Link to a new provider.                                                                       |
| Tap water                                         | market group for tap water   tap water   Cutoff, U - GLO                                                                           | market for tap water   tap water   Cutoff, U - BR                                                                                  | Link to a new provider.                                                                       |
| transport, freight, lorry, unspecified            | -                                                                                                                                  | market group for transport, freight, lorry, unspecified   transport, freight,                                                      | New flow. Amount data from process <i>market for butter, from cow milk   butter, from cow</i> |

|  |  |                                         |                                   |
|--|--|-----------------------------------------|-----------------------------------|
|  |  | lorry, unspecified  <br>Cutoff, U - GLO | <i>milk / Cutoff, U -<br/>GLO</i> |
|--|--|-----------------------------------------|-----------------------------------|

## Óleos e gorduras

### coconut oil production, crude | coconut oil, crude | Cutoff, U – RoW

| Flow                                                       | Original provider                                                                                                    | Modified provider                                                                                                                                          | Adaptation                                        |
|------------------------------------------------------------|----------------------------------------------------------------------------------------------------------------------|------------------------------------------------------------------------------------------------------------------------------------------------------------|---------------------------------------------------|
| coconut, dehusked                                          | market for coconut,<br>dehusked  <br>coconut, dehusked<br>  Cutoff, U - GLO                                          | coconut production,<br>dehusked  <br>coconut, dehusked<br>  Cutoff, U - RoW                                                                                | Provider energy mix<br>updated.                   |
| dairy                                                      | market for dairy  <br>dairy   Cutoff, U -<br>GLO                                                                     | dairy construction  <br>dairy   Cutoff, U -<br>GLO                                                                                                         | Link to new<br>provider and energy<br>mix update. |
| electricity, medium<br>voltage                             | Mix from various<br>locations.                                                                                       | market group for<br>electricity, medium<br>voltage   electricity,<br>medium voltage  <br>Cutoff, U - BR                                                    | Link to a new<br>provider.                        |
| heat, district or<br>industrial, other<br>than natural gas | market for heat,<br>district or<br>industrial, other<br>than natural gas  <br>heat, district or<br>industrial, other | market for heat,<br>district or industrial,<br>other than natural<br>gas   heat, district<br>or industrial, other<br>than natural gas  <br>Cutoff, U - RoW | Link to a new<br>provider.                        |

|  |                                                                                                                                                                                                                                   |  |  |
|--|-----------------------------------------------------------------------------------------------------------------------------------------------------------------------------------------------------------------------------------|--|--|
|  | <p>than natural gas  <br/>Cutoff, U - CA-QC</p> <p>market group for<br/>heat, district or<br/>industrial, other<br/>than natural gas  <br/>heat, district or<br/>industrial, other<br/>than natural gas  <br/>Cutoff, U - RER</p> |  |  |
|--|-----------------------------------------------------------------------------------------------------------------------------------------------------------------------------------------------------------------------------------|--|--|

**olive production | olive | Cutoff, U – RoW**

| <b>Flow</b>                                               | <b>Original provider</b>                                                                                                                                                      | <b>Modified provider</b>                                                                                                                                      | <b>Adaptation</b>       |
|-----------------------------------------------------------|-------------------------------------------------------------------------------------------------------------------------------------------------------------------------------|---------------------------------------------------------------------------------------------------------------------------------------------------------------|-------------------------|
| Application of plant protection product, by field sprayer | <p>market for<br/>application of plant protection product,<br/>by field sprayer  <br/>application of plant protection product,<br/>by field sprayer  <br/>Cutoff, U - GLO</p> | <p>application of plant protection product,<br/>by field sprayer  <br/>application of plant protection product,<br/>by field sprayer  <br/>Cutoff, U - BR</p> | Link to a new provider. |
| Fertilising, by broadcaster                               | <p>Market for<br/>fertilising, by broadcaster  <br/>fertilising, by broadcaster  <br/>Cutoff, U - GLO</p>                                                                     | <p>fertilising, by broadcaster  <br/>fertilising, by broadcaster  <br/>Cutoff, U - BR</p>                                                                     | Link to a new provider. |

|                                                |                             |                                                                                                                              |                                                                                      |
|------------------------------------------------|-----------------------------|------------------------------------------------------------------------------------------------------------------------------|--------------------------------------------------------------------------------------|
| Irrigation                                     | Mix from various locations. | market for irrigation   irrigation   Cutoff, U - BR                                                                          | Link to a new provider.                                                              |
| operation, reefer, cooling                     | -                           | market for operation, reefer, cooling   operation, reefer, cooling   Cutoff, U - GLO                                         | New flow. Amount data from process <i>market for olive / olive / Cutoff, U - GLO</i> |
| transport, freight, lorry with reefer, cooling | -                           | market for transport, freight, lorry with reefer, cooling   transport, freight, lorry with reefer, cooling   Cutoff, U - GLO | New flow. Amount data from process <i>market for olive / olive / Cutoff, U - GLO</i> |

## Beverages

**tap water production, conventional treatment | tap water | Cutoff, U – BR**

| Flow                 | Original provider | Modified provider                                                          | Adaptation                                                                                   |
|----------------------|-------------------|----------------------------------------------------------------------------|----------------------------------------------------------------------------------------------|
| water supply network | -                 | water supply network construction   water supply network   Cutoff, U - RoW | New flow. Amount data from process <i>market for tap water / tap water / Cutoff, U - GLO</i> |

soybean beverage production | soybean beverage | Cutoff, U – RoW

| Flow                                   | Original provider                                                                      | Modified provider                                                                                                  | Adaptation                                                                                                 |
|----------------------------------------|----------------------------------------------------------------------------------------|--------------------------------------------------------------------------------------------------------------------|------------------------------------------------------------------------------------------------------------|
| electricity, medium voltage            | Mix from various locations.                                                            | market group for electricity, medium voltage   electricity, medium voltage   Cutoff, U - BR                        | Link to a new provider.                                                                                    |
| soybean, organic                       | market for soybean, organic   soybean, organic   Cutoff, U - GLO                       | market for soybean   soybean   Cutoff, U - BR                                                                      | Flow substituído por <i>soybean</i> .<br>Provider não foi modificado.                                      |
| steam, in chemical industry            | market for steam, in chemical industry   steam, in chemical industry   Cutoff, U - RER | market for steam, in chemical industry   steam, in chemical industry   Cutoff, U - RoW                             | Link to a new provider.                                                                                    |
| tap water                              | Mix from various locations.                                                            | market for tap water   tap water   Cutoff, U - BR                                                                  | New flow. Amount data from process <i>market for olive / olive   Cutoff, U - GLO</i>                       |
| transport, freight, lorry, unspecified | -                                                                                      | market group for transport, freight, lorry, unspecified   transport, freight, lorry, unspecified   Cutoff, U - GLO | New flow. Amount data from process <i>market for soybean beverage / soybean beverage   Cutoff, U - GLO</i> |

**tea production, dried | tea, dried | Cutoff, U – RoW**

| <b>Flow</b>                                               | <b>Original provider</b>                                                                                                                           | <b>Modified provider</b>                                                                                                               | <b>Adaptation</b>       |
|-----------------------------------------------------------|----------------------------------------------------------------------------------------------------------------------------------------------------|----------------------------------------------------------------------------------------------------------------------------------------|-------------------------|
| Application of plant protection product, by field sprayer | market for application of plant protection product, by field sprayer   application of plant protection product, by field sprayer   Cutoff, U - GLO | application of plant protection product, by field sprayer   application of plant protection product, by field sprayer   Cutoff, U - BR | Link to a new provider. |
| Fertilising, by broadcaster                               | Market for fertilising, by broadcaster   fertilising, by broadcaster   Cutoff, U - GLO                                                             | fertilising, by broadcaster   fertilising, by broadcaster   Cutoff, U - BR                                                             | Link to a new provider. |
| Irrigation                                                | Mix from various locations.                                                                                                                        | market for irrigation   irrigation   Cutoff, U - BR                                                                                    | Link to a new provider. |
| transport, tractor and trailer, agricultural              | market for transport, tractor and trailer, agricultural   transport, tractor and trailer, agricultural   Cutoff, U - CH                            | market for transport, tractor and trailer, agricultural   transport, tractor and trailer, agricultural   Cutoff, U - RoW               | Link to a new provider. |



|                                        |   |                                                                                                                    |                                                                                                |
|----------------------------------------|---|--------------------------------------------------------------------------------------------------------------------|------------------------------------------------------------------------------------------------|
| transport, freight, lorry, unspecified | - | market group for transport, freight, lorry, unspecified   transport, freight, lorry, unspecified   Cutoff, U - GLO | New flow. Amount data from process <i>market for tea, dried   tea, dried   Cutoff, U - GLO</i> |
|----------------------------------------|---|--------------------------------------------------------------------------------------------------------------------|------------------------------------------------------------------------------------------------|

**barley production | barley grain | Cutoff, U – RoW**

| Flow                                                      | Original provider                                                                                                                                  | Modified provider                                                                                                                      | Adaptation              |
|-----------------------------------------------------------|----------------------------------------------------------------------------------------------------------------------------------------------------|----------------------------------------------------------------------------------------------------------------------------------------|-------------------------|
| Application of plant protection product, by field sprayer | market for application of plant protection product, by field sprayer   application of plant protection product, by field sprayer   Cutoff, U - GLO | application of plant protection product, by field sprayer   application of plant protection product, by field sprayer   Cutoff, U - BR | Link to a new provider. |
| Combine harvesting                                        | market for combine harvesting   combine harvesting   Cutoff, U - GLO                                                                               | combine harvesting   combine harvesting   Cutoff, U - BR                                                                               | Link to a new provider. |
| Fertilising, by broadcaster                               | Market for fertilising, by broadcaster   fertilising, by broadcaster   Cutoff, U - GLO                                                             | fertilising, by broadcaster   fertilising, by broadcaster   Cutoff, U - BR                                                             | Link to a new provider. |

|                                              |                                                                                                                         |                                                                                                                          |                                                                                                    |
|----------------------------------------------|-------------------------------------------------------------------------------------------------------------------------|--------------------------------------------------------------------------------------------------------------------------|----------------------------------------------------------------------------------------------------|
| Irrigation                                   | Mix from various locations.                                                                                             | market for irrigation   irrigation   Cutoff, U - BR                                                                      | Link to a new provider.                                                                            |
| Lime                                         | market for lime   lime   Cutoff, U - RoW                                                                                | lime production, milled, loose   lime   Cutoff, U - RoW                                                                  | Link to new provider and energy mix update.                                                        |
| transport, tractor and trailer, agricultural | market for transport, tractor and trailer, agricultural   transport, tractor and trailer, agricultural   Cutoff, U - CH | market for transport, tractor and trailer, agricultural   transport, tractor and trailer, agricultural   Cutoff, U - RoW | Link to a new provider.                                                                            |
| transport, freight, lorry, unspecified       | -                                                                                                                       | market group for transport, freight, lorry, unspecified   transport, freight, lorry, unspecified   Cutoff, U - GLO       | New flow. Amount data from process <i>market for barley grain   barley grain / Cutoff, U - GLO</i> |

**coffee green bean production, arabica | coffee, green bean | Cutoff, U – BR**

| Flow | Original provider                        | Modified provider                                       | Adaptation                                  |
|------|------------------------------------------|---------------------------------------------------------|---------------------------------------------|
| Lime | market for lime   lime   Cutoff, U - RoW | lime production, milled, loose   lime   Cutoff, U - RoW | Link to new provider and energy mix update. |

|                                        |   |                                                                                                                    |                                                                                                                |
|----------------------------------------|---|--------------------------------------------------------------------------------------------------------------------|----------------------------------------------------------------------------------------------------------------|
| operation, reefer, cooling             | - | market for operation, reefer, cooling   operation, reefer, cooling   Cutoff, U - GLO                               | New flow. Amount data from process <i>market for coffee, green bean   coffee, green bean   Cutoff, U - GLO</i> |
| transport, freight, lorry, unspecified | - | market group for transport, freight, lorry, unspecified   transport, freight, lorry, unspecified   Cutoff, U - GLO | New flow. Amount data from process <i>market for coffee, green bean   coffee, green bean   Cutoff, U - GLO</i> |

## Doces

sugarcane processing, traditional annexed plant | sugar, from sugarcane | Cutoff, U – BR

| Flow                                   | Original provider | Modified provider                                                                                                  | Adaptation                                                                                                           |
|----------------------------------------|-------------------|--------------------------------------------------------------------------------------------------------------------|----------------------------------------------------------------------------------------------------------------------|
| transport, freight, lorry, unspecified | -                 | market group for transport, freight, lorry, unspecified   transport, freight, lorry, unspecified   Cutoff, U - GLO | New flow. Amount data from process <i>market for sugar, from sugarcane   sugar, from sugarcane   Cutoff, U - GLO</i> |

## **F. Adaptations from Agribalyse 3.0.1 to Ecoinvent 3.6 Cutoff**

### **Egg, conventional, indoor production, cage 2012 rules**

*Description:* Included processes: The inventory includes: all activities of a poultry farm, that is (1) all inputs as livestock (young animal), feeds, water (watering and cleaning), fuels and energy used for the hatchery as well as the transport to the farm; (2) the buildings and barns (3) emissions due to the effluent management.

The temporal border of the inventory is 'one year of production'.

Cut-off rule, exclusion: The inventory does not include vet products and cares, artificial insemination process, small cleaning material and all processes occurring outside of the farm (slaughtering, processing, conservation etc.).

Refers to 1 kg of egg or 1 kg (live weight) of cull hen.

Allocation: Allocation to the coproducts egg and cull hen has been performed using the biophysical allocation approach. Eggs: 100% of the laying hens stage. Cull hens: 100% of the future reproductive, reproductive and young hens stages.

Remark: AGRIBALYSE V1.4, Mai 2020

Coproducts: 634278.912 kg Egg, 31666.0 Cull hen (weight 1,88 kg)

ILCD – Overall data quality:

Technological representativeness (TeR) = 2: Good

Geographical representativeness (GR) = 2: Good

Time-related representativeness (TiR) = 1: Very good

Completeness (C) = 2: Good

Precision / uncertainty (P) = 2: Good

Methodological appropriateness and consistency (M) = 2: Good

Final note = 1,9: Basic quality

All background data originates either from Ecoinvent 3.6, INRA or AGRIBALYSE.

Dataset was generated by MEANS-InOut software. Models used: [N2O - IPCC 2006, tier 2; NO - EMEP/EEA, 2016 - Tier 1; N - ITAVI 2013; CH4 - IPCC 2006b; NO3 - Basset-Mens 2007; NH3 - EMEP 2009, tier 2;]

Technology: Conventional production - production mode: Integrated egg production, indoor cage system (2012 rules).

Time period: Inventory data based on the period: 2005-2009

Version: 0.0

Energy values: Net values

Source file: Egg - Conventional - \_MEANS#1424-Ecoinvent v3.4.xml

Boundary with nature: Unspecified

Record: Data entry by: Ponchant Paul; Telephone: 00 33 2 96 70 00 05; Company: ITAVI; Country: FR; Salou Thibault; Company: INRA; Country: FR

Generator: Generator/publisher: MEANS-Team - E-mail: means-contact@inra.fr; Company: INRA; Country: FR

#### Inputs

| Flow<br>3.0.1                                                                                    | Agribalyse | Flow<br>Ecoinvent<br>3.6 Cutoff U | Provider                                                                                                      | Amount      | Unit | Description                |
|--------------------------------------------------------------------------------------------------|------------|-----------------------------------|---------------------------------------------------------------------------------------------------------------|-------------|------|----------------------------|
| Electricity, low<br>voltage {FR}   market<br>for   Cut-off, S -<br>Copied from<br>Ecoinvent - FR |            | electricity,<br>low voltage       | market<br>group for<br>electricity,<br>low voltage<br> <br>electricity,<br>low voltage<br>  Cutoff, U -<br>BR | 0.223188884 | kWh  | Energy needed in building. |

|                                                                                                                                                                                  |                                                      |                                                                                                                                           |             |      |                                |
|----------------------------------------------------------------------------------------------------------------------------------------------------------------------------------|------------------------------------------------------|-------------------------------------------------------------------------------------------------------------------------------------------|-------------|------|--------------------------------|
| Heat, central or small-scale, other than natural gas {CH}  heat production, light fuel oil, at boiler 100kW condensing, non-modulating   Cut-off, S - Copied from Ecoinvent - CH | heat, central or small-scale, other than natural gas | heat production, light fuel oil, at boiler 100kW, non-modulating   heat, central or small-scale, other than natural gas   Cutoff, U - RoW | 0.052131256 | MJ   | Energy needed in building.     |
| Laying hen, laying hen feed, conv prod, at farm gate/FR U                                                                                                                        | maize grain, feed                                    | maize grain feed production   maize grain, feed   Cutoff, U - BR. Created process. Check the next tab.                                    | 2.273657535 | kg   | Compound feedstuff             |
| One-side mechanical ventilation, steel siding and fibre cement roofing/FR U                                                                                                      | Occupation, industrial area                          | -                                                                                                                                         | 0.001734253 | m2*a | Room required per animal : 0.0 |
| Tap water {Europe without Switzerland}   market for   Cut-off, S - Copied from Ecoinvent                                                                                         | tap water                                            | market for tap water   tap water   Cutoff, U - BR                                                                                         | 3.954187976 | kg   | Water for drinking.            |

|                                                                                         |           |                                                   |             |    |                     |
|-----------------------------------------------------------------------------------------|-----------|---------------------------------------------------|-------------|----|---------------------|
| Tap water {Europe without Switzerland}  market for   Cut-off, S - Copied from Ecoinvent | tap water | market for tap water   tap water   Cutoff, U - BR | 0.283414757 | kg | Water for cleaning. |
|-----------------------------------------------------------------------------------------|-----------|---------------------------------------------------|-------------|----|---------------------|

#### Outputs

| Flow<br>3.0.1       | Agribalyse | Flow<br>Ecoinvent<br>3.6 Cutoff U | Provider | Amount      | Unit | Description                                                                                                                                        |
|---------------------|------------|-----------------------------------|----------|-------------|------|----------------------------------------------------------------------------------------------------------------------------------------------------|
| Ammonia             |            | Ammonia                           | -        | 0.002702935 | kg   | NH3 solid stock, null. Model used : NH3 - EMEP 2009, tier 2, Pedigree Matrix = (2,3,2,2,1,na)                                                      |
| Ammonia             |            | Ammonia                           | -        | 0.013416504 | kg   | NH3 Solid Building, Emissions due to excretion, in building . Model used : NH3 - EMEP 2009, tier 2, Pedigree Matrix = (2,3,2,2,1,na)               |
| Dinitrogen monoxide |            | Dinitrogen monoxide               | -        | 0.000215671 | kg   | N2O excrement Stock solid, Direct N2O emissions due to the storage of liquid excrements.. Model used : N2O - IPCC 2006, tier 2, Pedigree Matrix =  |
| Dinitrogen monoxide |            | Dinitrogen monoxide               | -        | 0.000210591 | kg   | Indirect N2O, Indirect N2O emissions due to storage of excrements, and leaching in yards.. Model used : N2O - IPCC 2006, tier 2, Pedigree Matrix = |

|                                                                                 |                            |   |             |    |                                                                                                                                                                                                              |
|---------------------------------------------------------------------------------|----------------------------|---|-------------|----|--------------------------------------------------------------------------------------------------------------------------------------------------------------------------------------------------------------|
| <i>Egg, conventional, indoor production, cage 2012 rules, at farm gate/FR U</i> | <i>Eggs (created flow)</i> | - | 1           | kg |                                                                                                                                                                                                              |
| Methane, biogenic                                                               | Methane, biogenic          | - | 0.001392216 | kg | Building and stockage feces CH <sub>4</sub> , Emissions of CH <sub>4</sub> in the building and during the storage of excrements. Model used : CH <sub>4</sub> - IPCC 2006b, Pedigree Matrix = (2,2,3,3,1,na) |
| Nitrogen oxides                                                                 | Nitrogen oxides            | - | 0.000270835 | kg | NO feces and housing, Emissions in the building and during storage. Model used : NO - EMEP/EEA, 2016 - Tier 1, Pedigree Matrix = (3,4,2,2,1,na)                                                              |

**Maize grain, feed production, organic | maize grain, feed, organic | Cutoff, U (adapted from Ecoinvent 3.6)**

Process created: maize grain feed production | maize grain, feed | Cutoff, U

Inputs

| Flow                     | Amount     | Unit           | Provider                                                                               |
|--------------------------|------------|----------------|----------------------------------------------------------------------------------------|
| building, multi-storey   | 8.50E-06   | m <sup>3</sup> | market for building, multi-storey   building, multi-storey   Cutoff, U - GLO           |
| electricity, low voltage | 0.00765898 | kWh            | market group for electricity, low voltage   electricity, low voltage   Cutoff, U - RNA |
| electricity, low voltage | 0.01631241 | kWh            | market group for electricity, low voltage   electricity, low voltage   Cutoff, U - RAS |



|                                           |            |      |                                                                                                                                           |
|-------------------------------------------|------------|------|-------------------------------------------------------------------------------------------------------------------------------------------|
| electricity, low voltage                  | 6.56E-05   | kWh  | market for electricity, low voltage   electricity, low voltage   Cutoff, U - NZ                                                           |
| electricity, low voltage                  | 0.00148771 | kWh  | market for electricity, low voltage   electricity, low voltage   Cutoff, U - RU                                                           |
| electricity, low voltage                  | 0.00268881 | kWh  | market group for electricity, low voltage   electricity, low voltage   Cutoff, U - RLA                                                    |
| electricity, low voltage                  | 0.00533383 | kWh  | market group for electricity, low voltage   electricity, low voltage   Cutoff, U - Europe without Switzerland                             |
| electricity, low voltage                  | 0.00107866 | kWh  | market group for electricity, low voltage   electricity, low voltage   Cutoff, U - RAF                                                    |
| electricity, low voltage                  | 3.74E-04   | kWh  | market for electricity, low voltage   electricity, low voltage   Cutoff, U - AU                                                           |
| heat, district or industrial, natural gas | 0.001715   | MJ   | market for heat, district or industrial, natural gas   heat, district or industrial, natural gas   Cutoff, U - CA-QC                      |
| heat, district or industrial, natural gas | 0.03907741 | MJ   | market for heat, district or industrial, natural gas   heat, district or industrial, natural gas   Cutoff, U - Europe without Switzerland |
| heat, district or industrial, natural gas | 0.09695759 | MJ   | market for heat, district or industrial, natural gas   heat, district or industrial, natural gas   Cutoff, U - RoW                        |
| maize grain <sup>1</sup>                  | 1          | kg   | market for maize grain   maize grain   Cutoff, U - BR                                                                                     |
| Occupation, construction site             | 2.00E-06   | m2*a |                                                                                                                                           |
| Occupation, industrial area, built up     | 5.00E-05   | m2*a |                                                                                                                                           |
| tap water                                 | 6.83E-05   | kg   | market for tap water   tap water   Cutoff, U - PE                                                                                         |

---

<sup>1</sup> The flow "maize grain, organic" was substituted by "maize grain".

|                                              |            |    |                                                                           |
|----------------------------------------------|------------|----|---------------------------------------------------------------------------|
| tap water                                    | 0.02238367 | kg | market for tap water   tap water   Cutoff, U - Europe without Switzerland |
| tap water                                    | 6.30E-05   | kg | market for tap water   tap water   Cutoff, U - CA-QC                      |
| tap water                                    | 5.23E-04   | kg | market for tap water   tap water   Cutoff, U - BR                         |
| tap water                                    | 0.0300385  | kg | market for tap water   tap water   Cutoff, U - RoW                        |
| tap water                                    | 0.00262494 | kg | market for tap water   tap water   Cutoff, U - IN                         |
| tap water                                    | 1.94E-04   | kg | market for tap water   tap water   Cutoff, U - ZA                         |
| tap water                                    | 1.04E-04   | kg | market for tap water   tap water   Cutoff, U - CO                         |
| Transformation, from unknown                 | 1.00E-06   | m2 |                                                                           |
| Transformation, to industrial area, built up | 1.00E-06   | m2 |                                                                           |

#### Outputs

| Flow                     | Amount   | Unit | Provider                                                                                      |
|--------------------------|----------|------|-----------------------------------------------------------------------------------------------|
| <i>maize grain, feed</i> | 1        | kg   |                                                                                               |
| wastewater, average      | 2.57E-05 | m3   | market for wastewater, average   wastewater, average   Cutoff, U - RoW                        |
| wastewater, average      | 1.23E-05 | m3   | market for wastewater, average   wastewater, average   Cutoff, U - Europe without Switzerland |
| Water                    | 5.04E-05 | kg   |                                                                                               |

### Pizza, chorizo or salami

*Description:* Inventory of AGRIBALYSE v3.0.1, 2020.

The CIQUAL food item 'Pizza, chorizo or salami' matches with a recipe from ANSES.

Boundary with nature: Unspecified

## Inputs

| Flow<br>Agribalyse<br>3.0.1                               | Flow Ecoinvent 3.6<br>Cutoff U                         | Amount | Unit | Provider                                                                                                                                    | Description |
|-----------------------------------------------------------|--------------------------------------------------------|--------|------|---------------------------------------------------------------------------------------------------------------------------------------------|-------------|
| Cooking,<br>industrial, 1kg<br>of cooked<br>product/ FR U | Oven baking, 1kg of<br>baked product<br>(created flow) | 1      | kg   | Oven baking, 1kg<br>of baked product<br>(imported from<br>Agribalyse 3.0.1) -<br>BR (created<br>process, see<br>subprocesses<br>table)      |             |
| Dry sausages,<br>case ready, at<br>plant/FR U             | Sausage (created<br>flow)                              | 0.178  | kg   | Sausage - BR<br>(created process)                                                                                                           |             |
| Gruyere<br>cheese, from<br>cow's milk, at<br>plant/FR U   | cheese, from cow<br>milk, fresh,<br>unripened          | 0.102  | kg   | cheese<br>production, soft,<br>from cow milk  <br>cheese, from cow<br>milk, fresh,<br>unripened  <br>Cutoff, U (copy <sup>2</sup> ) -<br>BR |             |
| Tomato, for<br>processing,<br>peeled, at<br>plant/FR U    | tomato, processing<br>grade                            | 0.432  | kg   | tomato<br>production,<br>processing grade,<br>open field  <br>tomato,<br>processing grade<br>  Cutoff, U - RoW                              |             |

---

<sup>2</sup> All “copied” processes were duplicated from Ecoinvent 3.6 Cutoff, U Database and adapted to Brazil, considering the local electricity mix.

|                                                                                                                                                                                                                                                          |                                                                                                      |      |       |                                                                                                                                                                                                                                          |                                                                |
|----------------------------------------------------------------------------------------------------------------------------------------------------------------------------------------------------------------------------------------------------------|------------------------------------------------------------------------------------------------------|------|-------|------------------------------------------------------------------------------------------------------------------------------------------------------------------------------------------------------------------------------------------|----------------------------------------------------------------|
| Transport, freight, lorry with refrigeration machine, 7.5-16 ton, EURO5, R134a refrigerant, cooling {GLO}  transport, freight, lorry with refrigeration machine, 7.5-16 ton, EURO5, R134a refrigerant, cooling   Cutoff, S - Copied from Ecoinvent - GLO | transport, freight, lorry with refrigeration machine, 3.5-7.5 ton, EURO5, R134a refrigerant, cooling | 495  | kg*km | market for transport, freight, lorry with refrigeration machine, 3.5-7.5 ton, EURO5, R134a refrigerant, cooling   transport, freight, lorry with refrigeration machine, 3.5-7.5 ton, EURO5, R134a refrigerant, cooling   Cutoff, U - GLO | Transport to distribution, includes mass of packaging material |
| Water, municipal/FR U                                                                                                                                                                                                                                    | tap water                                                                                            | 0.13 | kg    | market for tap water   tap water   Cutoff, U - BR                                                                                                                                                                                        |                                                                |
| Wheat flour, at industrial mill/FR U                                                                                                                                                                                                                     | wheat flour                                                                                          | 0.22 | kg    | market for wheat flour   wheat flour   Cutoff, U - RoW                                                                                                                                                                                   |                                                                |

#### Outputs

| Flow<br>Agribalyse<br>3.0.1 | Flow Ecoinvent 3.6<br>Cutoff U | Amount | Unit | Provider | Description |
|-----------------------------|--------------------------------|--------|------|----------|-------------|
|-----------------------------|--------------------------------|--------|------|----------|-------------|

|                                                |                                 |        |    |  |                                                                                          |
|------------------------------------------------|---------------------------------|--------|----|--|------------------------------------------------------------------------------------------|
| <i>Pizza, chorizo or salami, at plant/FR U</i> | <i>Pizza, chorizo (created)</i> | 1      | kg |  | <i>The CIQUAL food item 'Pizza, chorizo or salami' matches with a recipe from ANSES.</i> |
| Water                                          | Water                           | 0.0622 | kg |  | Water evaporated                                                                         |

### Oven baking, industrial, 1kg of oven-baked product, for cooking

#### Inputs

| Flow Agribalyse 3.0.1                                                                  | Flow Ecoinvent 3.6 Cutoff U | Amount | Unit | Provider (Ecoinvent)                                                                        | Description                                                                                                                                                                                   |
|----------------------------------------------------------------------------------------|-----------------------------|--------|------|---------------------------------------------------------------------------------------------|-----------------------------------------------------------------------------------------------------------------------------------------------------------------------------------------------|
| Electricity, medium voltage {FR}  market for   Cut-off, S - Copied from Ecoinvent - FR | electricity, medium voltage | 1.35   | kWh  | market group for electricity, medium voltage   electricity, medium voltage   Cutoff, U - BR | Data from Life Cycle Assessment of the production of homemade and industrial bread in Sweden, M. Bimpeh, E. Djokoto, R. Jequier, 2006, data for industrial bread, from bakery data collection |

#### Outputs

| Flow Agribalyse 3.0.1                      | Flow Ecoinvent 3.6 Cutoff U                      | Amount | Unit | Provider (Ecoinvent) | Description |
|--------------------------------------------|--------------------------------------------------|--------|------|----------------------|-------------|
| Oven baking, industrial, 1kg of oven-baked | Oven baking, 1kg of baked product (created flow) | 1      | kg   | -                    | -           |

|                               |  |  |  |  |  |
|-------------------------------|--|--|--|--|--|
| product, for<br>cooking/ FR U |  |  |  |  |  |
|-------------------------------|--|--|--|--|--|

**Sausage meat, pure pork, raw, processed in FR | Chilled | Already packed - PET | at supermarket**

*Description:* "Inventory of AGRIBALYSE v3.0.1, 2020

This database has been produced as part of AGRIBALYSE program lead by ADEME and INRAE since 2009. It contains agricultural and food products produced and/or consumed in France. It follows CIQUAL nomenclature, the French nutritional database. AGRIBALYSEv3.0 is built upon previous work and datasets, in particular AGRIBALYSE v1.3 and v1.4 (French agricultural products); ACYVIA (food transformation), Ecoinvent v3.5 (imported products + non-food-datasets) and WFLDB v3.1 (imported products). Methodology principles follow the key international guidelines as much as possible (ISO, LEAP, PEF). All details and documentation available on [www.agribalyse.fr](http://www.agribalyse.fr)<<http://www.agribalyse.fr>>.

Propriété : ADEME

Générateur : Gingko 21, Sayari, Blonk Consultants.

Vérificateurs : RIVM, GreenDelta, Koch Consulting.

Property rights : OpenData, licence "Ecolab".

Contact : [agribalyse@ademe.fr](mailto:agribalyse@ademe.fr)

The overall DQR of this product is: 2.47 {P: 3.77, TiR: 2.02, GR: 1.93, TeR: 2.16}

Status: Finished

Boundary with nature: Unspecified"

# Inputs

| Flow Agribalyse<br>3.0.1                                                                                               | Flow Ecoinvent<br>3.6 Cutoff U                            | Amount         | Unit      | Provider<br>(Ecoinvent)                                                                                                                            | Description                                                                             |
|------------------------------------------------------------------------------------------------------------------------|-----------------------------------------------------------|----------------|-----------|----------------------------------------------------------------------------------------------------------------------------------------------------|-----------------------------------------------------------------------------------------|
| Electricity, low voltage {FR}   market for   Cut-off, S - Copied from Ecoinvent - FR                                   | electricity, low voltage                                  | 0.0777         | kWh       | market group for electricity, low voltage   electricity, low voltage   Cutoff, U - BR                                                              | Cooling at consumer                                                                     |
| PET (waste treatment) {GLO}   recycling of PET   Cut-off, S - Copied from Ecoinvent - GLO                              | waste polyethylene terephthalate, for recycling, unsorted | 0.0285         | kg        | market for waste polyethylene terephthalate, for recycling, unsorted   waste polyethylene terephthalate, for recycling, unsorted   Cutoff, U - RoW | Recycling of PET packaging material based on data from France (AGB)                     |
| Sausage meat, pure pork, raw, processed in FR   Chilled   Already packed - PET   at supermarket/FR                     | swine for slaughtering, live weight                       | 0.8776306<br>1 | kg        | swine production   swine for slaughtering, live weight   Cutoff, U (copy) - BR                                                                     | Modelled parameters: Edible fraction = 1.0, Raw-to-cooked fraction = 0.7916046424811652 |
| Transport, freight, lorry 16-32 metric ton, EURO5 {RER}   transport, freight, lorry 16-32 metric ton, EURO5   Cut-off, | transport, freight, lorry 16-32 metric ton, EURO5         | 0.9            | kg*k<br>m | market for transport, freight, lorry 16-32 metric ton, EURO5   transport, freight, lorry 16-32 metric ton,                                         | Transport of packaging waste to sorting centre (18 km)                                  |

|                                                                                                                                                                                                                    |                                        |          |    |                            |                                                                                 |
|--------------------------------------------------------------------------------------------------------------------------------------------------------------------------------------------------------------------|----------------------------------------|----------|----|----------------------------|---------------------------------------------------------------------------------|
| S - Copied from<br>Ecoinvent - RER                                                                                                                                                                                 |                                        |          |    | EURO5   Cutoff,<br>U - RoW |                                                                                 |
| Waste<br>polyethylene<br>terephthalate<br>{CH}  treatment<br>of waste<br>polyethylene<br>terephthalate,<br>municipal<br>incineration with<br>fly ash extraction<br>  Cut-off, S -<br>Copied from<br>Ecoinvent - CH | waste<br>polyethylene<br>terephthalate | 0.011825 | kg |                            | Incineration of PET<br>packaging material<br>based on data from<br>France (AGB) |
| Waste<br>polyethylene<br>terephthalate<br>{CH}  treatment<br>of waste<br>polyethylene<br>terephthalate,<br>sanitary landfill  <br>Cut-off, S -<br>Copied from<br>Ecoinvent - CH                                    | waste<br>polyethylene<br>terephthalate | 0.009675 | kg |                            | Landfilling of PET<br>packaging material<br>based on data from<br>France (AGB)  |

#### Outputs

| Flow Agribalyse<br>3.0.1 | Flow Ecoinvent<br>3.6 Cutoff U | Amount | Unit | Provider<br>(Ecoinvent) | Description |
|--------------------------|--------------------------------|--------|------|-------------------------|-------------|
|--------------------------|--------------------------------|--------|------|-------------------------|-------------|



|                                                                                                                                                               |  |  |      |  |                                                                                             |
|---------------------------------------------------------------------------------------------------------------------------------------------------------------|--|--|------|--|---------------------------------------------------------------------------------------------|
| Sausage meat,<br>pure pork, raw,<br>processed in FR /<br>Chilled / Already<br>packed - PET / No<br>preparation / at<br>consumer/FR<br>[Ciqual code:<br>30051] |  |  | 1 kg |  | The overall DQR of<br>this product is: 2.47<br>{P: 3.77, TIR: 2.02,<br>GR: 1.93, TeR: 2.16} |
|---------------------------------------------------------------------------------------------------------------------------------------------------------------|--|--|------|--|---------------------------------------------------------------------------------------------|

### **Bread, French bread (baguette or ball), with yeast, at plant**

*Description:* Inventory of AGRIBALYSE v3.0.1, 2020.

The CIQUAL food item 'Bread, French bread (baguette or ball), with yeast' matches with a recipe from ANSES.Boundary with nature: Unspecified

Inputs

| Flow Agribalyse<br>3.0.1                                  | Flow Ecoinvent<br>3.6                | Amount | Unit | Provider<br>(Ecoinvet)                                                                 | Description |
|-----------------------------------------------------------|--------------------------------------|--------|------|----------------------------------------------------------------------------------------|-------------|
| Cooking,<br>industrial, 1kg of<br>cooked product/<br>FR U | Oven baking, 1kg<br>of baked product | 1      | kg   | Oven baking, 1kg<br>of baked<br>product<br>(imported from<br>Agribalyse 3.0.1)<br>- BR |             |
| Rye flour, at<br>industrial mill/FR<br>U                  | wheat flour                          | 0.0814 | kg   | market for<br>wheat flour  <br>wheat flour  <br>Cutoff, U - RoW                        |             |

|                                                                                                                                                                  |                                                   |        |       |                                                                                                                                    |                                                                |
|------------------------------------------------------------------------------------------------------------------------------------------------------------------|---------------------------------------------------|--------|-------|------------------------------------------------------------------------------------------------------------------------------------|----------------------------------------------------------------|
| Transport, freight, lorry 16-32 metric ton, euro6 {RER}  market for transport, freight, lorry 16-32 metric ton, EURO6   Cut-off, S - Copied from Ecoinvent - RER | transport, freight, lorry 16-32 metric ton, EURO5 | 495    | kg*km | market for transport, freight, lorry 16-32 metric ton, EURO5   transport, freight, lorry 16-32 metric ton, EURO5   Cutoff, U - RoW | Transport to distribution, includes mass of packaging material |
| Water, municipal/FR U                                                                                                                                            | tap water                                         | 0.0923 | kg    | market for tap water   tap water   Cutoff, U - BR                                                                                  |                                                                |
| Water, municipal/FR U                                                                                                                                            | tap water                                         | 0.3    | kg    | market for tap water   tap water   Cutoff, U - BR                                                                                  |                                                                |
| Wheat flour, at industrial mill/FR U                                                                                                                             | wheat flour                                       | 0.526  | kg    | wheat grain processing, dry milling   wheat flour   Cutoff, U (created) - BR                                                       |                                                                |

#### Outputs

| Flow Agribalyse 3.0.1                                             | Flow Ecoinvent 3.6 | Amount | Unit | Provider (Ecoinvet) | Description                                                                                                 |
|-------------------------------------------------------------------|--------------------|--------|------|---------------------|-------------------------------------------------------------------------------------------------------------|
| Bread, French bread (baguette or ball), with yeast, at plant/FR U |                    | 1      | kg   |                     | The CIQUAL food item 'Bread, French bread (baguette or ball), with yeast' matches with a recipe from ANSES. |

## **Wheat production | wheat grain | Cutoff, U– BR**

Source process: wheat production | wheat grain | Cutoff, U – RoW

*Description: This dataset represents the production of 1 kg of wheat grain (fresh matter). The amounts of flows are weighted averages over all existing local crop production datasets available for this specific product. The weights are the annual production volumes of the local datasets relative to the sum of all local annual production volumes. The locations of considered datasets in the averaging procedure for this global dataset are Germany, Spain, France and USA. For references refer to the respective local datasets.*

*;*[This dataset was already contained in the ecoinvent database version 2. It was not individually updated during the transfer to ecoinvent version 3. Life Cycle Impact Assessment results may still have changed, as they are affected by changes in the supply chain, i.e. in other datasets. This dataset was generated following the ecoinvent quality guidelines for version 2. It may have been subject to central changes described in the ecoinvent version 3 change report (<http://www.ecoinvent.org/database/ecoinvent-version-3/reports-of-changes/>), and the results of the central updates were reviewed extensively. The changes added e.g. consistent water flows and other information throughout the database. The documentation of this dataset can be found in the ecoinvent reports of version 2, which are still available via the ecoinvent website. The change report linked above covers all central changes that were made during the conversion process.] This activity starts after the harvest of the previous crop. The inputs of seeds, mineral fertilisers, pesticides and irrigation water are considered. It is assumed that no organic fertilisers are applied.

*The dataset includes all machine operations and corresponding machine infrastructure and sheds. Machine operations are: soil cultivation, sowing, fertilisation, irrigation, weed control, pest and pathogen control, combine-harvest and transport from field to farm. Further, direct field emissions are included. This activity ends after harvest and drying of grains at the farm gate.*

## Inputs

| Flow                                                      | Amount     | Unit | Provider                                                                                                                                           | Description                                                                                                    |
|-----------------------------------------------------------|------------|------|----------------------------------------------------------------------------------------------------------------------------------------------------|----------------------------------------------------------------------------------------------------------------|
| [thio]carbamate-compound                                  | 4.98E-07   | kg   | market for [thio]carbamate-compound   [thio]carbamate-compound   Cutoff, U - GLO                                                                   | Averaged from local datasets.<br>See general comment.<br>Averaged from local datasets.<br>See general comment. |
| acetamide-anillide-compound, unspecified                  | 1.57E-07   | kg   | market for acetamide-anillide-compound, unspecified   acetamide-anillide-compound, unspecified   Cutoff, U - GLO                                   | Averaged from local datasets.<br>See general comment.<br>Averaged from local datasets.<br>See general comment. |
| ammonia, liquid                                           | 0.00752594 | kg   | market for ammonia, liquid   ammonia, liquid   Cutoff, U - RoW                                                                                     | Averaged from local datasets.<br>See general comment.<br>Averaged from local datasets.<br>See general comment. |
| ammonium nitrate, as N                                    | 0.00895431 | kg   | market for ammonium nitrate, as N   ammonium nitrate, as N   Cutoff, U - GLO                                                                       | Averaged from local datasets.<br>See general comment.<br>Averaged from local datasets.<br>See general comment. |
| ammonium sulfate, as N                                    | 6.72E-04   | kg   | market for ammonium sulfate, as N   ammonium sulfate, as N   Cutoff, U - GLO                                                                       | Averaged from local datasets.<br>See general comment.<br>Averaged from local datasets.<br>See general comment. |
| application of plant protection product, by field sprayer | 6.48E-04   | ha   | market for application of plant protection product, by field sprayer   application of plant protection product, by field sprayer   Cutoff, U - GLO | Averaged from local datasets.<br>See general comment.<br>Averaged from local datasets.<br>See general comment. |

|                                           |            |    |                                                                                                           |                                                                                                                                                                                                                                        |
|-------------------------------------------|------------|----|-----------------------------------------------------------------------------------------------------------|----------------------------------------------------------------------------------------------------------------------------------------------------------------------------------------------------------------------------------------|
| benzoic-compound                          | 1.33E-06   | kg | market for benzoic-compound   benzoic-compound   Cutoff, U - GLO                                          | Averaged from local datasets.<br>See general comment.<br>Averaged from local datasets.<br>See general comment.                                                                                                                         |
| Carbon dioxide                            | 1.38865745 | kg |                                                                                                           | Averaged from local datasets.<br>See general comment.                                                                                                                                                                                  |
| combine harvesting                        | 2.51E-04   | ha | combine harvesting   combine harvesting   Cutoff, U - BR                                                  | Averaged from local datasets.<br>See general comment.<br>Averaged from local datasets.<br>See general comment.                                                                                                                         |
| cyclic N-compound                         | 1.92E-05   | kg | market for cyclic N-compound   cyclic N-compound   Cutoff, U - GLO                                        | Averaged from local datasets.<br>See general comment.<br>Averaged from local datasets.<br>See general comment.                                                                                                                         |
| diphenylether-compound                    | 7.52E-06   | kg | market for diphenylether-compound   diphenylether-compound   Cutoff, U - GLO                              | Averaged from local datasets.<br>See general comment.<br>Averaged from local datasets.<br>See general comment.                                                                                                                         |
| drying of bread grain, seed and legumes   | 0.00294125 | l  | drying of bread grain, seed and legumes   drying of bread grain, seed and legumes   Cutoff, U - Copy - BR | Averaged from local datasets.<br>See general comment.<br>Averaged from local datasets.<br>See general comment.                                                                                                                         |
| Energy, gross calorific value, in biomass | 14.7876189 | MJ |                                                                                                           | Calculated as a weighted (by production volumes) average of the regional activities. The uncertainty is set up to be the same as in case of the regional activities, only the padigree matrix is adjusted from 2,1,1,1,1 to 2,1,1,1,5. |

|                             |            |    |                                                                            |                                                                                                                                                                                                                                  |
|-----------------------------|------------|----|----------------------------------------------------------------------------|----------------------------------------------------------------------------------------------------------------------------------------------------------------------------------------------------------------------------------|
| fertilising, by broadcaster | 8.94E-04   | ha | fertilising, by broadcaster   fertilising, by broadcaster   Cutoff, U - BR | Averaged from local datasets.<br>See general comment.<br>Averaged from local datasets.<br>See general comment.                                                                                                                   |
| glyphosate                  | 3.47E-05   | kg | market for glyphosate   glyphosate   Cutoff, U - GLO                       | Averaged from local datasets.<br>See general comment.<br>Averaged from local datasets.<br>See general comment.                                                                                                                   |
| irrigation                  | 0.00762631 | m3 | market for irrigation   irrigation   Cutoff, U - BR                        | Averaged from local datasets.<br>See general comment.<br>Averaged from local datasets.<br>See general comment.<br>Averaged from local datasets.<br>See general comment.<br>Averaged from local datasets.<br>See general comment. |
| irrigation                  | 0.06817404 | m3 | market for irrigation   irrigation   Cutoff, U - BR                        | Averaged from local datasets.<br>See general comment.<br>Averaged from local datasets.<br>See general comment.<br>Averaged from local datasets.<br>See general comment.<br>Averaged from local datasets.<br>See general comment. |
| irrigation                  | 0.00111719 | m3 | market for irrigation   irrigation   Cutoff, U - BR                        | Averaged from local datasets.<br>See general comment.<br>Averaged from local datasets.<br>See general comment.<br>Averaged from local datasets.<br>See general comment.<br>Averaged from local datasets.<br>See general comment. |
| irrigation                  | 0.0025183  | m3 | market for irrigation   irrigation   Cutoff, U - BR                        | Averaged from local datasets.<br>See general comment.<br>Averaged from local datasets.                                                                                                                                           |

|            |            |    |                                                        |                                                                                                                                                                                                                                  |
|------------|------------|----|--------------------------------------------------------|----------------------------------------------------------------------------------------------------------------------------------------------------------------------------------------------------------------------------------|
|            |            |    |                                                        | See general comment.<br>Averaged from local datasets.<br>See general comment.<br>Averaged from local datasets.<br>See general comment.                                                                                           |
| irrigation | 0.24592798 | m3 | market for irrigation  <br>irrigation   Cutoff, U - BR | Averaged from local datasets.<br>See general comment.<br>Averaged from local datasets.<br>See general comment.<br>Averaged from local datasets.<br>See general comment.<br>Averaged from local datasets.<br>See general comment. |
| irrigation | 8.61E-04   | m3 | market for irrigation  <br>irrigation   Cutoff, U - BR | Averaged from local datasets.<br>See general comment.<br>Averaged from local datasets.<br>See general comment.<br>Averaged from local datasets.<br>See general comment.<br>Averaged from local datasets.<br>See general comment. |
| irrigation | 0.0023077  | m3 | market for irrigation  <br>irrigation   Cutoff, U - BR | Averaged from local datasets.<br>See general comment.<br>Averaged from local datasets.<br>See general comment.<br>Averaged from local datasets.<br>See general comment.<br>Averaged from local datasets.<br>See general comment. |
| irrigation | 1.29E-05   | m3 | market for irrigation  <br>irrigation   Cutoff, U - BR | Averaged from local datasets.<br>See general comment.<br>Averaged from local datasets.<br>See general comment.<br>Averaged from local datasets.<br>See general comment.                                                          |

|                                       |            |      |                                                                                             |                                                                                                                                                                                                                                  |
|---------------------------------------|------------|------|---------------------------------------------------------------------------------------------|----------------------------------------------------------------------------------------------------------------------------------------------------------------------------------------------------------------------------------|
|                                       |            |      |                                                                                             | Averaged from local datasets.<br>See general comment.                                                                                                                                                                            |
| irrigation                            | 5.03E-04   | m3   | market for irrigation  <br>irrigation   Cutoff, U - BR                                      | Averaged from local datasets.<br>See general comment.<br>Averaged from local datasets.<br>See general comment.<br>Averaged from local datasets.<br>See general comment.<br>Averaged from local datasets.<br>See general comment. |
| irrigation                            | 0.01277062 | m3   | market for irrigation  <br>irrigation   Cutoff, U - BR                                      | Averaged from local datasets.<br>See general comment.<br>Averaged from local datasets.<br>See general comment.<br>Averaged from local datasets.<br>See general comment.<br>Averaged from local datasets.<br>See general comment. |
| lime                                  | 5.60E-04   | kg   | lime production, milled,<br>loose   lime   Cutoff, U<br>(copy) - BR                         | Averaged from local datasets.<br>See general comment.<br>Averaged from local datasets.<br>See general comment.                                                                                                                   |
| nitrile-compound                      | 2.47E-05   | kg   | market for nitrile-<br>compound   nitrile-<br>compound   Cutoff, U -<br>GLO                 | Averaged from local datasets.<br>See general comment.<br>Averaged from local datasets.<br>See general comment.                                                                                                                   |
| nitrogen fertiliser,<br>as N          | 0.00779824 | kg   | market for nitrogen<br>fertiliser, as N   nitrogen<br>fertiliser, as N   Cutoff, U<br>- GLO | Averaged from local datasets.<br>See general comment.<br>Averaged from local datasets.<br>See general comment.                                                                                                                   |
| Occupation, arable                    | 2.06542116 | m2*a |                                                                                             | Averaged from local datasets.<br>See general comment.                                                                                                                                                                            |
| Occupation, arable,<br>non-irrigated, | 0.80941575 | m2*a |                                                                                             | Averaged from local datasets.<br>See general comment.                                                                                                                                                                            |



|                                        |            |    |                                                                                                              |                                                                                                                                                                                                                                                                                                                                                                                                                                                                                                                                                                                                                  |
|----------------------------------------|------------|----|--------------------------------------------------------------------------------------------------------------|------------------------------------------------------------------------------------------------------------------------------------------------------------------------------------------------------------------------------------------------------------------------------------------------------------------------------------------------------------------------------------------------------------------------------------------------------------------------------------------------------------------------------------------------------------------------------------------------------------------|
| monotone-intensive                     |            |    |                                                                                                              |                                                                                                                                                                                                                                                                                                                                                                                                                                                                                                                                                                                                                  |
| organophosphorus-compound, unspecified | 3.25E-06   | kg | market for organophosphorus-compound, unspecified   organophosphorus-compound, unspecified   Cutoff, U - GLO | Averaged from local datasets. See general comment. Averaged from local datasets. See general comment.                                                                                                                                                                                                                                                                                                                                                                                                                                                                                                            |
| packaging, for fertilisers             | 0.12483697 | kg | market for packaging, for fertilisers   packaging, for fertilisers   Cutoff, U - GLO                         | Total amount of active substance/s of fertilisers needed for the production of 'wheat grain' is calculated to be circa 6.30E-02 kg. Fertiliser/s used in this dataset is/are: 'ammonia, liquid', 'ammonium nitrate, as N', 'ammonium sulfate, as N', 'lime', 'nitrogen fertiliser, as N', 'phosphate fertiliser, as P2O5', 'potassium chloride, as K2O', 'urea, as N'. The total amount of active substance/s is doubled in order to account for the packaging of the dilluted product of fertiliser/s that is/are applied. Therefore, 1.26E-01 kg of packaging for fertilisers is justified with this exchange. |
| packaging, for pesticides              | 5.64E-04   | kg | market for packaging, for pesticides   packaging, for pesticides   Cutoff, U - GLO                           | Total amount of active substance/s of pesticides needed for the production of wheat grain is calculated to be circa 2.85E-04 kg. Pesticide/s used in this dataset is/are: '[sulfonyl]urea-compound', '[thio]carbamate-compound',                                                                                                                                                                                                                                                                                                                                                                                 |

|                               |            |    |                                                                                            |                                                                                                                                                                                                                                                                                                                                                                                                                                                                                                                                                                         |
|-------------------------------|------------|----|--------------------------------------------------------------------------------------------|-------------------------------------------------------------------------------------------------------------------------------------------------------------------------------------------------------------------------------------------------------------------------------------------------------------------------------------------------------------------------------------------------------------------------------------------------------------------------------------------------------------------------------------------------------------------------|
|                               |            |    |                                                                                            | <p>'acetamide-anillide-compound, unspecified', 'benzoic-compound', 'cyclic N-compound', 'diphenylether-compound', 'glyphosate', 'nitrile-compound', 'organophosphorus-compound, unspecified', 'pesticide, unspecified', 'phenoxy-compound', 'pyrethroid-compound', 'pyridazine-compound', 'triazine-compound, unspecified'. The total amount of active substance/s is doubled in order to account for the packaging of the dilluted product of pesticide/s that is/are applied. Therefore, 5.69E-04 kg of packaging for pesticides is justified with this exchange.</p> |
| pesticide, unspecified        | 1.31E-04   | kg | market for pesticide, unspecified   pesticide, unspecified   Cutoff, U - GLO               | <p>Averaged from local datasets.<br/>See general comment.<br/>Averaged from local datasets.<br/>See general comment.</p>                                                                                                                                                                                                                                                                                                                                                                                                                                                |
| phenoxy-compound              | 3.79E-05   | kg | market for phenoxy-compound   phenoxy-compound   Cutoff, U - GLO                           | <p>Averaged from local datasets.<br/>See general comment.<br/>Averaged from local datasets.<br/>See general comment.</p>                                                                                                                                                                                                                                                                                                                                                                                                                                                |
| phosphate fertiliser, as P2O5 | 0.01411099 | kg | market for phosphate fertiliser, as P2O5   phosphate fertiliser, as P2O5   Cutoff, U - GLO | <p>Averaged from local datasets.<br/>See general comment.<br/>Averaged from local datasets.<br/>See general comment.</p>                                                                                                                                                                                                                                                                                                                                                                                                                                                |
| potassium chloride, as K2O    | 0.01952486 | kg | market for potassium chloride, as K2O                                                      | <p>Averaged from local datasets.<br/>See general comment.</p>                                                                                                                                                                                                                                                                                                                                                                                                                                                                                                           |

|                                           |          |    |                                                                                                                    |                                                                                                                |
|-------------------------------------------|----------|----|--------------------------------------------------------------------------------------------------------------------|----------------------------------------------------------------------------------------------------------------|
|                                           |          |    | potassium chloride, as K2O   Cutoff, U - GLO                                                                       | Averaged from local datasets.<br>See general comment.                                                          |
| pyrethroid-compound                       | 7.29E-07 | kg | market for pyrethroid-compound   pyrethroid-compound   Cutoff, U - GLO                                             | Averaged from local datasets.<br>See general comment.<br>Averaged from local datasets.<br>See general comment. |
| pyridazine-compound                       | 9.54E-06 | kg | market for pyridazine-compound   pyridazine-compound   Cutoff, U - GLO                                             | Averaged from local datasets.<br>See general comment.<br>Averaged from local datasets.<br>See general comment. |
| sowing                                    | 2.87E-04 | ha | market for sowing   sowing   Cutoff, U - GLO                                                                       | Averaged from local datasets.<br>See general comment.<br>Averaged from local datasets.<br>See general comment. |
| tillage, cultivating, chiselling          | 2.40E-05 | ha | market for tillage, cultivating, chiselling   tillage, cultivating, chiselling   Cutoff, U - GLO                   | Averaged from local datasets.<br>See general comment.<br>Averaged from local datasets.<br>See general comment. |
| tillage, harrowing, by rotary harrow      | 9.65E-05 | ha | market for tillage, harrowing, by rotary harrow   tillage, harrowing, by rotary harrow   Cutoff, U - GLO           | Averaged from local datasets.<br>See general comment.<br>Averaged from local datasets.<br>See general comment. |
| tillage, harrowing, by spring tine harrow | 4.90E-04 | ha | market for tillage, harrowing, by spring tine harrow   tillage, harrowing, by spring tine harrow   Cutoff, U - GLO | Averaged from local datasets.<br>See general comment.<br>Averaged from local datasets.<br>See general comment. |
| tillage, ploughing                        | 6.69E-05 | ha | market for tillage, ploughing   tillage, ploughing   Cutoff, U - GLO                                               | Averaged from local datasets.<br>See general comment.<br>Averaged from local datasets.<br>See general comment. |

|                                                                              |            |      |                                                                                                                                        |                                                                                                                |
|------------------------------------------------------------------------------|------------|------|----------------------------------------------------------------------------------------------------------------------------------------|----------------------------------------------------------------------------------------------------------------|
| tillage, rolling                                                             | 2.17E-04   | ha   | market for tillage, rolling<br>  tillage, rolling   Cutoff,<br>U - GLO                                                                 | Averaged from local datasets.<br>See general comment.<br>Averaged from local datasets.<br>See general comment. |
| Transformation,<br>from arable                                               | 2.06542116 | m2   |                                                                                                                                        | Averaged from local datasets.<br>See general comment.                                                          |
| Transformation,<br>from arable, non-<br>irrigated,<br>monotone-<br>intensive | 0.80609862 | m2   |                                                                                                                                        | Averaged from local datasets.<br>See general comment.                                                          |
| Transformation, to<br>arable                                                 | 2.06542116 | m2   |                                                                                                                                        | Averaged from local datasets.<br>See general comment.                                                          |
| Transformation, to<br>arable, non-<br>irrigated,<br>monotone-<br>intensive   | 0.80609862 | m2   |                                                                                                                                        | Averaged from local datasets.<br>See general comment.                                                          |
| transport, tractor<br>and trailer,<br>agricultural                           | 0.00152612 | t*km | market for transport,<br>tractor and trailer,<br>agricultural   transport,<br>tractor and trailer,<br>agricultural   Cutoff, U -<br>CH | Averaged from local datasets.<br>See general comment.<br>Averaged from local datasets.<br>See general comment. |
| triazine-compound,<br>unspecified                                            | 2.27E-06   | kg   | market for triazine-<br>compound, unspecified  <br>triazine-compound,<br>unspecified   Cutoff, U -<br>GLO                              | Averaged from local datasets.<br>See general comment.<br>Averaged from local datasets.<br>See general comment. |
| urea, as N                                                                   | 0.00327195 | kg   | market for urea, as N  <br>urea, as N   Cutoff, U -<br>GLO                                                                             | Averaged from local datasets.<br>See general comment.<br>Averaged from local datasets.<br>See general comment. |

|                        |            |    |                                                                              |                                                    |
|------------------------|------------|----|------------------------------------------------------------------------------|----------------------------------------------------|
| wheat seed, for sowing | 0.03290255 | kg | market for wheat seed, for sowing   wheat seed, for sowing   Cutoff, U - GLO | Averaged from local datasets. See general comment. |
|------------------------|------------|----|------------------------------------------------------------------------------|----------------------------------------------------|

## Outputs

| Flow                      | Amount      | Unit | Provider | Description                                        |
|---------------------------|-------------|------|----------|----------------------------------------------------|
| Ammonia                   | 0.001932316 | kg   |          | Averaged from local datasets. See general comment. |
| Anthraquinone             | 2.37E-06    | kg   |          | Averaged from local datasets. See general comment. |
| Atrazine                  | 1.35E-06    | kg   |          | Averaged from local datasets. See general comment. |
| Azoxystrobin              | 3.21E-06    | kg   |          | Averaged from local datasets. See general comment. |
| Bifenox                   | 1.58E-06    | kg   |          | Averaged from local datasets. See general comment. |
| Bitertanol                | 3.53E-08    | kg   |          | Averaged from local datasets. See general comment. |
| Bromoxynil                | 5.98E-06    | kg   |          | Averaged from local datasets. See general comment. |
| Bromuconazole             | 1.07E-07    | kg   |          | Averaged from local datasets. See general comment. |
| Cadmium                   | 1.14E-06    | kg   |          | Averaged from local datasets. See general comment. |
| Cadmium, ion              | 1.21E-08    | kg   |          | Averaged from local datasets. See general comment. |
| Cadmium, ion              | 6.89E-09    | kg   |          | Averaged from local datasets. See general comment. |
| Carbon dioxide, fossil    | 0.009788665 | kg   |          | Averaged from local datasets. See general comment. |
| Carfentrazone ethyl ester | 3.25E-08    | kg   |          | Averaged from local datasets. See general comment. |
| Chloridazon               | 9.54E-06    | kg   |          | Averaged from local datasets. See general comment. |
| Chlormequat               | 4.93E-05    | kg   |          | Averaged from local datasets. See general comment. |
| Chlorpyrifos              | 1.99E-06    | kg   |          | Averaged from local datasets. See general comment. |
| Chlorsulfuron             | 1.47E-07    | kg   |          | Averaged from local datasets. See general comment. |

|                      |           |    |  |                                                    |
|----------------------|-----------|----|--|----------------------------------------------------|
| Choline chloride     | 2.03E-05  | kg |  | Averaged from local datasets. See general comment. |
| Chromium             | 3.92E-06  | kg |  | Averaged from local datasets. See general comment. |
| Chromium, ion        | 5.52E-06  | kg |  | Averaged from local datasets. See general comment. |
| Chromium, ion        | 7.44E-07  | kg |  | Averaged from local datasets. See general comment. |
| Clodinafop-propargyl | 2.18E-06  | kg |  | Averaged from local datasets. See general comment. |
| Clopyralid           | 1.45E-06  | kg |  | Averaged from local datasets. See general comment. |
| Cloquintocet-mexyl   | 5.27E-07  | kg |  | Averaged from local datasets. See general comment. |
| Copper               | -1.09E-06 | kg |  | Averaged from local datasets. See general comment. |
| Copper, ion          | 8.08E-07  | kg |  | Averaged from local datasets. See general comment. |
| Copper, ion          | 5.36E-07  | kg |  | Averaged from local datasets. See general comment. |
| Cypermethrin         | 3.88E-07  | kg |  | Averaged from local datasets. See general comment. |
| Cyproconazole        | 8.64E-07  | kg |  | Averaged from local datasets. See general comment. |
| Cyprodinil           | 1.28E-05  | kg |  | Averaged from local datasets. See general comment. |
| Deltamethrin         | 7.49E-08  | kg |  | Averaged from local datasets. See general comment. |
| Dicamba              | 1.33E-06  | kg |  | Averaged from local datasets. See general comment. |
| Diclofop             | 3.22E-06  | kg |  | Averaged from local datasets. See general comment. |
| Diclofop-methyl      | 3.65E-06  | kg |  | Averaged from local datasets. See general comment. |
| Diflufenican         | 3.45E-06  | kg |  | Averaged from local datasets. See general comment. |
| Dimethoate           | 1.43E-07  | kg |  | Averaged from local datasets. See general comment. |
| Dinitrogen monoxide  | 8.93E-04  | kg |  | Averaged from local datasets. See general comment. |
| Diuron               | 5.07E-07  | kg |  | Averaged from local datasets. See general comment. |
| Epoxiconazole        | 1.22E-06  | kg |  | Averaged from local datasets. See general comment. |
| Ethephon             | 1.02E-07  | kg |  | Averaged from local datasets. See general comment. |
| Fenoxaprop           | 3.69E-08  | kg |  | Averaged from local datasets. See general comment. |

|                            |          |    |  |                                                    |
|----------------------------|----------|----|--|----------------------------------------------------|
| Fenoxaprop ethyl ester     | 2.68E-07 | kg |  | Averaged from local datasets. See general comment. |
| Fenpropidin                | 6.94E-06 | kg |  | Averaged from local datasets. See general comment. |
| Fenpropimorph              | 1.30E-06 | kg |  | Averaged from local datasets. See general comment. |
| Florasulam                 | 9.99E-09 | kg |  | Averaged from local datasets. See general comment. |
| Flucarbazon sodium salt    | 9.21E-09 | kg |  | Averaged from local datasets. See general comment. |
| Fludioxonil                | 2.25E-07 | kg |  | Averaged from local datasets. See general comment. |
| Flufenacet                 | 9.56E-07 | kg |  | Averaged from local datasets. See general comment. |
| Flupyr-sulfuron-methyl     | 1.43E-08 | kg |  | Averaged from local datasets. See general comment. |
| Fluroxypyr                 | 6.23E-06 | kg |  | Averaged from local datasets. See general comment. |
| Flurtamone                 | 9.96E-07 | kg |  | Averaged from local datasets. See general comment. |
| Glyphosate                 | 3.47E-05 | kg |  | Averaged from local datasets. See general comment. |
| Imazamox                   | 5.53E-08 | kg |  | Averaged from local datasets. See general comment. |
| Imidacloprid               | 1.65E-07 | kg |  | Averaged from local datasets. See general comment. |
| Iodosulfuron-methyl-sodium | 8.93E-09 | kg |  | Averaged from local datasets. See general comment. |
| Ioxynil                    | 6.10E-06 | kg |  | Averaged from local datasets. See general comment. |
| Isoproturon                | 7.75E-06 | kg |  | Averaged from local datasets. See general comment. |
| Kresoxim-methyl            | 3.41E-07 | kg |  | Averaged from local datasets. See general comment. |
| Lambda-cyhalothrin         | 3.03E-07 | kg |  | Averaged from local datasets. See general comment. |
| Lead                       | 7.22E-07 | kg |  | Averaged from local datasets. See general comment. |
| Lead                       | 2.34E-08 | kg |  | Averaged from local datasets. See general comment. |
| Lead                       | 8.81E-08 | kg |  | Averaged from local datasets. See general comment. |
| MCPA                       | 1.55E-05 | kg |  | Averaged from local datasets. See general comment. |
| Mecoprop                   | 8.42E-06 | kg |  | Averaged from local datasets. See general comment. |

|                            |             |    |  |                                                    |
|----------------------------|-------------|----|--|----------------------------------------------------|
| Mecoprop-P                 | 2.07E-06    | kg |  | Averaged from local datasets. See general comment. |
| Mefenpyr                   | 5.37E-07    | kg |  | Averaged from local datasets. See general comment. |
| Mepiquat chloride          | 1.87E-07    | kg |  | Averaged from local datasets. See general comment. |
| Mercury                    | -2.05E-11   | kg |  | Averaged from local datasets. See general comment. |
| Mercury                    | 6.33E-11    | kg |  | Averaged from local datasets. See general comment. |
| Mercury                    | 5.00E-11    | kg |  | Averaged from local datasets. See general comment. |
| Mesosulfuron-methyl (prop) | 4.92E-08    | kg |  | Averaged from local datasets. See general comment. |
| Metaldehyde                | 6.66E-06    | kg |  | Averaged from local datasets. See general comment. |
| Metconazole                | 1.51E-07    | kg |  | Averaged from local datasets. See general comment. |
| Metosulam                  | 2.82E-08    | kg |  | Averaged from local datasets. See general comment. |
| Metribuzin                 | 8.48E-07    | kg |  | Averaged from local datasets. See general comment. |
| Metsulfuron-methyl         | 1.71E-07    | kg |  | Averaged from local datasets. See general comment. |
| Nickel                     | 1.45E-06    | kg |  | Averaged from local datasets. See general comment. |
| Nickel, ion                | 4.37E-07    | kg |  | Averaged from local datasets. See general comment. |
| Nitrate                    | 0.020970147 | kg |  | Averaged from local datasets. See general comment. |
| Nitrogen oxides            | 1.87E-04    | kg |  | Averaged from local datasets. See general comment. |
| Parathion                  | 1.16E-06    | kg |  | Averaged from local datasets. See general comment. |
| Phosphate                  | 3.14E-05    | kg |  | Averaged from local datasets. See general comment. |
| Phosphate                  | 4.32E-04    | kg |  | Averaged from local datasets. See general comment. |
| Phosphorus                 | 3.09E-04    | kg |  | Averaged from local datasets. See general comment. |
| Picloram                   | 1.84E-08    | kg |  | Averaged from local datasets. See general comment. |
| Picoxystrobin              | 3.48E-07    | kg |  | Averaged from local datasets. See general comment. |
| Prochloraz                 | 7.54E-07    | kg |  | Averaged from local datasets. See general comment. |
| Prohexadione-calcium       | 1.11E-08    | kg |  | Averaged from local datasets. See general comment. |
| Propiconazole              | 4.44E-06    | kg |  | Averaged from local datasets. See general comment. |



|                                |             |    |  |                                                                                                                |
|--------------------------------|-------------|----|--|----------------------------------------------------------------------------------------------------------------|
| Propoxycarbazone-sodium (prop) | 6.16E-08    | kg |  | Averaged from local datasets. See general comment.                                                             |
| Prosulfuron                    | 9.21E-09    | kg |  | Averaged from local datasets. See general comment.                                                             |
| Pyraclostrobin (prop)          | 1.36E-06    | kg |  | Averaged from local datasets. See general comment.                                                             |
| Quinoxifen                     | 5.38E-07    | kg |  | Averaged from local datasets. See general comment.                                                             |
| Silthiofam                     | 8.27E-07    | kg |  | Averaged from local datasets. See general comment.                                                             |
| Spiroxamine                    | 3.62E-06    | kg |  | Averaged from local datasets. See general comment.                                                             |
| Sulfosulfuron                  | 2.21E-07    | kg |  | Averaged from local datasets. See general comment.                                                             |
| Tebuconazole                   | 3.56E-06    | kg |  | Averaged from local datasets. See general comment.                                                             |
| Tefluthrin                     | 2.53E-08    | kg |  | Averaged from local datasets. See general comment.                                                             |
| Thifensulfuron-methyl          | 1.49E-07    | kg |  | Averaged from local datasets. See general comment.                                                             |
| Tralkoxydim                    | 6.45E-08    | kg |  | Averaged from local datasets. See general comment.                                                             |
| Triadimenol                    | 1.26E-07    | kg |  | Averaged from local datasets. See general comment.                                                             |
| Triallate                      | 4.98E-07    | kg |  | Averaged from local datasets. See general comment.                                                             |
| Triasulfuron                   | 1.47E-07    | kg |  | Averaged from local datasets. See general comment.                                                             |
| Tribenuron-methyl              | 1.70E-07    | kg |  | Averaged from local datasets. See general comment.                                                             |
| Trifloxystrobin                | 6.85E-07    | kg |  | Averaged from local datasets. See general comment.                                                             |
| Trinexapac-ethyl               | 9.82E-07    | kg |  | Averaged from local datasets. See general comment.                                                             |
| Water                          | 0.23296976  | kg |  | Calculated value based on literature values and expert opinion. See comments in the parametres' comment field. |
| Water                          | 0.08707959  | kg |  | Calculated value. See the parameters and their comments to understand the calculation.                         |
| Water                          | 0.021769898 | kg |  | Calculated value. See the parameters and their comments to understand the calculation.                         |
| wheat grain                    | 1           | kg |  |                                                                                                                |
| Zinc                           | 4.83E-06    | kg |  | Averaged from local datasets. See general comment.                                                             |

|           |          |    |  |                                                    |
|-----------|----------|----|--|----------------------------------------------------|
| Zinc, ion | 3.66E-06 | kg |  | Averaged from local datasets. See general comment. |
| Zinc, ion | 6.57E-07 | kg |  | Averaged from local datasets. See general comment. |

### **Wheat grain processing, dry milling | wheat flour | Cutoff, U – BR**

*Original process:* Wheat grain processing, dry milling | wheat flour | Cutoff, U – RoW

*Description:* This dataset represents the production of 1 kg of wheat flour for human consumption, and secondary products of wheat bran and wheat screenings for animal feed production from global dry milling practices. The wheat flour represents all milled products intended for human consumption i.e. cake flour, self-raising flour, white bread flour, brown bread flour, whole wheat meal, and semolina. Flours and meals are typically used for baking bread and other baked goods, while semolina the coarse, purified wheat middlings of durum wheat is used mainly in the making of pasta and couscous. The module includes the receiving of wheat and processing thereof through multiple grinding and sieving steps. Activities that have been considered in this dataset are the inputs of wheat, water and electricity.;Boundary with exchanges for wheat grain processing, dry milling, GLO 2017 This activity starts with the wheat received at the gate of the dry milling plant. This activity ends with the delivery of 1 kg of milled wheat products and by-product(s) at the factory gate of the milling plant.

#### Inputs

| Flow                   | Amount   | Unit | Provider                                                                             | Description                                                                                                                                                                                                                                                                                                                                  |
|------------------------|----------|------|--------------------------------------------------------------------------------------|----------------------------------------------------------------------------------------------------------------------------------------------------------------------------------------------------------------------------------------------------------------------------------------------------------------------------------------------|
| building, multi-storey | 0.000009 | m3   | building construction, multi-storey   building, multi-storey   Cutoff, U (copy) - BR | Estimation. Not geography specific.<br>Value and comment from "maize grain, feed production, GLO": The typical storage capacity of the cereal silo found in some feed processing centres in Switzerland is 10,000 tonnes, with an effective storage volume of about 80% of the building volume. With an average grain specific weight of 750 |

|                          |          |     |                                                          |                                                                                                                                                                                                                                                                                                                                                                                                                                                                                                                                                                                                                                                                                                                                                                                                                                                                                                                                                                                                                                                                                                                                                                                                                                                                                                                                   |
|--------------------------|----------|-----|----------------------------------------------------------|-----------------------------------------------------------------------------------------------------------------------------------------------------------------------------------------------------------------------------------------------------------------------------------------------------------------------------------------------------------------------------------------------------------------------------------------------------------------------------------------------------------------------------------------------------------------------------------------------------------------------------------------------------------------------------------------------------------------------------------------------------------------------------------------------------------------------------------------------------------------------------------------------------------------------------------------------------------------------------------------------------------------------------------------------------------------------------------------------------------------------------------------------------------------------------------------------------------------------------------------------------------------------------------------------------------------------------------|
|                          |          |     |                                                          | <p>kg/m<sup>3</sup>, this gives a building volume of about 16,650 m<sup>3</sup>. Assuming that these feed processing centres process 25,000 tonnes of grain per year, the cereals will be stored for about three months before being processed. The largest feed processing centre in Switzerland (UFA-Biblis) has a feedstuff storage compound of 29,440 m<sup>3</sup> (80 m length * 23 m * 16 m height) with an effective storage capacity of 4,140 tonnes (5520 palettes of 750 kg), or about 150 kg/m<sup>3</sup> (UFA 2002). This centre processes 275,000 tonnes of concentrate feeds yearly. After processing, the feedstuff must therefore be stored for approx. one week in the processing centre before being sent to the regional storehouse. The average length of storage of the raw materials is set at 3 months in the calculations. The storage volume required was estimated as 1.7 m<sup>3</sup>/tonne of raw material (grain specific weight 750 kg/m<sup>3</sup> and 80% of the building volume used for storage). The lifetime of the storage silo was assumed to be 50 years, the length of the construction phase 2 years. Land use was estimated from the height of Biblis's storage silo (UFA 2002). Taking the height of 16 m, the area used is 0.1 m<sup>2</sup>/tonne of feedstuff for 3 months.</p> |
| electricity, low voltage | 0.016152 | kWh | market group for electricity, low voltage   electricity, | Average electricity use of two dry milling facilities in South Africa: a                                                                                                                                                                                                                                                                                                                                                                                                                                                                                                                                                                                                                                                                                                                                                                                                                                                                                                                                                                                                                                                                                                                                                                                                                                                          |

|                                        |          |                   |                                                                                                              |                                                                                                                                                                                                                                                                                                                                                                                                                                               |
|----------------------------------------|----------|-------------------|--------------------------------------------------------------------------------------------------------------|-----------------------------------------------------------------------------------------------------------------------------------------------------------------------------------------------------------------------------------------------------------------------------------------------------------------------------------------------------------------------------------------------------------------------------------------------|
|                                        |          |                   | low voltage   Cutoff, U - BR                                                                                 | combined wheat & maize mill, and a dedicated wheat mill.                                                                                                                                                                                                                                                                                                                                                                                      |
| industrial machine, heavy, unspecified | 0.000015 | kg                | market for industrial machine, heavy, unspecified   industrial machine, heavy, unspecified   Cutoff, U - RoW | Estimate from industrial machinery used in "Limestone, crushed, for mill production" (annual production of 195,000 tonnes), which is assumed to provide a good proxy for flour milling. Value adapted on the basis of annual production, which was estimated to be an average of 415,000 tonnes per year, based on the production figures of two dry milling facilities in South Africa. The estimated life span of the machines is 25 years. |
| Occupation, construction site          | 0.000002 | m <sup>2</sup> *a |                                                                                                              | Estimation. Not geography specific. Value and comment from "maize grain, feed production, GLO": Corresponds to land use Transformation*2 years (the length of the construction phase is 2 years).                                                                                                                                                                                                                                             |
| Occupation, industrial area, built up  | 0.000056 | m <sup>2</sup> *a |                                                                                                              | Estimation. Not geography specific. Value and comment from "maize grain, feed production, GLO": Corresponds to 0.2m <sup>2</sup> /tonne (because the total area occupied as "industrial area" was estimated as twice as high, namely 0.2 m <sup>2</sup> /tonne) multiplied by 3 months (because the average length of storage of the raw materials is set at 3 months in the calculations).                                                   |
| tap water                              | 0.000770 | kg                | market for tap water   tap water   Cutoff, U - BR                                                            | Average water use of two dry milling facilities in South Africa: a combined wheat & maize mill, and a dedicated wheat mill. Water is used to condition the wheat and is all absorbed by the                                                                                                                                                                                                                                                   |

|                                              |          |      |                                                                                                              |                                                                                                                                                                                                                                                                                                                                                                                                                 |
|----------------------------------------------|----------|------|--------------------------------------------------------------------------------------------------------------|-----------------------------------------------------------------------------------------------------------------------------------------------------------------------------------------------------------------------------------------------------------------------------------------------------------------------------------------------------------------------------------------------------------------|
|                                              |          |      |                                                                                                              | grain, i.e. no wastewater is produced (personal communication by mill operator).                                                                                                                                                                                                                                                                                                                                |
| Transformation, from unknown                 | 0.000001 | m2   |                                                                                                              | Estimation. Not geography specific. Value and comment from "maize grain, feed production, GLO": Corresponds to occupation industrial area/50 years (the lifetime of the storage silo was assumed to be 50 years).                                                                                                                                                                                               |
| Transformation, to industrial area, built up | 0.000001 | m2   |                                                                                                              | Estimation. Not geography specific. Value and comment from "maize grain, feed production, GLO": Corresponds to occupation industrial area/50 years (the lifetime of the storage silo was assumed to be 50 years).                                                                                                                                                                                               |
| transport, freight, lorry, unspecified       | 0.191400 | t*km | market for transport, freight, lorry, unspecified   transport, freight, lorry, unspecified   Cutoff, U - RoW | Transport distance based on US BTS Commodity Flow Surveys 1993, 1997, 2002, 2007, US Dep. Of Transportation, Bureau of Transportation Statistics. Of the total road transport, 6% is assumed to be by delivery van for goods with a large share of retail sale, and 3% for goods that are mainly sold via wholesale.                                                                                            |
| wheat grain                                  | 1.137322 | kg   | wheat production   wheat grain   Cutoff, U (copy) - BR                                                       | This figure represents wheat received at the gate of the dry milling plant to produce 1 kg milled wheat products. An average of 2% of wheat received is estimated to be reject material based on data from a single mill (value for combined bran and screenings produced). Maximum permissible levels of deviations (screenings, other grains and gravel, turf etcl) for all grades of wheat is 5%. Reference: |

|  |  |  |  |                                                                                                                                                                                                    |
|--|--|--|--|----------------------------------------------------------------------------------------------------------------------------------------------------------------------------------------------------|
|  |  |  |  | Department of Agriculture (2016). Regulations relating to the grading, packing and marking of bread wheat intended for sale in the Republic of South Africa. Government gazette, 29 January 20016. |
|--|--|--|--|----------------------------------------------------------------------------------------------------------------------------------------------------------------------------------------------------|

#### Outputs

| Flow        | Amount   | Unit | Provider | Description                                                                                                                                                                                                                                                                                                                                                                                                                                                                                                                                                                                                                                                                                                                                                                                                                       |
|-------------|----------|------|----------|-----------------------------------------------------------------------------------------------------------------------------------------------------------------------------------------------------------------------------------------------------------------------------------------------------------------------------------------------------------------------------------------------------------------------------------------------------------------------------------------------------------------------------------------------------------------------------------------------------------------------------------------------------------------------------------------------------------------------------------------------------------------------------------------------------------------------------------|
| Water       | 0.000024 | kg   |          | Calculated value: water balance over process. Assumed all water loss from wheat during the grinding process, which produces heat, is lost to air.                                                                                                                                                                                                                                                                                                                                                                                                                                                                                                                                                                                                                                                                                 |
| wheat flour | 1.000000 | kg   |          | <i>This product covers all grades of flour from the milling of wheat (cake flour, bread flour, whole wheat meal and semolina). The product fraction is calculated from the annual average output of products from dry milling for human consumption in South Africa reported by SAGIS (South African Grain Information Service) on a monthly basis (July 2015 - June 2016). Essentially all wheat in South Africa is milled to produce products for human consumption (cake flour, self-raising flour, white bread flour, brown bread flour, industrial flour, whole wheat meal and semolina), and bran, sold primarily as an animal feed. Less than 1% of wheat is milled for animal consumption. Reference(s): SAGIS (2016) Maize Products per Month Manufactured - July 2015 to June 2016, South African Grain Information</i> |

|  |  |  |  |                                                                                                          |
|--|--|--|--|----------------------------------------------------------------------------------------------------------|
|  |  |  |  | Service. Available at:<br><a href="http://www.sagis.org.za">www.sagis.org.za</a> . (Accessed April 2017) |
|--|--|--|--|----------------------------------------------------------------------------------------------------------|

### **Beer, regular (4-5° alcohol), at plant (AGB 3.0)**

*Description:* Inventory of AGRIBALYSE v3.0.1, 2020.

This dataset represent the production of one liter of bottled lager beer at pant in France.

The system covers all stages from raw material production and agricultural upstream to brewing process and bottling process (without packaging material) (cradle to gate). It is assumed to take place in France. Consequently, all datasets are chosen for France and Europe, when not available for France.

The downstream stages from plant gate to consumer are out of scope since they are already included in Agribalyse 3.0 database. The following stages are excluded from the system:

- o Packaging material: glass is already included in Agribalyse database,
- o Distribution and consumer transport downstream of the plant: already included in Agribalyse database.
- o Storage and cooling at retail and consumer: already included in Agribalyse database.

The figure represents the system modelling boundaries (exclusions are greyed).

\_ Beer recipes and manufacturing processes are very diversified in industrial and craft beer sectors. According to Canadian beverage database, the most consumed beers are lager, with 89,54 % market share during 2010 to 2014 (European Commission, 2018). It is assumed that a regular 4,5° alcohol by volume beer can be represented by lager beers. In this category, 40 % are full grain lager, meaning only malted barley is used as the cereal base, and 60 % are extract lager, which include barley malt extract and other cereals such as corn. Therefore, recipes for each lager beer type are averaged to represent the overall

beer market. Beer recipes are based on lager beers (full grain and extract) from Cambden BRI.

\_ For the plant process, data are mainly collected from PEFCR.

\_ The malting of barley grain is not included in any barley production dataset. It is also not part of the process at the brewery. Data from FAO gives the specific inventory for malting (FAO, 2009). Malting is supposed to take place in France. French electricity grid mix is considered.

Losses of barley in the malting process are not considered.

\_ Along the brewing process, energy as electricity and heat is required for brewing, temperature control during fermentation and bottling. Water is also needed as a recipe input, which is not indicated in the recipe from PEFCR (European Commission, 2018), as well as for cooling after brewing and cleaning equipments. Input data were collected from BREF study (European IPPC Bureau, 2019) and compared to other articles in the table below. Across the studies we consider, only BREF is complete. Moreover, quantities are the largest allowing conservative assumptions. However, data come from a wide range of primary sources geographically as well as temporally. Beer production is taking place in France. Electricity grid mix is adjusted to French context.

Losses of beer in the process are not considered. No water recycling considered.

\_Emissions to air and water and solid emissions are investigated in BREF study.

Emissions to air are not evaluated in the study. Apart from emissions from energy production already included in LCA datasets, emissions to air can be related to grain dust during transportation and transfer and to CO<sub>2</sub> emissions during fermentation. They are not quantified since they have negligible environmental and odor impact.

Emissions to water mostly result from organic compound discharged by ingredients during the brewing process. Water content in spent grain, later rejected to wastewater network, account for this organic load. Cleaning products account for lower organic emissions. Because of lack of data, water emissions are not evaluated. They are neglected in this model.



Solid emissions are described for a large-scale brewery in 2002.

\_According to Fillaudeau et al., spent grains, yeast surplus and other organic wastes resulting from the brewing process are destined to animal feed (Fillaudeau et al., 2006). In a conservative approach, allocation for outputs are not chosen. Solid emissions are assumed to be treated as municipal solid waste.

According to PEF Guidance on food losses, solid waste treatment is: 50% incineration, 25% composting, and 25% methanization.

Compared to the recipe, grain reject is consistent with the barley malt input. Yeast rehydration can explain a higher reject mass of surplus yeast than dry yeast input.

\_Supply of input material : According to PEFCR for beer (European Commission, 2018), ingredient supply is made by Transport, freight, lorry >32 metric ton, EURO4 {RER}| market for| Cut-off, S with a utilization rate of 50%. A 500 km distance is applied to all inputs. Therefore, datasets from Ecoinvent database will not be chosen as ""market for"".

\_Solid waste transport : Solid waste at the brewery are managed similarly to our hypotheses in Agribalyse 3.0 database.

Boundary with nature: Unspecified

Generator: Gingko 21 + Blonk Consultants

Inputs

| Flow Agribalyse 3.0.1                                               | Flow Ecoinvent 3.6                          | Amount | Unit | Provider                                                                                                    | Description                                    |
|---------------------------------------------------------------------|---------------------------------------------|--------|------|-------------------------------------------------------------------------------------------------------------|------------------------------------------------|
| Biowaste {GLO}  treatment of biowaste, municipal incineration - GLO | process-specific burdens, sanitary landfill | 0.0732 | kg   | process-specific burdens, sanitary landfill   process-specific burdens, sanitary landfill   Cutoff, U - RoW | Organic waste from brewing proces, Assumptions |

|                                                                                                                      |                                                   |          |    |                                                                                                                                      |                                                                                                                         |
|----------------------------------------------------------------------------------------------------------------------|---------------------------------------------------|----------|----|--------------------------------------------------------------------------------------------------------------------------------------|-------------------------------------------------------------------------------------------------------------------------|
| Biowaste {RoW} <br>treatment of<br>biowaste by<br>anaerobic<br>digestion   Cut-<br>off, S - Copied<br>from Ecoinvent | process-specific<br>burdens, sanitary<br>landfill | 0.0366   | kg | process-specific<br>burdens,<br>sanitary landfill<br>  process-<br>specific<br>burdens,<br>sanitary landfill<br>  Cutoff, U -<br>RoW | Organic waste from<br>brewing proces,<br>(European IPPC<br>Bureau, 2019)                                                |
| Biowaste {RoW} <br>treatment of<br>biowaste,<br>industrial<br>composting  <br>Cut-off, S - Copied<br>from Ecoinvent  | process-specific<br>burdens, sanitary<br>landfill | 0.0366   | kg | process-specific<br>burdens,<br>sanitary landfill<br>  process-<br>specific<br>burdens,<br>sanitary landfill<br>  Cutoff, U -<br>RoW | Organic waste from<br>brewing process,<br>Assumptions                                                                   |
| Calcium chloride<br>{RER}  soda<br>production,<br>solvay process -<br>RER                                            | calcium chloride                                  | 6.00E-05 | kg | market for<br>calcium<br>chloride  <br>calcium<br>chloride  <br>Cutoff, U - RoW                                                      | Brewing recipe -<br>brewing salts and pH<br>regulators, proxy for<br>calcium sulphate<br>(European<br>Commission, 2018) |
| Calcium chloride<br>{RER}  soda<br>production,<br>solvay process -<br>RER                                            | calcium chloride                                  | 5.00E-04 | kg | market for<br>calcium<br>chloride  <br>calcium<br>chloride  <br>Cutoff, U - RoW                                                      | Brewing recipe -<br>brewing salts and pH<br>regulators, proxy for<br>brewing salts<br>(European<br>Commission, 2018)    |
| Carbon dioxide,<br>liquid {RER} <br>production   Cut-<br>off, S - Copied                                             | carbon dioxide,<br>liquid                         | 1.25E-04 | kg | market for<br>carbon dioxide,<br>liquid   carbon<br>dioxide, liquid  <br>Cutoff, U - RoW                                             | Brewing recipe - hop<br>products (European<br>Commission, 2018)                                                         |

|                                                                                        |                             |          |     |                                                                                             |                                                                                           |
|----------------------------------------------------------------------------------------|-----------------------------|----------|-----|---------------------------------------------------------------------------------------------|-------------------------------------------------------------------------------------------|
| from Ecoinvent - RER                                                                   |                             |          |     |                                                                                             |                                                                                           |
| Diatomaceous earth, at plant/CH U (ACYVIA)                                             | diatomite                   | 6.60E-04 | kg  |                                                                                             | Brewing recipe - filter aids (European Commission, 2018)                                  |
| Electricity, medium voltage {FR}  market for   Cut-off, S - Copied from Ecoinvent - FR | electricity, medium voltage | 0.0165   | kWh | market group for electricity, medium voltage   electricity, medium voltage   Cutoff, U - BR | Malting process, (FAO, 2009)                                                              |
| Electricity, medium voltage {FR}  market for   Cut-off, S - Copied from Ecoinvent - FR | electricity, medium voltage | 0.536    | kWh | market group for electricity, medium voltage   electricity, medium voltage   Cutoff, U - BR | Brewing process, (European IPPC Bureau, 2019)                                             |
| Expanded perlite {RoW}  production   Cut-off, S - Copied from Ecoinvent                | expanded perlite            | 1.90E-04 | kg  | expanded perlite production   expanded perlite   Cutoff, U - RoW                            | Brewing recipe - filter aids (European Commission, 2018)                                  |
| Extraction of sugar, from sugar beet, processing/FR U                                  | sugar, from sugarcane       | 0.009    | kg  | sugarcane processing, modern annexed plant   sugar, from                                    | Brewing recipe - sugars, proxy: barley for high maltose syrup (European Commission, 2018) |

|                                                                                                                                                                   |                                                                       |          |    |                                                                                                                    |                                                                                 |
|-------------------------------------------------------------------------------------------------------------------------------------------------------------------|-----------------------------------------------------------------------|----------|----|--------------------------------------------------------------------------------------------------------------------|---------------------------------------------------------------------------------|
|                                                                                                                                                                   |                                                                       |          |    | sugarcane  <br>Cutoff, U - BR                                                                                      |                                                                                 |
| Heat, central or small-scale, natural gas {Europe without Switzerland}  market for heat, central or small-scale, natural gas   Cut-off, S - Copied from Ecoinvent | heat, central or small-scale, natural gas                             | 0.343    | MJ | market for heat, central or small-scale, natural gas   heat, central or small-scale, natural gas   Cutoff, U - RoW | Malting process, (FAO, 2009)                                                    |
| Heat, central or small-scale, natural gas {Europe without Switzerland}  market for heat, central or small-scale, natural gas   Cut-off, S - Copied from Ecoinvent | heat, central or small-scale, natural gas                             | 1.93     | MJ | market for heat, central or small-scale, natural gas   heat, central or small-scale, natural gas   Cutoff, U - RoW | Brewing process, (European IPPC Bureau, 2019)                                   |
| Hemp, grain, Champagne, at farm gate/FR U                                                                                                                         | No matching flows were found. The flow was not included. <sup>3</sup> | 2.00E-04 | kg |                                                                                                                    | Brewing recipe - hop products, proxy for hop pellet (European Commission, 2018) |

---

<sup>3</sup> An estimation of GHG emissions related to the beer production conducted through the Agribalyse Database, with CML-IA baseline as the LCIA method, showed that the flows which were not included in the adaption to Ecoinvent have minor effect in the GWP-100a category (check Figure x).

|                                                                                                                                                           |                                                          |          |    |                                                                                                                             |                                                                                  |
|-----------------------------------------------------------------------------------------------------------------------------------------------------------|----------------------------------------------------------|----------|----|-----------------------------------------------------------------------------------------------------------------------------|----------------------------------------------------------------------------------|
| Maize starch, at farm gate/FR U                                                                                                                           | maize starch                                             | 0.012    | kg | maize starch production   maize starch   Cutoff, U - RoW                                                                    | Brewing recipe - raw cereals, proxy for maize flake (European Commission, 2018)  |
| Nitric acid, without water, in 50% solution state {RER}  nitric acid production, product in 50% solution state   Cut-off, S - Copied from Ecoinvent - RER | nitric acid, without water, in 50% solution state        | 0.00205  | kg | nitric acid production, product in 50% solution state   nitric acid, without water, in 50% solution state   Cutoff, U - RoW | Brewing recipe - cleansers (European Commission, 2018)                           |
| Peracetic acid, at plant/RER U (ACYVIA)                                                                                                                   | Peracetic acid                                           | 2.00E-05 | kg |                                                                                                                             | Brewing recipe - cleansers, proxy for peracetic acid (European Commission, 2018) |
| Polydimethylsiloxane {GLO}  polydimethylsiloxane production   Cut-off, S - Copied from Ecoinvent - GLO                                                    | polydimethylsiloxane                                     | 6.00E-05 | kg | polydimethylsiloxane production   polydimethylsiloxane   Cutoff, U - GLO                                                    | Brewing recipe - antifoam (European Commission, 2018)                            |
| Polyvinylpolypyrrolidone (PVPP), at plant/RER U (ACYVIA)                                                                                                  | No matching flows were found. The flow was not included. | 2.00E-05 | kg |                                                                                                                             | Brewing recipe - filter aids (European Commission, 2018)                         |
| Silica sand {RoW}  production   Cut-                                                                                                                      | silica sand                                              | 1.20E-05 | kg | silica sand production   silica sand   Cutoff, U - RoW                                                                      | Brewing recipe - filter aids (European Commission, 2018)                         |

|                                                                                                                               |                                                           |          |    |                                                                                                                                                    |                                                                                       |
|-------------------------------------------------------------------------------------------------------------------------------|-----------------------------------------------------------|----------|----|----------------------------------------------------------------------------------------------------------------------------------------------------|---------------------------------------------------------------------------------------|
| off, S - Copied from Ecoinvent                                                                                                |                                                           |          |    |                                                                                                                                                    |                                                                                       |
| Sodium hydroxide, without water, in 50% solution state {GLO}  market for   Cut-off, S - Copied from Ecoinvent - GLO           | sodium hydroxide, without water, in 50% solution state    | 0.00509  | kg | market for sodium hydroxide, without water, in 50% solution state   sodium hydroxide, without water, in 50% solution state   Cutoff, U - GLO       | Brewing recipe - cleansers (European Commission, 2018)                                |
| Sodium hypochlorite, without water, in 15% solution state {GLO}  market for   Cut-off, S - Copied from Ecoinvent - GLO        | sodium hypochlorite, without water, in 15% solution state | 1.00E-07 | kg | market for sodium hypochlorite, without water, in 15% solution state   sodium hypochlorite, without water, in 15% solution state   Cutoff, U - RoW | Brewing recipe - cleansers (European Commission, 2018)                                |
| Steel, chromium steel 18/8 {RER}  steel production, converter, chromium steel 18/8   Cut-off, S - Copied from Ecoinvent - RER | steel, chromium steel 18/8                                | 1.00E-06 | kg | steel production, electric, chromium steel 18/8   steel, chromium steel 18/8   Cutoff, U - RoW                                                     | Brewing recipe - filter aids, proxy for cartridge filters (European Commission, 2018) |
| Tap water {RER}  market group for   Cut-off, U -                                                                              | tap water                                                 | 0.889    | kg | market for tap water   tap                                                                                                                         | Malting process, (FAO, 2009)                                                          |

|                                                                                                                                                                                   |                                                                                                                          |         |       |                                                                                                                                                               |                                                                                                          |
|-----------------------------------------------------------------------------------------------------------------------------------------------------------------------------------|--------------------------------------------------------------------------------------------------------------------------|---------|-------|---------------------------------------------------------------------------------------------------------------------------------------------------------------|----------------------------------------------------------------------------------------------------------|
| Copied from<br>Ecoinvent - RER                                                                                                                                                    |                                                                                                                          |         |       | water   Cutoff,<br>U - BR                                                                                                                                     |                                                                                                          |
| Tap water {RER} <br>market group for<br>  Cut-off, U -<br>Copied from<br>Ecoinvent - RER                                                                                          | tap water                                                                                                                | 6       | kg    | market for tap<br>water   tap<br>water   Cutoff,<br>U - BR                                                                                                    | Brewing process,<br>(European IPPC<br>Bureau, 2019)                                                      |
| Transport,<br>freight, lorry 16-<br>32 metric ton,<br>EURO4 {RER} <br>transport, freight,<br>lorry 16-32<br>metric ton,<br>EURO4   Cut-off,<br>S - Copied from<br>Ecoinvent - RER | transport, freight,<br>lorry 16-32<br>metric ton,<br>EURO4                                                               | 0.00264 | t*km  | market for<br>transport,<br>freight, lorry<br>16-32 metric<br>ton, EURO4  <br>transport,<br>freight, lorry<br>16-32 metric<br>ton, EURO4  <br>Cutoff, U - RoW | Transport, solid<br>waste emission from<br>brewery to end of<br>life treatment<br>facility Assumptions   |
| Transport,<br>freight, lorry >32<br>metric ton,<br>EURO4 {RER} <br>transport, freight,<br>lorry >32 metric<br>ton, EURO4   Cut-<br>off, S - Copied<br>from Ecoinvent -<br>RER     | transport, freight,<br>lorry >32 metric<br>ton, EURO4                                                                    | 0.0849  | t*km  | market for<br>transport,<br>freight, lorry<br>>32 metric ton,<br>EURO4  <br>transport,<br>freight, lorry<br>>32 metric ton,<br>EURO4   Cutoff,<br>U - RoW     | Transport, supply of<br>ingredients from<br>production site to<br>brewery (European<br>Commission, 2018) |
| Transport,<br>freight, lorry with<br>refrigeration<br>machine, 7.5-16<br>ton, EURO5,<br>R134a<br>refrigerant,<br>cooling {GLO}                                                    | transport, freight,<br>lorry with<br>refrigeration<br>machine, 7.5-16<br>ton, EURO5,<br>R134a<br>refrigerant,<br>cooling | 675     | kg*km | market for<br>transport,<br>freight, lorry<br>with<br>refrigeration<br>machine, 7.5-16<br>ton, EURO5,<br>R134a                                                | Transport to<br>distribution,<br>includes mass of<br>packaging material                                  |

|                                                                                                                                                |                                                          |         |    |                                                                                                                                              |                                                                                  |
|------------------------------------------------------------------------------------------------------------------------------------------------|----------------------------------------------------------|---------|----|----------------------------------------------------------------------------------------------------------------------------------------------|----------------------------------------------------------------------------------|
| transport, freight, lorry with refrigeration machine, 7.5-16 ton, EURO5, R134a refrigerant, cooling   Cut-off, S - Copied from Ecoinvent - GLO |                                                          |         |    | refrigerant, cooling   transport, freight, lorry with refrigeration machine, 7.5-16 ton, EURO5, R134a refrigerant, cooling   Cutoff, U - GLO |                                                                                  |
| Wastewater, average {Europe without Switzerland}  market for wastewater, average   Cut-off, S - Copied from Ecoinvent                          | wastewater, average                                      | 0.00589 | m3 | treatment of wastewater, average, capacity 1E9l/year   wastewater, average   Cutoff, U - RoW                                                 | Malting and brewing wastewater, (European IPPC Bureau, 2019)                     |
| Wheat starch, from wheat starch extraction, at plant/FR U                                                                                      | No matching flows were found. The flow was not included. | 0.012   | kg |                                                                                                                                              | Brewing recipe - raw cereals, proxy for barley flake (European Commission, 2018) |
| Winter barley, conventional, malting quality, animal feed, at farm gate/FR U                                                                   | barley grain, feed                                       | 0.127   | kg | barley grain, feed production   barley grain, feed   Cutoff, U (copy) - BR                                                                   | Brewing process - malted cereals, (European Commission, 2018)                    |
| Winter barley, conventional, malting quality,                                                                                                  | barley grain, feed                                       | 0.009   | kg | barley grain, feed production   barley grain,                                                                                                | Brewing recipe - sugars, proxy: barley for high maltose                          |



|                                                                              |                                                          |          |    |                                                                  |                                                              |
|------------------------------------------------------------------------------|----------------------------------------------------------|----------|----|------------------------------------------------------------------|--------------------------------------------------------------|
| animal feed, at farm gate/FR U                                               |                                                          |          |    | feed   Cutoff, U (copy) - BR                                     | syrup (European Commission, 2018)                            |
| Yeast, at plant/RER U (ACYVIA)                                               | No matching flows were found. The flow was not included. | 1.60E-04 | kg |                                                                  | Brewing recipe - processing aids (European Commission, 2018) |
| Zinc monosulfate {RER}  production   Cutoff, S - Copied from Ecoinvent - RER | zinc monosulfate                                         | 4.00E-07 | kg | market for zinc monosulfate   zinc monosulfate   Cutoff, U - RoW | Brewing recipe - yeast foods (European Commission, 2018)     |

#### Outputs

| Flow                                        | Flow Ecoinvent 3.6 | Amount | Unit | Provider | Description                                                                                  |
|---------------------------------------------|--------------------|--------|------|----------|----------------------------------------------------------------------------------------------|
| Beer, regular (4-5° alcohol), at plant/FR U | Beer, regular      | 1      | kg   |          | Production of 1 liter of bottled beer (density=1) at plant. Bottle packaging is not included |

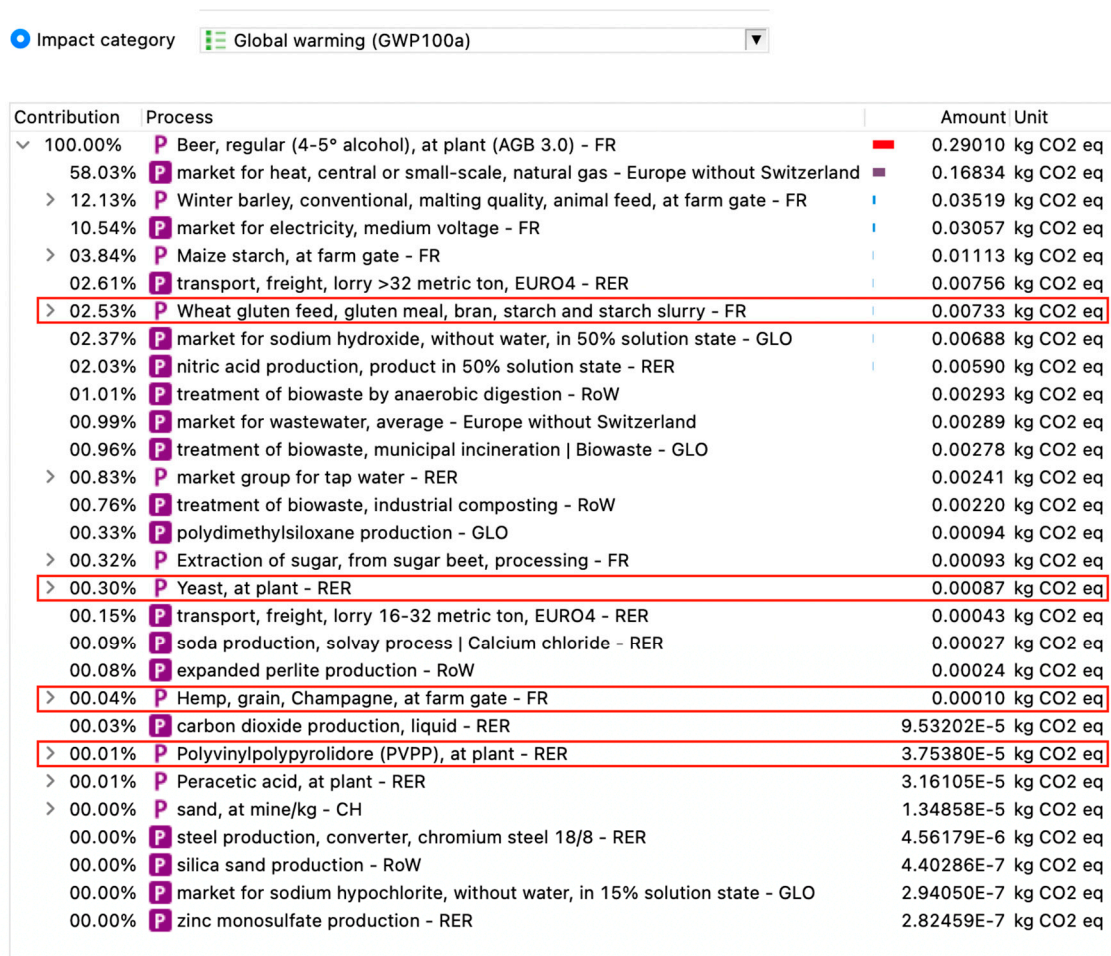

Figure 1: Contribution tree for the process Beer, regular (4-5° alcohol), at plant (AGB 3.0). Calculated in OpenLCA with the Agribalyse 3.0.1 database.

## Orange juice; industrial production; at plant; NFC; 1L (AGB 3.0)

**Description:** This process describe the production of orange juice (not concentrated) from oranges. Energy use for bottling and for concentrating juice are not accounted for. For additional information, please refer to the Agribalyse 3.0 methodological report. Boundary with nature: Unspecified

Record: Aurore Wermeille - Sayari

aurore.wermeille@sayari.co

Generator: Sayari - Blonk Consultants

Inputs

| Flow Agribalyse 3.0.1                                                                                                                                                                                    | Flow Ecoinvent 3.6                                      | Amount       | Unit | Provider                                                                                                                                          | Description |
|----------------------------------------------------------------------------------------------------------------------------------------------------------------------------------------------------------|---------------------------------------------------------|--------------|------|---------------------------------------------------------------------------------------------------------------------------------------------------|-------------|
| Biowaste {RoW} <br>market for   Cut-off, S -<br>Copied from Ecoinvent                                                                                                                                    | biowaste                                                | 1.29         | kg   | market for biowaste  <br>biowaste   Cutoff, U - RoW                                                                                               |             |
| Electricity, medium<br>voltage {FR}  market for<br>  Cut-off, S - Copied<br>from Ecoinvent - FR                                                                                                          | electricity, medium<br>voltage                          | 0.321        | MJ   | market group for<br>electricity, medium voltage<br>  electricity, medium<br>voltage   Cutoff, U - BR                                              |             |
| Generic detergent-<br>disinfectant, at<br>plant/RER U (ACYVIA)                                                                                                                                           | Generic detergent-<br>disinfectant, at<br>plant         | 0.0089       | kg   | Generic detergent-<br>disinfectant, at plant - BR                                                                                                 |             |
| Heat, district or<br>industrial, natural gas<br>{Europe without<br>Switzerland}  heat<br>production, natural gas,<br>at industrial furnace<br>low-NOx >100kW   Cut-<br>off, S - Copied from<br>Ecoinvent | heat, district or<br>industrial, natural<br>gas         | 0.0174       | MJ   | market for heat, district or<br>industrial, natural gas  <br>heat, district or industrial,<br>natural gas   Cutoff, U -<br>RoW                    |             |
| Nitric acid, without<br>water, in 50% solution<br>state {GLO}  market for<br>  Cut-off, S - Copied<br>from Ecoinvent - GLO                                                                               | nitric acid, without<br>water, in 50%<br>solution state | 3.00E-<br>04 | kg   | market for nitric acid,<br>without water, in 50%<br>solution state   nitric acid,<br>without water, in 50%<br>solution state   Cutoff, U -<br>RoW |             |

|                                                                                                                                                                                                                                                           |                                                                                                     |        |       |                                                                                                                                                                                                                                        |  |
|-----------------------------------------------------------------------------------------------------------------------------------------------------------------------------------------------------------------------------------------------------------|-----------------------------------------------------------------------------------------------------|--------|-------|----------------------------------------------------------------------------------------------------------------------------------------------------------------------------------------------------------------------------------------|--|
| Orange, consumption mix/FR U                                                                                                                                                                                                                              | orange, processing grade                                                                            | 2.29   | kg    | orange production, processing grade   orange, processing grade   Cutoff, U (copy) - BR                                                                                                                                                 |  |
| Tap water {GLO}  market group for   Cut-off, S - Copied from Ecoinvent - GLO                                                                                                                                                                              | tap water                                                                                           | 5.1    | kg    | market for tap water   tap water   Cutoff, U - BR                                                                                                                                                                                      |  |
| Transport, freight, lorry with refrigeration machine, 7.5-16 ton, EURO5, R134a refrigerant, cooling {GLO}  transport, freight, lorry with refrigeration machine, 7.5-16 ton, EURO5, R134a refrigerant, cooling   Cut-off, S - Copied from Ecoinvent - GLO | Transport, freight, lorry with refrigeration machine, 7.5-16 ton, EURO5, R134a refrigerant, cooling | 495    | kg*km | market for transport, freight, lorry with refrigeration machine, 7.5-16 ton, EURO5, R134a refrigerant, cooling   transport, freight, lorry with refrigeration machine, 7.5-16 ton, EURO5, R134a refrigerant, cooling   Cutoff, U - GLO |  |
| Treatment, sewage, to wastewater treatment/CH U (ACYVIA)                                                                                                                                                                                                  | wastewater, average                                                                                 | 0.0051 | m3    | treatment of wastewater, average, capacity 1E9l/year   wastewater, average   Cutoff, U - RoW                                                                                                                                           |  |

#### Outputs

| Flow Agribalyse 3.0.1 | Flow Ecoinvent 3.6 | Amount | Unit | Provider | Description |
|-----------------------|--------------------|--------|------|----------|-------------|
|-----------------------|--------------------|--------|------|----------|-------------|

|                                                             |  |   |    |  |  |
|-------------------------------------------------------------|--|---|----|--|--|
| Orange juice; industrial production; at plant; NFC; 1L/FR U |  | 1 | kg |  |  |
|-------------------------------------------------------------|--|---|----|--|--|

### Generic detergent-disinfectant, at plant

Inputs

| Flow Agribalyse 3.0.1                                                                                          | Flow Ecoinvent 3.6                                | Amount | Unit | Provider                                                                                                                           | Description |
|----------------------------------------------------------------------------------------------------------------|---------------------------------------------------|--------|------|------------------------------------------------------------------------------------------------------------------------------------|-------------|
| Acetic acid, without water, in 98% solution state {GLO}  market for   Cut-off, S - Copied from Ecoinvent - GLO | acetic acid, without water, in 98% solution state | 0.07   | kg   | market for acetic acid, without water, in 98% solution state   acetic acid, without water, in 98% solution state   Cutoff, U - GLO |             |
| Chemical, organic {GLO}  market for   Cut-off, S - Copied from Ecoinvent - GLO                                 | Chemical, organic                                 | 0.05   | kg   | market for chemical, organic   chemical, organic   Cutoff, U - GLO                                                                 |             |

|                                                                                                                                                                    |                                                         |      |    |                                                                                                                                                |  |
|--------------------------------------------------------------------------------------------------------------------------------------------------------------------|---------------------------------------------------------|------|----|------------------------------------------------------------------------------------------------------------------------------------------------|--|
| Hydrogen peroxide, without water, in 50% solution state {GLO}  market for   Cut-off, S - Copied from Ecoinvent - GLO                                               | Hydrogen peroxide, without water, in 50% solution state | 0.14 | kg | market for hydrogen peroxide, without water, in 50% solution state   hydrogen peroxide, without water, in 50% solution state   Cutoff, U - RoW |  |
| Water, deionised, from tap water, at user {Europe without Switzerland}  market for water, deionised, fro'm tap water, at user   Cut-off, S - Copied from Ecoinvent | Water, deionised                                        | 0.74 | kg | market for water, deionised   water, deionised   Cutoff, U - RoW                                                                               |  |

#### Outputs

| Flow Agribalyse 3.0.1                                   | Flow Ecoinvent 3.6                       | Amount | Unit | Provider | Description |
|---------------------------------------------------------|------------------------------------------|--------|------|----------|-------------|
| Generic detergent-disinfectant, at plant/RER U (ACYVIA) | Generic detergent-disinfectant, at plant | 1      | kg   |          |             |

**Cola, with sugar and artificial sweetener(s), processed in FR | Chilled  
| PET | at distribution**

*Description:* Inventory of AGRIBALYSE v3.0.1, 2020

This database has been produced as part of AGRIBALYSE program lead by ADEME and INRAE since 2009. It contains agricultural and food products produced and/or consumed in France. It follows CIQUAL nomenclature, the French nutritional database. AGRIBALYSEv3.0 is built upon previous work and datasets, in particular AGRIBALYSE v1.3 and v1.4 (French agricultural products); ACYVIA (food transformation), Ecoinvent v3.5 (imported products + non-food-datasets) and WFLDB v3.1 (imported products). Methodology principles follow the key international guidelines as much as possible (ISO, LEAP, PEF). All details and documentation available on [www.agribalyse.fr](http://www.agribalyse.fr)<<http://www.agribalyse.fr>>.

Propriété : ADEME

Générateur : Gingko 21, Sayari, Blonk Consultants.

Vérificateurs : RIVM, GreenDelta, Koch Consulting.

Property rights : OpenData, licence ""Ecolab"".

Contact : [agribalyse@ademe.fr](mailto:agribalyse@ademe.fr)

Status: Finished

Boundary with nature: Unspecified

Inputs

| Flow Agribalyse 3.0.4                                                             | Flow Ecoinvent 3.6                                    | Amount | Unit | Provider                                                                            | Description                             |
|-----------------------------------------------------------------------------------|-------------------------------------------------------|--------|------|-------------------------------------------------------------------------------------|-----------------------------------------|
| Extrusion of plastic sheets and thermoforming, inline {FR}  processing   Cut-off, | extrusion of plastic sheets and thermoforming, inline | 0.05   | kg   | extrusion of plastic sheets and thermoforming, inline   extrusion of plastic sheets | Extrusion of plastic packaging material |

|                                                                                                                  |                                                     |      |    |                                                                                                                                              |                                           |
|------------------------------------------------------------------------------------------------------------------|-----------------------------------------------------|------|----|----------------------------------------------------------------------------------------------------------------------------------------------|-------------------------------------------|
| S - Copied from Ecoinvent - FR                                                                                   |                                                     |      |    | and thermoforming, inline   Cutoff, U - RoW                                                                                                  |                                           |
| Impact extrusion of aluminium, deformation stroke {RER}  processing   Cut-off, S - Copied from Ecoinvent - RER   | Impact extrusion of aluminium, deformation stroke   | 0.05 | kg | impact extrusion of aluminium, deformation stroke   impact extrusion of aluminium, deformation stroke   Cutoff, U - RoW                      | Extrusion of aluminium packaging material |
| Impact extrusion of steel, cold, deformation stroke {RER}  processing   Cut-off, S - Copied from Ecoinvent - RER | Impact extrusion of steel, cold, deformation stroke | 0.05 | kg | impact extrusion of steel, cold, deformation stroke   impact extrusion of steel, cold, deformation stroke   Cutoff, U - RoW                  | Extrusion of steel packaging material     |
| Lemonade, with sugar, at plant/FR U                                                                              | Lemonade, with sugar                                | 1    | kg | Lemonade, with sugar, at plant - BR                                                                                                          | No losses assumed at packaging            |
| Polyethylene terephthalate, granulate, bottle grade {RER}  production   Cut-off, S - Copied from Ecoinvent - RER | Polyethylene terephthalate, granulate, bottle grade | 0.05 | kg | polyethylene terephthalate, granulate, bottle grade, recycled to generic market for bottle grade PET granulate   polyethylene terephthalate, | PET for packaging material                |



|                                                                                                                                                                 |                                                   |      |       |                                                                                                                                    |                                                                                                                         |
|-----------------------------------------------------------------------------------------------------------------------------------------------------------------|---------------------------------------------------|------|-------|------------------------------------------------------------------------------------------------------------------------------------|-------------------------------------------------------------------------------------------------------------------------|
|                                                                                                                                                                 |                                                   |      |       | granulate, bottle grade   Cutoff, U - CH                                                                                           |                                                                                                                         |
| Transport, freight train {RER}  market group for transport, freight train   Cutoff, S - Copied from Ecoinvent - RER                                             | Transport, freight train                          | 14   | kg*km | market for transport, freight train   transport, freight train   Cutoff, U - RoW                                                   | Transport of all packaging materials (39 km for glass, 280 km for all other materials), based on PEF guidance document  |
| Transport, freight, inland waterways, barge {RER}  processing - RER                                                                                             | Transport, freight, inland waterways, barge       | 18   | kg*km | market for transport, freight, inland waterways, barge   transport, freight, inland waterways, barge   Cutoff, U - RoW             | Transport of all packaging materials (87 km for glass, 360 km for all other materials), based on PEF guidance document  |
| Transport, freight, lorry 16-32 metric ton, euro6 {RER}  market for transport, freight, lorry 16-32 metric ton, EURO6   Cutoff, S - Copied from Ecoinvent - RER | transport, freight, lorry 16-32 metric ton, EURO6 | 11.5 | kg*km | market for transport, freight, lorry 16-32 metric ton, EURO6   transport, freight, lorry 16-32 metric ton, EURO6   Cutoff, U - RoW | Transport of all packaging materials (350 km for glass, 230 km for all other materials), based on PEF guidance document |

|                                                                                                                                                                                                                                                           |                                                                                                     |       |       |                                                                                                                                                                                                                                        |                                                                |
|-----------------------------------------------------------------------------------------------------------------------------------------------------------------------------------------------------------------------------------------------------------|-----------------------------------------------------------------------------------------------------|-------|-------|----------------------------------------------------------------------------------------------------------------------------------------------------------------------------------------------------------------------------------------|----------------------------------------------------------------|
| Transport, freight, lorry with refrigeration machine, 7.5-16 ton, EURO5, R134a refrigerant, cooling {GLO}  transport, freight, lorry with refrigeration machine, 7.5-16 ton, EURO5, R134a refrigerant, cooling   Cut-off, S - Copied from Ecoinvent - GLO | Transport, freight, lorry with refrigeration machine, 7.5-16 ton, EURO5, R134a refrigerant, cooling | 472.5 | kg*km | market for transport, freight, lorry with refrigeration machine, 7.5-16 ton, EURO5, R134a refrigerant, cooling   transport, freight, lorry with refrigeration machine, 7.5-16 ton, EURO5, R134a refrigerant, cooling   Cutoff, U - GLO | Transport to distribution, includes mass of packaging material |
|-----------------------------------------------------------------------------------------------------------------------------------------------------------------------------------------------------------------------------------------------------------|-----------------------------------------------------------------------------------------------------|-------|-------|----------------------------------------------------------------------------------------------------------------------------------------------------------------------------------------------------------------------------------------|----------------------------------------------------------------|

#### Outputs

| Flow Agribalyse 3.0.4                                                                           | Flow Ecoinvent 3.6 | Amount | Unit | Provider | Description |
|-------------------------------------------------------------------------------------------------|--------------------|--------|------|----------|-------------|
| Cola, with sugar and artificial sweetener(s), processed in FR   Chilled   PET   at packaging/FR |                    | 1      | kg   |          |             |

### Lemonade, with sugar, at plant

#### Inputs

| Flow Agrbalyse<br>3.0.1                | Flow Ecoinvent 3.6                  | Amount | Unit | Provider                                                                            | Description |
|----------------------------------------|-------------------------------------|--------|------|-------------------------------------------------------------------------------------|-------------|
| Lemon juice, pure juice, at plant/FR U | Orange juice; industrial production | 0.127  | kg   | Orange juice; industrial production - BR                                            |             |
| Water, municipal/FR U                  | tap water                           | 0.779  | kg   | market for tap water   tap water   Cutoff, U - BR                                   |             |
| White sugar, production, at plant/FR U | sugar, from sugarcane               | 0.0866 | kg   | sugarcane processing, modern annexed plant   sugar, from sugarcane   Cutoff, U - BR |             |

#### Outputs

| Flow Agrbalyse<br>3.0.1             | Flow Ecoinvent 3.6 | Amount | Unit | Provider | Description                                                                   |
|-------------------------------------|--------------------|--------|------|----------|-------------------------------------------------------------------------------|
| Lemonade, with sugar, at plant/FR U |                    | 1      | kg   |          | The CIQUAL food item 'Lemonade, with sugar' matches with a recipe from ANSES. |

### **Bolognese-style pasta (spaghetti, tagliatelle...), at plant**

*Description:* Inventory of AGRIBALYSE v3.0.1, 2020.

The CIQUAL food item 'Bolognese-style pasta (spaghetti, tagliatelle...)' matches with a recipe from ANSES. Boundary with nature: Unspecified

## Inputs

| Flow Agribalyse                                  | Flow Ecoinvent                                           | Amount | Unit | Provider                                                                                                 | Description |
|--------------------------------------------------|----------------------------------------------------------|--------|------|----------------------------------------------------------------------------------------------------------|-------------|
| Butter, unsalted, at dairy/FR U                  | butter, from cow milk                                    | 0.0262 | kg   | butter production, from cow milk   butter, from cow milk   Cutoff, U (copy) - BR                         |             |
| Carrot, peeled, at processing/FR U               | carrot                                                   | 0.0237 | kg   | carrot production   carrot   Cutoff, U (copy) - BR                                                       |             |
| Cooking, industrial, 1kg of cooked product/ FR U | Gas boiling, industrial, 1kg of boiled product (created) | 1      | kg   | Gas boiling, industrial, 1kg of boiled product, for boiling - BR (created)                               |             |
| Emmental cheese, from cow's milk, at plant/FR U  | cheese, from cow milk, fresh, unripened                  | 0.0786 | kg   | cheese production, soft, from cow milk   cheese, from cow milk, fresh, unripened   Cutoff, U (copy) - BR |             |
| Ground beef, fresh, for processing/FR U          | cattle for slaughtering, live weight                     | 0.087  | kg   | market for cattle for slaughtering, live weight   cattle for slaughtering, live weight   Cutoff, U - BR  |             |

|                                                                                                                                           |                                                                                                     |        |       |                                                                                                        |                                                                |
|-------------------------------------------------------------------------------------------------------------------------------------------|-----------------------------------------------------------------------------------------------------|--------|-------|--------------------------------------------------------------------------------------------------------|----------------------------------------------------------------|
| Olive oil, at plant/FR U                                                                                                                  | soybean oil, refined                                                                                | 0.0101 | kg    | soybean oil refinery operation   soybean oil, refined   Cutoff, U (copy, IGES) - BR                    |                                                                |
| Onions, peeled, at processing/FR U                                                                                                        | onion                                                                                               | 0.0223 | kg    | onion production   onion   Cutoff, U (copy) - BR                                                       |                                                                |
| Pasta, dried, from durum wheat, at plant/FR U                                                                                             | Pasta, dried, from durum wheat (created)                                                            | 0.472  | kg    | Pasta, dried, from durum wheat, at plant - BR (created)                                                |                                                                |
| Semi-skimmed milk, at plant/FR U                                                                                                          | skimmed milk, from cow milk                                                                         | 0.137  | kg    | butter production, from cream, from cow milk   skimmed milk, from cow milk   Cutoff, U (copy) - BR     |                                                                |
| Tomato, for processing, peeled, at plant/FR U                                                                                             | tomato, fresh grade                                                                                 | 0.134  | kg    | tomato production, fresh grade, open field   tomato, fresh grade   Cutoff, U (copy) - BR               |                                                                |
| Transport, freight, lorry with refrigeration machine, 7.5-16 ton, EURO5, R134a refrigerant, cooling {GLO}  transport, freight, lorry with | Transport, freight, lorry with refrigeration machine, 7.5-16 ton, EURO5, R134a refrigerant, cooling | 472.5  | kg*km | market for transport, freight, lorry with refrigeration machine, 7.5-16 ton, EURO5, R134a refrigerant, | Transport to distribution, includes mass of packaging material |

|                                                                                                                 |           |       |    |                                                                                                                                 |  |
|-----------------------------------------------------------------------------------------------------------------|-----------|-------|----|---------------------------------------------------------------------------------------------------------------------------------|--|
| refrigeration machine, 7.5-16 ton, EURO5, R134a refrigerant, cooling   Cut-off, S - Copied from Ecoinvent - GLO |           |       |    | cooling   transport, freight, lorry with refrigeration machine, 7.5-16 ton, EURO5, R134a refrigerant, cooling   Cutoff, U - GLO |  |
| Water, municipal/FR U                                                                                           | tap water | 0.243 | kg | market for tap water   tap water   Cutoff, U - BR                                                                               |  |

#### Outputs

| Flow Agribalyse                                                         | Flow Ecoinvent | Amount | Unit | Provider | Description                                                                                                       |
|-------------------------------------------------------------------------|----------------|--------|------|----------|-------------------------------------------------------------------------------------------------------------------|
| <i>Bolognese-style pasta (spaghetti, tagliatelle...), at plant/FR U</i> |                | 1      | kg   |          | <i>The CIQUAL food item 'Bolognese-style pasta (spaghetti, tagliatelle...)' matches with a recipe from ANSES.</i> |
| Water                                                                   | water          | 0.287  | kg   |          | Water evaporated                                                                                                  |

### **Durum wheat, semolina, at plant (WFLDB 3.1)**

*Description:* Included processes: This multi-output process covers the production of durum wheat semolina and co-products (mainly bran). The inventory includes the inputs of wheat, energy, water and land occupied by the factory. Transport of wheat to the factory is

included. Wastes (losses) composting is considered (empty ""dummy"" dataset for composting because of the cut-off allocation method). Packaging is not included.

Remark: The functional unit is the production of 1 kg of durum wheat semolina. The production system is based on an Italian mill producing 68'000 tonnes semolina/year. Allocation between co-products is based on their economical value with the following allocation factors:

- semolina: 88.6%
- co-products (bran): 11.4%

PEF-Quality: data quality rating (DQR) = 2.2 ( i.e. good quality)

Boundary with nature: Unspecified

Record: Data entry by: Cécile Guignard

Telephone: 0041 21 693 91 92; E-mail: cecile.guignard@quantis-intl.com; Company: Quantis; Country: CH

Generator: Generator/publicator: Quantis, WFLDB team

Telephone: 0041 21 693 91 92; E-mail: xavier.bengoa@quantis-intl.com; Company: Quantis; Country: CH

Inputs

| Flow<br>Agribalyse | Flow<br>Ecoinvent | Amount | Unit | Provider | Description |
|--------------------|-------------------|--------|------|----------|-------------|
|--------------------|-------------------|--------|------|----------|-------------|

|                                                                                                                                                                                       |                                                 |             |     |                                                                                                                                                           |                                                                                                                               |
|---------------------------------------------------------------------------------------------------------------------------------------------------------------------------------------|-------------------------------------------------|-------------|-----|-----------------------------------------------------------------------------------------------------------------------------------------------------------|-------------------------------------------------------------------------------------------------------------------------------|
| Biowaste<br>{CH} <br>treatment of<br>biowaste,<br>industrial<br>composting -<br>CH                                                                                                    | biowaste                                        | 0.014705882 | kg  | treatment of<br>biowaste,<br>industrial<br>composting<br>  biowaste  <br>Cutoff, U -<br>RoW                                                               | (1,4,3,1,1,5)                                                                                                                 |
| Building, hall<br>{CH} <br>construction<br>  Cut-off, S -<br>Copied from<br>Ecoinvent -<br>CH                                                                                         | building, hall                                  | 8.38235E-05 | m2  | building<br>construction,<br>hall  <br>building, hall<br>  Cutoff, U -<br>RoW                                                                             | (5,4,3,1,4,na) Infrastructure:<br>size of the building assumed to<br>correspond to the industrial<br>area, lifetime: 50 years |
| Electricity,<br>low voltage<br>{RER} <br>market group<br>for   Cut-off,<br>S - Copied<br>from<br>Ecoinvent -<br>RER                                                                   | Electricity, low<br>voltage                     | 0.000852941 | MWh | market<br>group for<br>electricity,<br>low voltage<br>  electricity,<br>low voltage<br>  Cutoff, U -<br>BR                                                | (1,4,3,1,1,5)                                                                                                                 |
| Heat, central<br>or small-<br>scale, natural<br>gas {Europe<br>without<br>Switzerland} <br>heat<br>production,<br>natural gas,<br>at boiler<br>modulating<br><100kW  <br>Cut-off, S - | Heat, central<br>or small-scale,<br>natural gas | 0.114705882 | MJ  | heat<br>production,<br>natural gas,<br>at boiler<br>modulating<br><100kW  <br>heat, central<br>or small-<br>scale,<br>natural gas  <br>Cutoff, U -<br>RoW | (1,4,3,1,1,5)                                                                                                                 |



|                                                                                                                                                                     |                                                            |             |      |                                                                                                                                          |               |
|---------------------------------------------------------------------------------------------------------------------------------------------------------------------|------------------------------------------------------------|-------------|------|------------------------------------------------------------------------------------------------------------------------------------------|---------------|
| Copied from<br>Ecoinvent                                                                                                                                            |                                                            |             |      |                                                                                                                                          |               |
| Occupation,<br>industrial<br>area, built up                                                                                                                         | Occupation,<br>industrial area,<br>built up                | 0.004191176 | m2*a |                                                                                                                                          | (1,4,3,1,1,5) |
| Spring wheat<br>grain, at farm<br>(WFLDB<br>3.1)/CA U                                                                                                               | wheat grain                                                | 0.001323529 | t    | wheat<br>production  <br>wheat grain<br>  Cutoff, U<br>(copy) - BR                                                                       | (1,4,3,1,1,5) |
| Tap water<br>{RER} <br>market group<br>for   Cut-off,<br>U - Copied<br>from<br>Ecoinvent -<br>RER                                                                   | tap water                                                  | 0.220588235 | kg   | market for<br>tap water  <br>tap water  <br>Cutoff, U -<br>BR                                                                            | (1,4,3,1,1,5) |
| Transport,<br>freight, lorry<br>16-32 metric<br>ton, EURO4<br>{RER} <br>transport,<br>freight, lorry<br>16-32 metric<br>ton, EURO4  <br>Cut-off, S -<br>Copied from | Transport,<br>freight, lorry<br>16-32 metric<br>ton, EURO4 | 0.066176471 | t*km | market for<br>transport,<br>freight, lorry<br>16-32 metric<br>ton, EURO4<br>  transport,<br>freight, lorry<br>16-32 metric<br>ton, EURO4 | (1,4,3,1,1,5) |

|                                                                                                        |                     |             |    |                                                                                             |                                                                                                                          |
|--------------------------------------------------------------------------------------------------------|---------------------|-------------|----|---------------------------------------------------------------------------------------------|--------------------------------------------------------------------------------------------------------------------------|
| Ecoinvent - RER                                                                                        |                     |             |    | Cutoff, U - RoW                                                                             |                                                                                                                          |
| Wastewater, average {CH}  treatment of, capacity 1.1E10/year   Cut-off, S - Copied from Ecoinvent - CH | Wastewater, average | 0.000193676 | m3 | treatment of wastewater, average, capacity 1E9/year   wastewater, average   Cutoff, U - RoW | Water released to treatment: 87.8% considered by default for food transformation, as per WFLDB Methodological Guidelines |

#### Outputs

| Flow Agribalyse                               | Flow Ecoinvent | Amount      | Unit | Provider | Description                                                                                                                                                                                                                                                                                                                                                                                      |
|-----------------------------------------------|----------------|-------------|------|----------|--------------------------------------------------------------------------------------------------------------------------------------------------------------------------------------------------------------------------------------------------------------------------------------------------------------------------------------------------------------------------------------------------|
| Durum wheat, bran, at plant (WFLDB 3.1)/GLO U |                | 0.308823529 | kg   |          | Data based on Bevilacqua 2007. Durum wheat semolina production in a mill producing 67'000 tonnes semolina/year. 9 tonnes durum wheat gives 6.8 tonnes semolina and 2.1 tonnes co-products (mainly bran) Included steps are: stocking (in silos), cleaning (wheat separated from extraneous materials), conditioning (water addition), grinding, sifting (classification: gives 76% semolina, 24% |

|                                                          |  |             |    |  |                                                                                                                                                                                                                                                                                                                                                                                                                                                                                                                                                                                  |
|----------------------------------------------------------|--|-------------|----|--|----------------------------------------------------------------------------------------------------------------------------------------------------------------------------------------------------------------------------------------------------------------------------------------------------------------------------------------------------------------------------------------------------------------------------------------------------------------------------------------------------------------------------------------------------------------------------------|
|                                                          |  |             |    |  | subproducts). Subproducts are used for cattle feed. Price of wheat bran based on alibaba.com, accessed May 2015, 10 first price data considered: 164 EUR/tonne                                                                                                                                                                                                                                                                                                                                                                                                                   |
| <i>Durum wheat, semolina, at plant (WFLDB 3.1)/GLO U</i> |  | 1           | kg |  | <i>Data based on Bevilacqua 2007. Durum wheat semolina production in a mill producing 68'000 tonnes semolina/year. 9 tonnes durum wheat gives 6.8 tonnes semolina and 2.1 tonnes co-products (mainly bran) Included steps are: stocking (in silos), cleaning (wheat separated from extraneous materials), conditioning (water addition), grinding, sifting (classification: gives 76% semolina, 24% subproducts). Subproducts are used for cattle feed. Price of durum wheat semolina based on alibaba.com, accessed May 2015, 10 first price data considered: 393 EUR/tonne</i> |
| Water                                                    |  | 0.026911765 | kg |  | Water evaporated: 12.2% considered by default for food transformation, as per WFLDB Methodological Guidelines                                                                                                                                                                                                                                                                                                                                                                                                                                                                    |
| Water, GLO                                               |  | 0.000193676 | m3 |  | Water released after treatment: 87.8% considered by default for food transformation, as per WFLDB Methodological Guidelines Note: ecoinvent 2.2                                                                                                                                                                                                                                                                                                                                                                                                                                  |

|  |  |  |  |  |                                                      |
|--|--|--|--|--|------------------------------------------------------|
|  |  |  |  |  | processes for WWT do not include the water effluent. |
|--|--|--|--|--|------------------------------------------------------|

### **Pasta, dried, from durum wheat, at plant**

*Description:* Included processes: This process covers the production of dried pasta from durum wheat. The inventory includes the inputs of durum wheat semolina, energy, water and land occupied by the factory. Transport of durum wheat semolina to the factory is included. Wastes (losses) composting is considered (empty ""dummy"" dataset for composting because of the cut-off allocation method). Packaging is not included.

Remark: The functional unit is the production of 1 kg of durum wheat pasta, unpacked. The production system is based on an Italian factory producing 365'000 tonnes pasta/year.

PEF-Quality: data quality rating (DQR) = 2.2 (i.e. good quality)

Boundary with nature: Unspecified

Record: Data entry by: Cécile Guignard

Telephone: 0041 21 693 91 92; E-mail: cecile.guignard@quantis-intl.com; Company: Quantis; Country: CH

Generator: Generator/publicator: Quantis, WFLDB team

Telephone: 0041 21 693 91 92; E-mail: xavier.bengoa@quantis-intl.com; Company: Quantis; Country: CH

*Transport data:* process “Dried pasta, cooked, unsalted, processed in FR | Chilled | PP | at distribution”.

# Inputs

| Flow Agribalyse                                                                                                                                                      | Flow Ecoinvent                                  | Amount  | Unit | Provider                                                                                                                                   | Description                                                                                                                               |
|----------------------------------------------------------------------------------------------------------------------------------------------------------------------|-------------------------------------------------|---------|------|--------------------------------------------------------------------------------------------------------------------------------------------|-------------------------------------------------------------------------------------------------------------------------------------------|
| Biowaste {CH} <br>treatment of<br>biowaste,<br>industrial<br>composting - CH                                                                                         | biowaste                                        | 0.01    | kg   | treatment of<br>biowaste,<br>industrial<br>composting  <br>biowaste   Cutoff,<br>U - RoW                                                   | (1,4,3,1,1,5)                                                                                                                             |
| Building, hall<br>{CH} <br>construction  <br>Cut-off, S - Copied<br>from Ecoinvent -<br>CH                                                                           | Building, hall                                  | 0.00003 | m2   | building<br>construction, hall<br>  building, hall  <br>Cutoff, U - RoW                                                                    | (5,4,3,1,4,na)<br>Infrastructure:<br>size of the<br>building assumed<br>to correspond to<br>the industrial<br>area, lifetime: 50<br>years |
| Durum wheat,<br>semolina, at plant<br>(WFLDB 3.1)/GLO<br>U                                                                                                           | Durum wheat,<br>semolina<br>(created)           | 1.01    | kg   | Durum wheat,<br>semolina, at plant<br>(WFLDB 3.1) - BR<br>(created)                                                                        | (1,4,3,1,1,5)                                                                                                                             |
| Electricity, low<br>voltage {RER} <br>market group for<br>  Cut-off, S -<br>Copied from<br>Ecoinvent - RER                                                           | Electricity, low<br>voltage                     | 0.16    | kWh  | market group for<br>electricity, low<br>voltage  <br>electricity, low<br>voltage   Cutoff, U<br>- BR                                       | (1,4,3,1,1,5) 40<br>kWh for services<br>and 120 for<br>processing                                                                         |
| Heat, central or<br>small-scale,<br>natural gas<br>{Europe without<br>Switzerland} <br>heat production,<br>natural gas, at<br>boiler modulating<br><100kW   Cut-off, | Heat, central or<br>small-scale,<br>natural gas | 1.148   | MJ   | heat production,<br>natural gas, at<br>boiler modulating<br><100kW   heat,<br>central or small-<br>scale, natural gas<br>  Cutoff, U - RoW | (1,4,3,1,1,5) 136<br>MJ heat gas for<br>services and 1012<br>for drying                                                                   |

|                                                                                                                                                                       |                                                                                                     |        |       |                                                                                                                                           |                                                                |
|-----------------------------------------------------------------------------------------------------------------------------------------------------------------------|-----------------------------------------------------------------------------------------------------|--------|-------|-------------------------------------------------------------------------------------------------------------------------------------------|----------------------------------------------------------------|
| S - Copied from Ecoinvent                                                                                                                                             |                                                                                                     |        |       |                                                                                                                                           |                                                                |
| Heat, central or small-scale, other than natural gas {CH}  heat production, light fuel oil, at boiler 100kW, non-modulating   Cut-off, S - Copied from Ecoinvent - CH | Heat, central or small-scale, other than natural gas                                                | 0.7    | MJ    | heat production, light fuel oil, at boiler 100kW, non-modulating   heat, central or small-scale, other than natural gas   Cutoff, U - RoW | (1,4,3,1,1,5)<br>Drying                                        |
| Occupation, industrial area, built up                                                                                                                                 | Occupation, industrial area, built up                                                               | 0.0015 | m2*a  |                                                                                                                                           | (1,4,3,1,1,5)                                                  |
| Occupation, traffic area                                                                                                                                              | Occupation, traffic area                                                                            | 0.0002 | m2*a  |                                                                                                                                           | (1,4,3,1,1,5)                                                  |
| Tap water {RER}  market group for   Cut-off, U - Copied from Ecoinvent - RER                                                                                          | Tap water                                                                                           | 0.31   | kg    | market for tap water   tap water   Cutoff, U - BR                                                                                         | (1,4,3,1,1,5)                                                  |
| Transport, freight, lorry with refrigeration machine, 7.5-16 ton, EURO5, R134a refrigerant, cooling {GLO}  transport, freight, lorry with                             | Transport, freight, lorry with refrigeration machine, 7.5-16 ton, EURO5, R134a refrigerant, cooling | 472.5  | kg*km | market for transport, freight, lorry with refrigeration machine, 7.5-16 ton, EURO5, R134a refrigerant, cooling   transport, freight,      | Transport to distribution, includes mass of packaging material |

|                                                                                                                                                       |                                                   |            |      |                                                                                                                                    |                                                                                                                          |
|-------------------------------------------------------------------------------------------------------------------------------------------------------|---------------------------------------------------|------------|------|------------------------------------------------------------------------------------------------------------------------------------|--------------------------------------------------------------------------------------------------------------------------|
| refrigeration machine, 7.5-16 ton, EURO5, R134a refrigerant, cooling   Cut-off, S - Copied from Ecoinvent - GLO                                       |                                                   |            |      | lorry with refrigeration machine, 7.5-16 ton, EURO5, R134a refrigerant, cooling   Cutoff, U - GLO                                  |                                                                                                                          |
| Transport, freight, lorry 16-32 metric ton, EURO4 {RER}  transport, freight, lorry 16-32 metric ton, EURO4   Cut-off, S - Copied from Ecoinvent - RER | Transport, freight, lorry 16-32 metric ton, EURO4 | 0.101      | t*km | market for transport, freight, lorry 16-32 metric ton, EURO4   transport, freight, lorry 16-32 metric ton, EURO4   Cutoff, U - RoW | (1,4,3,1,1,5)                                                                                                            |
| Wastewater, average {CH}  treatment of, capacity 1.1E10l/year   Cut-off, S - Copied from Ecoinvent - CH                                               | Wastewater, average                               | 0.00027218 | m3   | treatment of wastewater, average, capacity 1E9l/year   wastewater, average   Cutoff, U - RoW                                       | Water released to treatment: 87.8% considered by default for food transformation, as per WFLDB Methodological Guidelines |

#### Outputs

| Flow Agribalyse | Flow Ecoinvent | Amount | Unit | Provider | Description |
|-----------------|----------------|--------|------|----------|-------------|
|-----------------|----------------|--------|------|----------|-------------|

|                                                            |  |            |    |  |                                                                                                                                                                                                                                                                                         |
|------------------------------------------------------------|--|------------|----|--|-----------------------------------------------------------------------------------------------------------------------------------------------------------------------------------------------------------------------------------------------------------------------------------------|
| Pasta, dried, from durum wheat, at plant (WFLDB 3.1)/GLO U |  | 1          | kg |  | Process based on Bevilacqua 2007. Durum wheat pasta produced in integrated process plant producing 1000 tonnes pasta/day. Included steps: semolina stocking (in silos), dosing (water addition), kneading (in vacuum condition), bronze drawing, drying, packing, stocking (warehouse). |
| Water                                                      |  | 0.03782    | kg |  | Water evaporated: 12.2% considered by default for food transformation, as per WFLDB Methodological Guidelines                                                                                                                                                                           |
| Water, GLO                                                 |  | 0.00027218 | m3 |  | Water released after treatment: 87.8% considered by default for food transformation, as per WFLDB Methodological Guidelines Note:                                                                                                                                                       |



|  |  |  |  |  |                                                                    |
|--|--|--|--|--|--------------------------------------------------------------------|
|  |  |  |  |  | ecoinvent 2.2 processes for WWT do not include the water effluent. |
|--|--|--|--|--|--------------------------------------------------------------------|

### Gas boiling, industrial, 1kg of boiled product, for boiling

*Description:* Boundary with nature: Unspecified

#### Inputs

| Flow Agribalyse                                                                         | Flow Ecoinvent                            | Amount | Unit | Provider                                                                                                                | Description                                                                      |
|-----------------------------------------------------------------------------------------|-------------------------------------------|--------|------|-------------------------------------------------------------------------------------------------------------------------|----------------------------------------------------------------------------------|
| Heating, industrial, 1kg of gas heated product, for gas boiling/ FR U                   | Heat, central or small-scale, natural gas | 3.77   | MJ   | heat production, natural gas, at boiler modulating <100kW   heat, central or small-scale, natural gas   Cutoff, U - RoW | FSTC (1999), CEN (2005), Marti et al (2013), manufacturer's specification (2014) |
| Tap water {Europe without Switzerland}  market for   Cutoff, S - Copied from Ecoinvent  | tap water                                 | 4.44   | kg   | market for tap water   tap water   Cutoff, U - BR                                                                       | Manufacturer's specification                                                     |
| Wastewater, average {Europe without Switzerland}  market for wastewater, average   Cut- | Wastewater, average                       | 2.01   | l    | market for wastewater, average   wastewater, average   Cutoff, U - RoW                                                  | Marti et al                                                                      |

|                                   |  |  |  |  |  |
|-----------------------------------|--|--|--|--|--|
| off, S - Copied<br>from Ecoinvent |  |  |  |  |  |
|-----------------------------------|--|--|--|--|--|

#### Outputs

| Flow Agribalyse                                                            | Flow Ecoinvent | Amount | Unit | Provider | Description                                                                                                                                                  |
|----------------------------------------------------------------------------|----------------|--------|------|----------|--------------------------------------------------------------------------------------------------------------------------------------------------------------|
| BOD5, Biological<br>Oxygen Demand                                          |                | 0.6    | g    |          | Regolamento per la<br>semplificazione di<br>adempimenti<br>amministrativi in<br>materia ambientale<br>gravanti sulle<br>imprese, 2011                        |
| Gas boiling,<br>industrial, 1kg of<br>boiled product,<br>for boiling/ FR U |                | 1      | kg   |          | Data from<br>Evaluation of<br>environmental<br>impacts in the<br>catering sector, the<br>case of pasta, Fusia,<br>Guidetta, Azapagicb<br>et al, 2014 - Italy |
| Water                                                                      |                | 0.18   | kg   |          | Article calculations                                                                                                                                         |

## G. Food items without available LCA inventories

| Food group                | Food items (in Portuguese) <sup>4</sup>                                                                                                                                                                                                                                                                                                                                                                                                                                                                                                                                                                                                                                                                                                                                                                                                                                                                                                                                                                                                                                                                                                                                                                                                                                                                                                                                                                                                                                                                                                                                                                                                                                                                 |
|---------------------------|---------------------------------------------------------------------------------------------------------------------------------------------------------------------------------------------------------------------------------------------------------------------------------------------------------------------------------------------------------------------------------------------------------------------------------------------------------------------------------------------------------------------------------------------------------------------------------------------------------------------------------------------------------------------------------------------------------------------------------------------------------------------------------------------------------------------------------------------------------------------------------------------------------------------------------------------------------------------------------------------------------------------------------------------------------------------------------------------------------------------------------------------------------------------------------------------------------------------------------------------------------------------------------------------------------------------------------------------------------------------------------------------------------------------------------------------------------------------------------------------------------------------------------------------------------------------------------------------------------------------------------------------------------------------------------------------------------|
| Vegetables                | <i>Cogumelo em conserva (25.5g, 0.001%); Cogumelo in natura (15g, 0.001%).</i>                                                                                                                                                                                                                                                                                                                                                                                                                                                                                                                                                                                                                                                                                                                                                                                                                                                                                                                                                                                                                                                                                                                                                                                                                                                                                                                                                                                                                                                                                                                                                                                                                          |
| Bread and bakery products | <i>Pão doce (1275g, 0.031%); Rosca doce (1200g, 0.031%); Panetone (540g, 0.015%); Pão de leite (350g, 0.009%); Pão doce com recheio (250.8g, 0.006%); Pão de mel (138.65g, 0.003%); Pão doce sem recheio (50g, 0.001%); Bolo de chocolate (3275g, 0.064%); Bolo de milho (3060g, 0.082%); Bolo de trigo (2340g, 0.043%); Bolo simples (1980g, 0.041%); Bolo de cenoura (1200g, 0.023%); Bolo de laranja (1140g, 0.033%); Bolo de mandioca (1040g, 0.023%); Bolo doce com recheio e cobertura (480g, 0.011%); Bolo de banana (490g, 0.011%); Bolo de fubá (480g, 0.011%); Bolo de tapioca (560g, 0.013%); Bolo de coco (360g, 0.01%); Bolo de aipim (320g, 0.006%); Bolo de limão (300g, 0.013%); Filhos (bolinho de farinha de trigo e ovos) (340g, 0.007%); Bolo de chocolate com recheio e cobertura (120g, 0.003%); Bolo de cara (80g, 0.002%); Bolo de arroz (60g, 0.002%); Bolo de cenoura sem recheio com cobertura (540g, 0.026%); Tortas doces de qualquer sabor (552.5g, 0.015%); Biscoito doce (5888g, 0.131%); Bolacha doce (675g, 0.016%); Rosquinha doce (645g, 0.018%); Broa (170g, 0.008%); Biscoito salgado (6444g, 0.148%); Bolacha salgada (2112.5g, 0.041%); Biscoito de polvilho (636g, 0.016%); Biscoito não especificado (215g, 0.006%); Biscoito salgado integral (25g, 0.005%); Biscoito recheado (1906g, 0.051%); Bolacha recheada (265g, 0.007%); Salgadinho de milho (tipo doritos, fandangos, cheetos) (764g, 0.022%); Salgadinho batata chips (tipo ruffles) (192g, 0.005%); Chips (salgadinhos) (25g, 0.001%); Biscoito waffer / wafer light (320g, 0.006%); Bolo diet simples (60g, 0.012%); Bolacha salgada light (100g, 0.003%); Pão integral light (23g, 0.001%).</i> |
| Sweets                    | <i>Barra de chocolate (1026.3g, 0.023%); Brigadeiro (530g, 0.012%); Chocolate (437.6g, 0.015%); Bombom de qualquer marca (220g, 0.006%); Ovo de pascoa (177.6g, 0.003%); Tablete de chocolate (126g, 0.004%); Chocolate, tablete não especificado (69.3g, 0.002%); Confete (45g, 0.001%); Chocolate, tablete, ao leite (25.2g, 0.001%); Chocolate, tablete, branco (12.6g, 0%);</i>                                                                                                                                                                                                                                                                                                                                                                                                                                                                                                                                                                                                                                                                                                                                                                                                                                                                                                                                                                                                                                                                                                                                                                                                                                                                                                                     |

<sup>4</sup> In parentheses we present the sample's total consumption (g) and the percentual of total food consumed in Brasília, respectively. These food items account for 3.601% of total food consumed in Brasília.

|               |                                                                                                                                                                                                                                                                                                                                                                                                                                                                                                                                                                                                                                                                                                                                                                                                                                                                                                                                                                                                                                                                                                                                                                                                                                                                                                                                                                                                                                                                                                                                                                                                                                                                                                                                                                                                                                                                                                                                                                                               |
|---------------|-----------------------------------------------------------------------------------------------------------------------------------------------------------------------------------------------------------------------------------------------------------------------------------------------------------------------------------------------------------------------------------------------------------------------------------------------------------------------------------------------------------------------------------------------------------------------------------------------------------------------------------------------------------------------------------------------------------------------------------------------------------------------------------------------------------------------------------------------------------------------------------------------------------------------------------------------------------------------------------------------------------------------------------------------------------------------------------------------------------------------------------------------------------------------------------------------------------------------------------------------------------------------------------------------------------------------------------------------------------------------------------------------------------------------------------------------------------------------------------------------------------------------------------------------------------------------------------------------------------------------------------------------------------------------------------------------------------------------------------------------------------------------------------------------------------------------------------------------------------------------------------------------------------------------------------------------------------------------------------------------|
|               | <p><i>Chocolate, tablete, meio amargo (12.6g, 0%); Chocolate, tablete, ao leite, recheado (6.3g, 0%); Achocolatado em po (822g, 0.019%); Canjica (950g, 0.033%); Pudim de leite (520g, 0.011%); Cuscuz com leite (2041.5g, 0.035%); Mousse (1010g, 0.026%); Doce de leite (1030.5g, 0.023%); Milk shake (600g, 0.025%); Pudim de qualquer sabor (260g, 0.004%); Curau de milho (460g, 0.013%); Chande de qualquer sabor (220g, 0.004%); Arroz-doce (280g, 0.005%); Leite condensado (122g, 0.003%); Pasta de amendoim (150g, 0.003%); Doce de amendoim (170g, 0.003%); Pacoca (62g, 0.001%); Pacoquinha de amendoim (30g, 0.001%); Goiabada (500g, 0.012%); Doce de frutas em pasta de qualquer sabor (360g, 0.028%); Banana flambada (120g, 0.002%); Doce de frutas em calda de qualquer sabor (105g, 0.002%); Geleia de frutas de qualquer marca ou sabor (102.5g, 0.001%); Sorvete de qualquer sabor industrializado (3378g, 0.114%); Din din (660g, 0.015%); Sorvete de casquinha / cone (404g, 0.01%); Picole de qualquer sabor industrializado (260g, 0.006%); Sorvete à base de iogurte (84g, 0.003%); Sorvete sundae (84g, 0.002%); Mel (58g, 0.001%); Adocante artificial (181g, 0.005%); Gelatina de qualquer sabor (1432.5g, 0.03%); Bala (765g, 0.025%); Tapioca doce recheada (630g, 0.011%); Gemada (400g, 0.01%); Pizza doce de qualquer sabor (300g, 0.007%); Jujuba (400g, 0.011%); Pave de qualquer sabor (85g, 0.001%); Doce de abobora (332g, 0.006%); Barra de cereais (275g, 0.005%); Pirulito (175g, 0.004%); Crepe / panqueca de fruta com Açúcar e canela (160g, 0.003%); Cocada (140g, 0.001%); Geleia de mocoto (136g, 0.002%); Bala de goma (5g, 0%); Marshmallow (80g, 0.001%); Crepe / panqueca de geleia (80g, 0.005%); Churro (59g, 0.012%); Barra de cereais doce (25g, 0%); Pastel com recheio doce (25g, 0.001%); Bala de fruta (20g, 0%); Chicletes (15g, 0%); Doce de frutas em barra ou pasta light (60g, 0.012%); Geleia diet (37.5g, 0.001%).</i></p> |
| Fats and oils | <p><i>Margarina com ou sem sal (7808.5g, 0.193%); Maionese (molho) (1011.6g, 0.025%); Margarina light (5g, 0%).</i></p>                                                                                                                                                                                                                                                                                                                                                                                                                                                                                                                                                                                                                                                                                                                                                                                                                                                                                                                                                                                                                                                                                                                                                                                                                                                                                                                                                                                                                                                                                                                                                                                                                                                                                                                                                                                                                                                                       |
| Beverages     | <p><i>Bebida alcoolica (1200g, 0.021%); Cachaca (300g, 0.005%); Caipirinha (500g, 0.011%); Batida de qualquer sabor (300g, 0.011%); Vinho (2070g, 0.069%); Caldo de cana (2200g, 0.083%); Energetico (946g, 0.015%); Bebida energetica (500g, 0.01%); Bebida isotonica (240g, 0.007%).</i></p>                                                                                                                                                                                                                                                                                                                                                                                                                                                                                                                                                                                                                                                                                                                                                                                                                                                                                                                                                                                                                                                                                                                                                                                                                                                                                                                                                                                                                                                                                                                                                                                                                                                                                                |

|                    |                                                                                                                                                                                                                                                                                                                                                                                                                                                                                                                                                                                                                                                                                                                                                                                                                                                                                                                                                                                                                                                                                                                                                                                                                                                                                                                                                                                                                                                                                                                                                                                                                                                                                                                                                                                                                                                                                            |
|--------------------|--------------------------------------------------------------------------------------------------------------------------------------------------------------------------------------------------------------------------------------------------------------------------------------------------------------------------------------------------------------------------------------------------------------------------------------------------------------------------------------------------------------------------------------------------------------------------------------------------------------------------------------------------------------------------------------------------------------------------------------------------------------------------------------------------------------------------------------------------------------------------------------------------------------------------------------------------------------------------------------------------------------------------------------------------------------------------------------------------------------------------------------------------------------------------------------------------------------------------------------------------------------------------------------------------------------------------------------------------------------------------------------------------------------------------------------------------------------------------------------------------------------------------------------------------------------------------------------------------------------------------------------------------------------------------------------------------------------------------------------------------------------------------------------------------------------------------------------------------------------------------------------------|
| Snack foods        | <p>Pão de queijo (11540g, 0.317%); Tapioca salgada recheada (2048.5g, 0.07%); Salgadinho (1435g, 0.036%); Tapioca recheada com queijo (1546.9g, 0.053%); Tapioca recheio não-especificado (1440g, 0.023%); Pastel (queijo, carne, palmito, etc) (1136g, 0.032%); Enroladinho (351g, 0.01%); Tranca salgada recheada (360g, 0.009%); Tapioca recheada com carne e queijo (241g, 0.016%); Rosca recheada (240g, 0.005%); Rissolle / rizole (queijo, carne, camarao, etc) (95g, 0.003%); Empada (queijo, carne, camarao, etc) (110g, 0.004%); Pastel de forno/ pastel assado (queijo, carne, palmito, etc) (125g, 0.004%); Mini pastel (96g, 0.002%); Croissant com recheio salgado (80g, 0.002%); Esfirra (80g, 0.001%); Bolinho de aipim (45g, 0.001%); Cachorro quente (4125g, 0.107%); Misto quente ou frio (3973.7g, 0.116%); Pão com queijo (3950g, 0.101%); Hamburguer (sanduiche) (3250g, 0.083%); Pão com mortadela (3050g, 0.075%); Pão com ovo (3012.5g, 0.078%); Pão com queijo e presunto (1965.625g, 0.056%); Wrap de carne (1540g, 0.033%); Sanduiche natural (1320g, 0.044%); Sanduiche de carne assada (140g, 0.005%); Sanduiche de queijo prato com presunto (450g, 0.011%); Sanduiche de queijo (480g, 0.016%); Pão com presunto (360g, 0.009%); Pão com carne assada (420g, 0.012%); Pão com salame (220g, 0.004%); Sanduiche de atum (300g, 0.01%); Sanduiche de file (140g, 0.007%); Pão com peito de peru (252g, 0.006%); X-bacon (220g, 0.012%); Sanduiche bauru (185g, 0.005%); Wrap frango ou galinha (181.5g, 0.005%); Sanduiche de presunto (180g, 0.004%); Sanduiche de mortadela (180g, 0.004%); Pão com rosbife (140g, 0.007%); Americano (135g, 0.003%); Cachorro quente completo (125g, 0%); Sanduiche de queijo minas (120g, 0.004%); Sanduiche de queijo prato (90g, 0.003%); Sanduiche de peito de peru (84g, 0.005%); Queijo quente (25g, 0.001%); .</p> |
| Supplements        | <p>Complemento alimentar de qualquer sabor (648g, 0.012%); Suplemento proteico e outros (360g, 0.011%); Concentrado alimentar diet shake (116.8g, 0.005%); Diet shake (43.8g, 0.003%); Sustagem (30g, 0%); Vitaminas, minerais e outros (30g, 0.001%).</p>                                                                                                                                                                                                                                                                                                                                                                                                                                                                                                                                                                                                                                                                                                                                                                                                                                                                                                                                                                                                                                                                                                                                                                                                                                                                                                                                                                                                                                                                                                                                                                                                                                 |
| Sauces and spices  | <p>Ketchup (1022.05g, 0.026%); Molho de tomate (180g, 0.004%); Mostarda molho (204.95g, 0.006%); Shoyo (94.4g, 0.003%); Canela (22g, 0%); Sal (1g, 0%).</p>                                                                                                                                                                                                                                                                                                                                                                                                                                                                                                                                                                                                                                                                                                                                                                                                                                                                                                                                                                                                                                                                                                                                                                                                                                                                                                                                                                                                                                                                                                                                                                                                                                                                                                                                |
| Mixed preparations | <p>Mexido (135g, 0.002%).</p>                                                                                                                                                                                                                                                                                                                                                                                                                                                                                                                                                                                                                                                                                                                                                                                                                                                                                                                                                                                                                                                                                                                                                                                                                                                                                                                                                                                                                                                                                                                                                                                                                                                                                                                                                                                                                                                              |
